# Supplementary material
Source: HighWire-hosted journal article supplement (http://www.jrheum.org/highwire/filestream/36869/field_highwire_adjunct_files/0/190186DataSuppl.pdf)

**Study ID:**

**Reader Last Name:**

(Supplement 1)

**Only record lesions with bone edema in Inflammation section**

**Maximal signal strength** is determined based on comparison to fluid intensity (i.e. bladder, CSF, vasculature).

**Relative size** will be reported as the proportion of the **maximum areal size** of each lesion in relation to the assessed area (i.e. epiphysis, metaphysis), 1-25% mild, 25- 50% moderate, >50% severe.

**Soft tissue/periosteal inflammation, bony expansions** are reported as present/absent.

**Damage is reported separately**

**Hand** is considered as one unit, **foot** is divided to hindfoot (talus/calcaneus), mid/forefoot (tarsals, metatarsals, phalanges)

§Complex bones/truncal long bones will be assessed as **one unit except:**

\***Sacrum** will be divided into left and right halves

#**Pelvis** will be divided into ilium, peri-acetabulum, pubis/ischium

&**Mandible** will be divided into left and right halves

**Manubrium and sternum** are combined

**\*\*\*\*\*General Section\*\*\*\*\***

1. Are there lesions with hyperintensity in bone marrow consistent with CNO? \_\_\_\_\_  
If yes, please use corresponding templates. ***If unsure, please mark your confidence level (low or medium).*** No need to mark if confidence is high.  
Long bones templates: humerus, ulna, radius, femur, tibia, fibula  
Complex bone templates: Scapula, Sacrum (combine S1-5 for each side), pelvis (ilium, peri-acetabulum, pubis/ischium), ribs, manubrium/sternum, mandible, skull, patella, clavicle  
Spine templates: C, T, L spine  
Hand/feet templates
2. Are there CNO-related bony damages? \_\_\_\_\_ If yes, please complete "damage scoring".
3. Are there joint effusion concerning for synovitis? If yes, please list all \_\_\_\_\_
4. Are there non-CNO bony abnormalities? If yes, please list all \_\_\_\_\_
5. Are there any limb hypertrophy? If yes, please list all \_\_\_\_\_

**\*\*\*\*\*Damage scoring\*\*\*\*\***

Kyphosis: Yes, No, NA

Pathological fracture: \_\_\_\_\_ Sites: \_\_\_\_\_

Bone units as a single bone:

Vertebrae (C, T, L)

Clavicle

Scapula

Rib

Long bones

Patella

Bone units divided by laterality:

Skull

Mandible

Sacrum

Pelvis divided into:

Ilium

Periacetabulum

Pubis/ischium

Bone units combined:

Manubrium + sternum

Hand (carpals, metacarpals, phalanges)

Hindfoot (talus, calcaneus)

Fore/mid foot (tarsals, metatarsals, phalanges)

Long bones divided into:

Proximal epiphysis

Proximal metaphysis

Diaphysis

Distal metaphysis

Distal epiphysis

**Study ID:**

**Reader Last Name:**

**Long bones (extremities) Template:**

Lesion site:  Right, Left  
**Bone marrow hyperintensity:** absent, <fluid signal, similar to fluid signal  
**Signal size within proximal epiphysis:** absent, <25%, 25-50%, >50%  
**Signal size within proximal metaphysis:** absent, <25%, 25-50%, >50%,  
**Signal size within diaphysis:** absent, <25%, 25-50%, >50%; contiguous?  
**Signal size within distal metaphysis:** absent, <25%, 25-50%, >50%  
**Signal size within distal epiphysis:** absent, <25%, 25-50%, >50%  
**Soft tissue/periosteal hyperintensity:** absent, present  
**Bony expansion:** absent, present  
 Only mark if confidence is *low* or *medium*, sites: \_\_\_\_\_

**Long bones (extremities) Template:**

Lesion site:  Right, Left  
**Bone marrow hyperintensity:** absent, <fluid signal, similar to fluid signal  
**Signal size within proximal epiphysis:** absent, <25%, 25-50%, >50%  
**Signal size within proximal metaphysis:** absent, <25%, 25-50%, >50%,  
**Signal size within diaphysis:** absent, <25%, 25-50%, >50%; contiguous?  
**Signal size within distal metaphysis:** absent, <25%, 25-50%, >50%  
**Signal size within distal epiphysis:** absent, <25%, 25-50%, >50%  
**Soft tissue/periosteal hyperintensity:** absent, present  
**Bony expansion:** absent, present  
 Only mark if confidence is *low* or *medium*, sites: \_\_\_\_\_

**Complex bone (scapula<sup>§</sup>, pelvis<sup>#</sup>, sacrum<sup>\*</sup>, mandible<sup>&</sup>, skull<sup>§</sup>) or truncal long bones (clavicle<sup>§</sup>, rib<sup>§</sup>, manubrium/sterna<sup>§</sup>) and patella<sup>§</sup> template:**

Lesion site:  Right, Left  
**Bone marrow hyperintensity:** absent, <fluid signal, similar to fluid signal  
**Signal size:** absent, <25%, 25-50%, >50%, present (not gradable due to artifact), **extends to adjacent contiguous bone?** If so, please write the name of site \_\_\_\_\_ and the size \_\_\_\_\_  
**Soft tissue/periosteal hyperintensity:** absent, present  
**Bony expansion:** absent, present  
 Only mark if confidence is *low* or *medium*, sites: \_\_\_\_\_

**Hand/feet template:**

Lesion site:  Right, Left  
**Bone marrow hyperintensity:** absent, <fluid signal, similar to fluid signal  
**Signal size:** absent, <25%, 25-50%, >50%, present (not gradable due to artifact),  
**# of bones with edema:** \_\_\_\_\_, **specific bones:** \_\_\_\_\_  
**Soft tissue/periosteal hyperintensity:** absent, present  
**Bony expansion:** absent, present  
 Only mark if confidence is *low* or *medium*, sites: \_\_\_\_\_

**Cervical/thoracic/lumbar spine (Vertebral body) template:**

Lesion site:  (i.e. C2, T5, L3)  
**Bone marrow hyperintensity:** absent, <fluid signal, similar to fluid signal  
**Signal size:** absent, <25%, 25-50%, >50%, present (not gradable due to artifact), **involving posterior and/or lateral elements?**  
**Soft tissue/periosteal hyperintensity:** absent, present  
**Bony expansion:** absent, present  
**Compression:** absent, height loss, plana  
 Only mark if confidence is *low* or *medium*, sites: \_\_\_\_\_

**Long bones (extremities) Template:**

Lesion site:  Right, Left  
**Bone marrow hyperintensity:** absent, <fluid signal, similar to fluid signal  
**Signal size within proximal epiphysis:** absent, <25%, 25-50%, >50%  
**Signal size within proximal metaphysis:** absent, <25%, 25-50%, >50%,  
**Signal size within diaphysis:** absent, <25%, 25-50%, >50%; contiguous?  
**Signal size within distal metaphysis:** absent, <25%, 25-50%, >50%  
**Signal size within distal epiphysis:** absent, <25%, 25-50%, >50%  
**Soft tissue/periosteal hyperintensity:** absent, present  
**Bony expansion:** absent, present  
 Only mark if confidence is *low* or *medium*, sites: \_\_\_\_\_

**Long bones (extremities) Template:**

Lesion site:  Right, Left  
**Bone marrow hyperintensity:** absent, <fluid signal, similar to fluid signal  
**Signal size within proximal epiphysis:** absent, <25%, 25-50%, >50%  
**Signal size within proximal metaphysis:** absent, <25%, 25-50%, >50%,  
**Signal size within diaphysis:** absent, <25%, 25-50%, >50%; contiguous?  
**Signal size within distal metaphysis:** absent, <25%, 25-50%, >50%  
**Signal size within distal epiphysis:** absent, <25%, 25-50%, >50%  
**Soft tissue/periosteal hyperintensity:** absent, present  
**Bony expansion:** absent, present  
 Only mark if confidence is *low* or *medium*, sites: \_\_\_\_\_

**Complex bone (scapula<sup>§</sup>, pelvis<sup>#</sup>, sacrum<sup>\*</sup>, mandible<sup>&</sup>, skull<sup>§</sup>) or truncal long bones (clavicle<sup>§</sup>, rib<sup>§</sup>, manubrium/sterna<sup>§</sup>) and patella<sup>§</sup> template:**

Lesion site:  Right, Left  
**Bone marrow hyperintensity:** absent, <fluid signal, similar to fluid signal  
**Signal size:** absent, <25%, 25-50%, >50%, present (not gradable due to artifact), **extends to adjacent contiguous bone?** If so, please write the name of site \_\_\_\_\_ and the size \_\_\_\_\_  
**Soft tissue/periosteal hyperintensity:** absent, present  
**Bony expansion:** absent, present  
 Only mark if confidence is *low* or *medium*, sites: \_\_\_\_\_

**Hand/feet template:**

Lesion site:  Right, Left  
**Bone marrow hyperintensity:** absent, <fluid signal, similar to fluid signal  
**Signal size:** absent, <25%, 25-50%, >50%, present (not gradable due to artifact),  
**# of bones with edema:** \_\_\_\_\_, **specific bones:** \_\_\_\_\_  
**Soft tissue/periosteal hyperintensity:** absent, present  
**Bony expansion:** absent, present  
 Only mark if confidence is *low* or *medium*, sites: \_\_\_\_\_

**Cervical/thoracic/lumbar spine (Vertebral body) template:**

Lesion site:  (i.e. C2, T5, L3)  
**Bone marrow hyperintensity:** absent, <fluid signal, similar to fluid signal  
**Signal size:** absent, <25%, 25-50%, >50%, present (not gradable due to artifact), **involving posterior and/or lateral elements?**  
**Soft tissue/periosteal hyperintensity:** absent, present  
**Bony expansion:** absent, present  
**Compression:** absent, height loss, plana  
 Only mark if confidence is *low* or *medium*, sites: \_\_\_\_\_

**Study ID:**

**Reader Last Name:**

|                                                                                                                                                                                                                                                                                                                                                                                                                                                                                                                                                                                                                                                                                                                                                                                                                                                                                                                                                                                                                                                                                                                                                                                                                                                                                                                                                                                                                                                                                                                                                                                                                                                                                                                                                                                                                                                                                                                                                                                                                                                                                                                                                                                                                                                                                                                                                                                                                                                                                                                                                                                                                                                                                                                                                                                                                                                                                                                                                                                                                                                                                                                                                                                                                                                                                                                                                                                                                                                                                                                                                                                                                                                                                                                                                                                                                                                                                                                                                                                                                                                                                                                                                          |                                                                                                                                                                                                                                                                                                                                                                                                                                                                                                                                                                                                                                                                                                                                                                                                                                                                                                                                                                                                                                                                                                                                                                                                                                                                                                                                                                                                                                                                                                                                                                                                                                                                                                                                                                                                                                                                                                                                                                                                                                                                                                                                                                                                                                                                                                                                                                                                                                                                                                                                                                                                                                                                                                                                                                                                                                                                                                                                                                                                                                                                                                                                                                                                                                                                                                                                                                                                                                                                                                                                                                                                                                                                                                                                                                                                                                                                                                                                                                                                                                                                                                                                                          |
|----------------------------------------------------------------------------------------------------------------------------------------------------------------------------------------------------------------------------------------------------------------------------------------------------------------------------------------------------------------------------------------------------------------------------------------------------------------------------------------------------------------------------------------------------------------------------------------------------------------------------------------------------------------------------------------------------------------------------------------------------------------------------------------------------------------------------------------------------------------------------------------------------------------------------------------------------------------------------------------------------------------------------------------------------------------------------------------------------------------------------------------------------------------------------------------------------------------------------------------------------------------------------------------------------------------------------------------------------------------------------------------------------------------------------------------------------------------------------------------------------------------------------------------------------------------------------------------------------------------------------------------------------------------------------------------------------------------------------------------------------------------------------------------------------------------------------------------------------------------------------------------------------------------------------------------------------------------------------------------------------------------------------------------------------------------------------------------------------------------------------------------------------------------------------------------------------------------------------------------------------------------------------------------------------------------------------------------------------------------------------------------------------------------------------------------------------------------------------------------------------------------------------------------------------------------------------------------------------------------------------------------------------------------------------------------------------------------------------------------------------------------------------------------------------------------------------------------------------------------------------------------------------------------------------------------------------------------------------------------------------------------------------------------------------------------------------------------------------------------------------------------------------------------------------------------------------------------------------------------------------------------------------------------------------------------------------------------------------------------------------------------------------------------------------------------------------------------------------------------------------------------------------------------------------------------------------------------------------------------------------------------------------------------------------------------------------------------------------------------------------------------------------------------------------------------------------------------------------------------------------------------------------------------------------------------------------------------------------------------------------------------------------------------------------------------------------------------------------------------------------------------------------------|----------------------------------------------------------------------------------------------------------------------------------------------------------------------------------------------------------------------------------------------------------------------------------------------------------------------------------------------------------------------------------------------------------------------------------------------------------------------------------------------------------------------------------------------------------------------------------------------------------------------------------------------------------------------------------------------------------------------------------------------------------------------------------------------------------------------------------------------------------------------------------------------------------------------------------------------------------------------------------------------------------------------------------------------------------------------------------------------------------------------------------------------------------------------------------------------------------------------------------------------------------------------------------------------------------------------------------------------------------------------------------------------------------------------------------------------------------------------------------------------------------------------------------------------------------------------------------------------------------------------------------------------------------------------------------------------------------------------------------------------------------------------------------------------------------------------------------------------------------------------------------------------------------------------------------------------------------------------------------------------------------------------------------------------------------------------------------------------------------------------------------------------------------------------------------------------------------------------------------------------------------------------------------------------------------------------------------------------------------------------------------------------------------------------------------------------------------------------------------------------------------------------------------------------------------------------------------------------------------------------------------------------------------------------------------------------------------------------------------------------------------------------------------------------------------------------------------------------------------------------------------------------------------------------------------------------------------------------------------------------------------------------------------------------------------------------------------------------------------------------------------------------------------------------------------------------------------------------------------------------------------------------------------------------------------------------------------------------------------------------------------------------------------------------------------------------------------------------------------------------------------------------------------------------------------------------------------------------------------------------------------------------------------------------------------------------------------------------------------------------------------------------------------------------------------------------------------------------------------------------------------------------------------------------------------------------------------------------------------------------------------------------------------------------------------------------------------------------------------------------------------------------------------|
| <p><b><u>Long bones (extremities) Template:</u></b></p> <p>Lesion site: <input style="width: 50px;" type="text"/> Right, Left</p> <p><b><u>Bone marrow hyperintensity:</u></b> absent, &lt;fluid signal, similar to fluid signal</p> <p><b><u>Signal size within proximal epiphysis:</u></b> absent, &lt;25%, 25-50%, &gt;50%</p> <p><b><u>Signal size within proximal metaphysis:</u></b> absent, &lt;25%, 25-50%, &gt;50%,</p> <p><b><u>Signal size within diaphysis:</u></b> absent, &lt;25%, 25-50%, &gt;50%; contiguous?</p> <p><b><u>Signal size within distal metaphysis:</u></b> absent, &lt;25%, 25-50%, &gt;50%</p> <p><b><u>Signal size within distal epiphysis:</u></b> absent, &lt;25%, 25-50%, &gt;50%</p> <p><b><u>Soft tissue/periosteal hyperintensity:</u></b> absent, present</p> <p><b><u>Bony expansion:</u></b> absent, present</p> <p>Only mark if confidence is <i>low</i> or <i>medium</i>, sites: _____</p><br><p><b><u>Long bones (extremities) Template:</u></b></p> <p>Lesion site: <input style="width: 50px;" type="text"/> Right, Left</p> <p><b><u>Bone marrow hyperintensity:</u></b> absent, &lt;fluid signal, similar to fluid signal</p> <p><b><u>Signal size within proximal epiphysis:</u></b> absent, &lt;25%, 25-50%, &gt;50%</p> <p><b><u>Signal size within proximal metaphysis:</u></b> absent, &lt;25%, 25-50%, &gt;50%,</p> <p><b><u>Signal size within diaphysis:</u></b> absent, &lt;25%, 25-50%, &gt;50%; contiguous?</p> <p><b><u>Signal size within distal metaphysis:</u></b> absent, &lt;25%, 25-50%, &gt;50%</p> <p><b><u>Signal size within distal epiphysis:</u></b> absent, &lt;25%, 25-50%, &gt;50%</p> <p><b><u>Soft tissue/periosteal hyperintensity:</u></b> absent, present</p> <p><b><u>Bony expansion:</u></b> absent, present</p> <p>Only mark if confidence is <i>low</i> or <i>medium</i>, sites: _____</p><br><p><b><u>Complex bone (scapula<sup>\$</sup>, pelvis<sup>#</sup>, sacrum<sup>*</sup>, mandible<sup>&amp;</sup>, skull<sup>\$</sup>) or truncal long bones (clavicle<sup>\$</sup>, rib<sup>\$</sup>, manubrium/sterna<sup>\$</sup>) and patella<sup>\$</sup> template:</u></b></p> <p>Lesion site: <input style="width: 50px;" type="text"/> Right, Left</p> <p><b><u>Bone marrow hyperintensity:</u></b> absent, &lt;fluid signal, similar to fluid signal</p> <p><b><u>Signal size:</u></b> absent, &lt;25%, 25-50%, &gt;50%, present (not gradable due to artifact), <b><u>extends to adjacent contiguous bone?</u></b> If so, please write the name of site _____ and the size _____</p> <p><b><u>Soft tissue/periosteal hyperintensity:</u></b> absent, present</p> <p><b><u>Bony expansion:</u></b> absent, present</p> <p>Only mark if confidence is <i>low</i> or <i>medium</i>, sites: _____</p><br><p><b><u>Hand/feet template:</u></b></p> <p>Lesion site: <input style="width: 50px;" type="text"/> Right, Left</p> <p><b><u>Bone marrow hyperintensity:</u></b> absent, &lt;fluid signal, similar to fluid signal</p> <p><b><u>Signal size:</u></b> absent, &lt;25%, 25-50%, &gt;50%, present (not gradable due to artifact),</p> <p><b><u># of bones with edema:</u></b> _____, <b><u>specific bones:</u></b> _____</p> <p><b><u>Soft tissue/periosteal hyperintensity:</u></b> absent, present</p> <p><b><u>Bony expansion:</u></b> absent, present</p> <p>Only mark if confidence is <i>low</i> or <i>medium</i>, sites: _____</p><br><p><b><u>Cervical/thoracic/lumbar spine (Vertebral body) template:</u></b></p> <p>Lesion site: <input style="width: 50px;" type="text"/> (i.e. C2, T5, L3)</p> <p><b><u>Bone marrow hyperintensity:</u></b> absent, &lt;fluid signal, similar to fluid signal</p> <p><b><u>Signal size:</u></b> absent, &lt;25%, 25-50%, &gt;50%, present (not gradable due to artifact), <b><u>involving posterior and/or lateral elements?</u></b></p> <p><b><u>Soft tissue/periosteal hyperintensity:</u></b> absent, present</p> <p><b><u>Bony expansion:</u></b> absent, present</p> <p><b><u>Compression:</u></b> absent, height loss, plana</p> <p>Only mark if confidence is <i>low</i> or <i>medium</i>, sites: _____</p> | <p><b><u>Long bones (extremities) Template:</u></b></p> <p>Lesion site: <input style="width: 50px;" type="text"/> Right, Left</p> <p><b><u>Bone marrow hyperintensity:</u></b> absent, &lt;fluid signal, similar to fluid signal</p> <p><b><u>Signal size within proximal epiphysis:</u></b> absent, &lt;25%, 25-50%, &gt;50%</p> <p><b><u>Signal size within proximal metaphysis:</u></b> absent, &lt;25%, 25-50%, &gt;50%,</p> <p><b><u>Signal size within diaphysis:</u></b> absent, &lt;25%, 25-50%, &gt;50%; contiguous?</p> <p><b><u>Signal size within distal metaphysis:</u></b> absent, &lt;25%, 25-50%, &gt;50%</p> <p><b><u>Signal size within distal epiphysis:</u></b> absent, &lt;25%, 25-50%, &gt;50%</p> <p><b><u>Soft tissue/periosteal hyperintensity:</u></b> absent, present</p> <p><b><u>Bony expansion:</u></b> absent, present</p> <p>Only mark if confidence is <i>low</i> or <i>medium</i>, sites: _____</p><br><p><b><u>Long bones (extremities) Template:</u></b></p> <p>Lesion site: <input style="width: 50px;" type="text"/> Right, Left</p> <p><b><u>Bone marrow hyperintensity:</u></b> absent, &lt;fluid signal, similar to fluid signal</p> <p><b><u>Signal size within proximal epiphysis:</u></b> absent, &lt;25%, 25-50%, &gt;50%</p> <p><b><u>Signal size within proximal metaphysis:</u></b> absent, &lt;25%, 25-50%, &gt;50%,</p> <p><b><u>Signal size within diaphysis:</u></b> absent, &lt;25%, 25-50%, &gt;50%; contiguous?</p> <p><b><u>Signal size within distal metaphysis:</u></b> absent, &lt;25%, 25-50%, &gt;50%</p> <p><b><u>Signal size within distal epiphysis:</u></b> absent, &lt;25%, 25-50%, &gt;50%</p> <p><b><u>Soft tissue/periosteal hyperintensity:</u></b> absent, present</p> <p><b><u>Bony expansion:</u></b> absent, present</p> <p>Only mark if confidence is <i>low</i> or <i>medium</i>, sites: _____</p><br><p><b><u>Complex bone (scapula<sup>\$</sup>, pelvis<sup>#</sup>, sacrum<sup>*</sup>, mandible<sup>&amp;</sup>, skull<sup>\$</sup>) or truncal long bones (clavicle<sup>\$</sup>, rib<sup>\$</sup>, manubrium/sterna<sup>\$</sup>) and patella<sup>\$</sup> template:</u></b></p> <p>Lesion site: <input style="width: 50px;" type="text"/> Right, Left</p> <p><b><u>Bone marrow hyperintensity:</u></b> absent, &lt;fluid signal, similar to fluid signal</p> <p><b><u>Signal size:</u></b> absent, &lt;25%, 25-50%, &gt;50%, present (not gradable due to artifact), <b><u>extends to adjacent contiguous bone?</u></b> If so, please write the name of site _____ and the size _____</p> <p><b><u>Soft tissue/periosteal hyperintensity:</u></b> absent, present</p> <p><b><u>Bony expansion:</u></b> absent, present</p> <p>Only mark if confidence is <i>low</i> or <i>medium</i>, sites: _____</p><br><p><b><u>Hand/feet template:</u></b></p> <p>Lesion site: <input style="width: 50px;" type="text"/> Right, Left</p> <p><b><u>Bone marrow hyperintensity:</u></b> absent, &lt;fluid signal, similar to fluid signal</p> <p><b><u>Signal size:</u></b> absent, &lt;25%, 25-50%, &gt;50%, present (not gradable due to artifact),</p> <p><b><u># of bones with edema:</u></b> _____, <b><u>specific bones:</u></b> _____</p> <p><b><u>Soft tissue/periosteal hyperintensity:</u></b> absent, present</p> <p><b><u>Bony expansion:</u></b> absent, present</p> <p>Only mark if confidence is <i>low</i> or <i>medium</i>, sites: _____</p><br><p><b><u>Cervical/thoracic/lumbar spine (Vertebral body) template:</u></b></p> <p>Lesion site: <input style="width: 50px;" type="text"/> (i.e. C2, T5, L3)</p> <p><b><u>Bone marrow hyperintensity:</u></b> absent, &lt;fluid signal, similar to fluid signal</p> <p><b><u>Signal size:</u></b> absent, &lt;25%, 25-50%, &gt;50%, present (not gradable due to artifact), <b><u>involving posterior and/or lateral elements?</u></b></p> <p><b><u>Soft tissue/periosteal hyperintensity:</u></b> absent, present</p> <p><b><u>Bony expansion:</u></b> absent, present</p> <p><b><u>Compression:</u></b> absent, height loss, plana</p> <p>Only mark if confidence is <i>low</i> or <i>medium</i>, sites: _____</p> |
|----------------------------------------------------------------------------------------------------------------------------------------------------------------------------------------------------------------------------------------------------------------------------------------------------------------------------------------------------------------------------------------------------------------------------------------------------------------------------------------------------------------------------------------------------------------------------------------------------------------------------------------------------------------------------------------------------------------------------------------------------------------------------------------------------------------------------------------------------------------------------------------------------------------------------------------------------------------------------------------------------------------------------------------------------------------------------------------------------------------------------------------------------------------------------------------------------------------------------------------------------------------------------------------------------------------------------------------------------------------------------------------------------------------------------------------------------------------------------------------------------------------------------------------------------------------------------------------------------------------------------------------------------------------------------------------------------------------------------------------------------------------------------------------------------------------------------------------------------------------------------------------------------------------------------------------------------------------------------------------------------------------------------------------------------------------------------------------------------------------------------------------------------------------------------------------------------------------------------------------------------------------------------------------------------------------------------------------------------------------------------------------------------------------------------------------------------------------------------------------------------------------------------------------------------------------------------------------------------------------------------------------------------------------------------------------------------------------------------------------------------------------------------------------------------------------------------------------------------------------------------------------------------------------------------------------------------------------------------------------------------------------------------------------------------------------------------------------------------------------------------------------------------------------------------------------------------------------------------------------------------------------------------------------------------------------------------------------------------------------------------------------------------------------------------------------------------------------------------------------------------------------------------------------------------------------------------------------------------------------------------------------------------------------------------------------------------------------------------------------------------------------------------------------------------------------------------------------------------------------------------------------------------------------------------------------------------------------------------------------------------------------------------------------------------------------------------------------------------------------------------------------------------------|----------------------------------------------------------------------------------------------------------------------------------------------------------------------------------------------------------------------------------------------------------------------------------------------------------------------------------------------------------------------------------------------------------------------------------------------------------------------------------------------------------------------------------------------------------------------------------------------------------------------------------------------------------------------------------------------------------------------------------------------------------------------------------------------------------------------------------------------------------------------------------------------------------------------------------------------------------------------------------------------------------------------------------------------------------------------------------------------------------------------------------------------------------------------------------------------------------------------------------------------------------------------------------------------------------------------------------------------------------------------------------------------------------------------------------------------------------------------------------------------------------------------------------------------------------------------------------------------------------------------------------------------------------------------------------------------------------------------------------------------------------------------------------------------------------------------------------------------------------------------------------------------------------------------------------------------------------------------------------------------------------------------------------------------------------------------------------------------------------------------------------------------------------------------------------------------------------------------------------------------------------------------------------------------------------------------------------------------------------------------------------------------------------------------------------------------------------------------------------------------------------------------------------------------------------------------------------------------------------------------------------------------------------------------------------------------------------------------------------------------------------------------------------------------------------------------------------------------------------------------------------------------------------------------------------------------------------------------------------------------------------------------------------------------------------------------------------------------------------------------------------------------------------------------------------------------------------------------------------------------------------------------------------------------------------------------------------------------------------------------------------------------------------------------------------------------------------------------------------------------------------------------------------------------------------------------------------------------------------------------------------------------------------------------------------------------------------------------------------------------------------------------------------------------------------------------------------------------------------------------------------------------------------------------------------------------------------------------------------------------------------------------------------------------------------------------------------------------------------------------------------------------------------|

Supplement 2.

# CRMO/CNO MRI Scoring Atlas

Pediatric Radiology & Rheumatology  
CRMO Imaging Consortium

# Disclaimer

- This atlas is designed for research use only

# Content

- A group of pediatric radiologists and rheumatologists have developed a CRMO MRI scoring tool for research purposes
- This video will walk you through examples of CRMO lesions from different bones and how they are scored

# Recommended WBMRI Protocol

- Planes (all preformed as STIR)
  - Sagittal total spine – in 2 stations
  - Coronal total body (from Vertex to feet) – in 4 to 5 stations
    - Prone positioning of the upper extremities by side
  - Axial Pelvis
  - Axial Knees
  - Sagittal Feet
  - Fused coronal whole body
- Regional imaging (e.g., axial skull for mandibular lesion) as needed

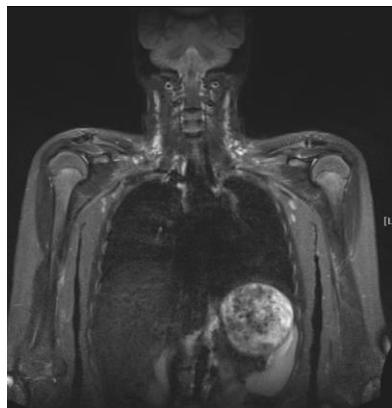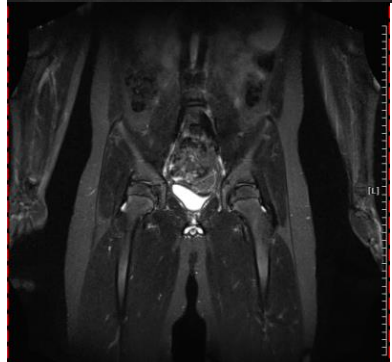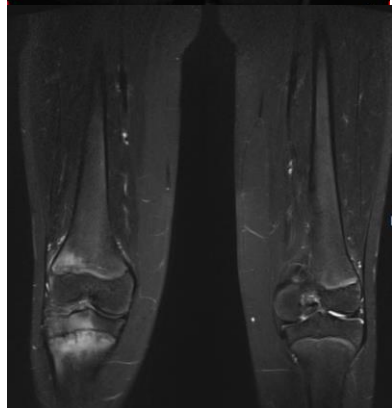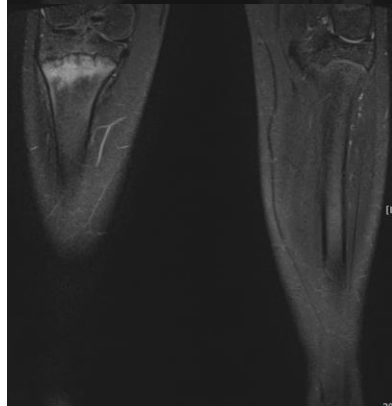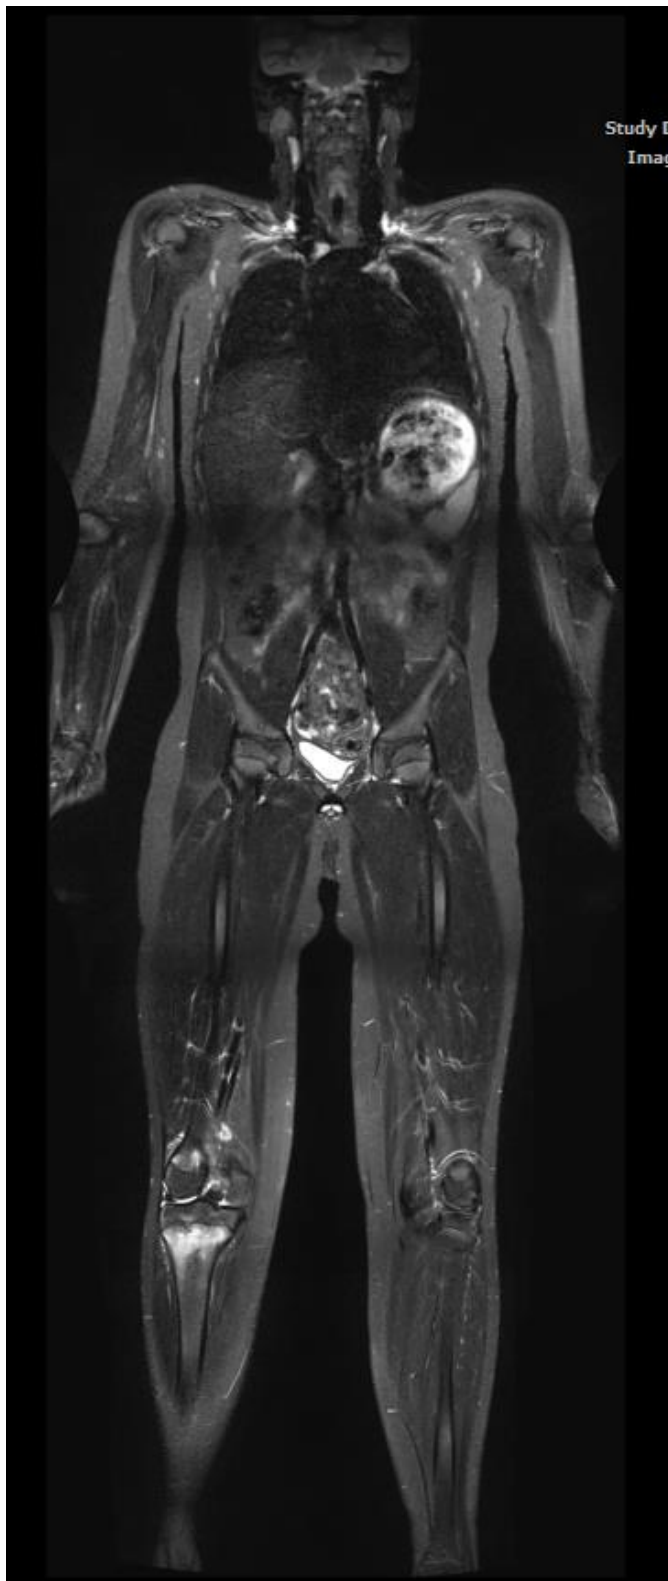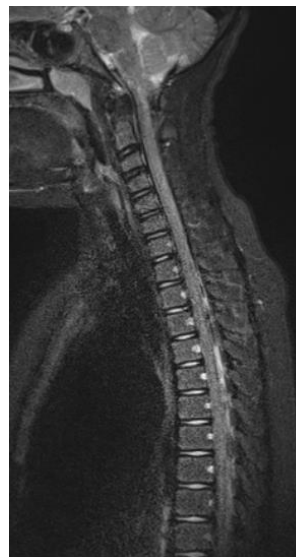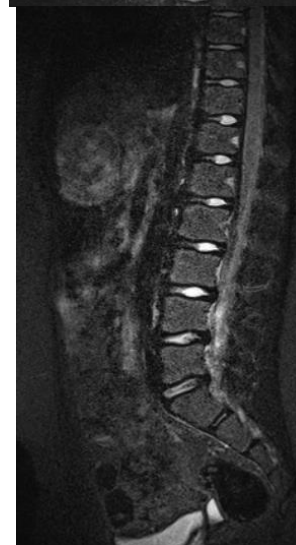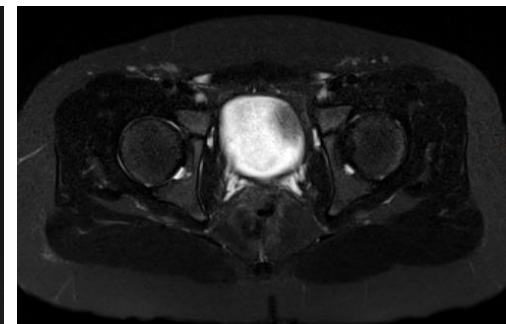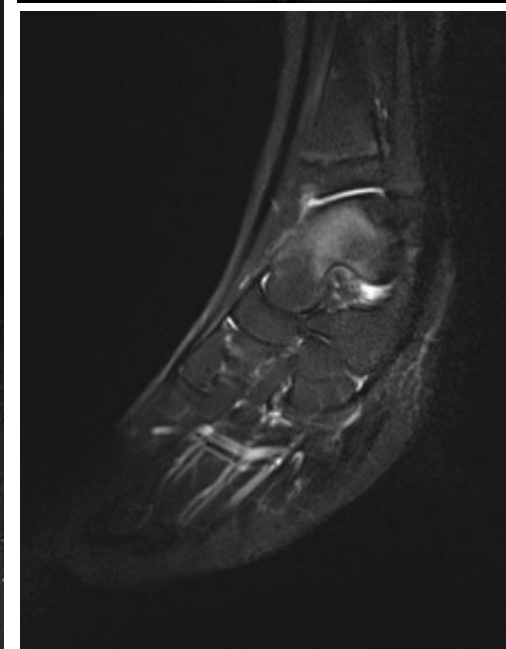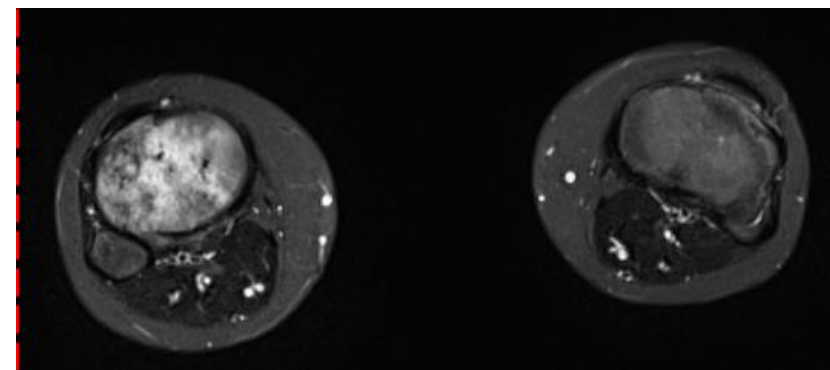

# Skull

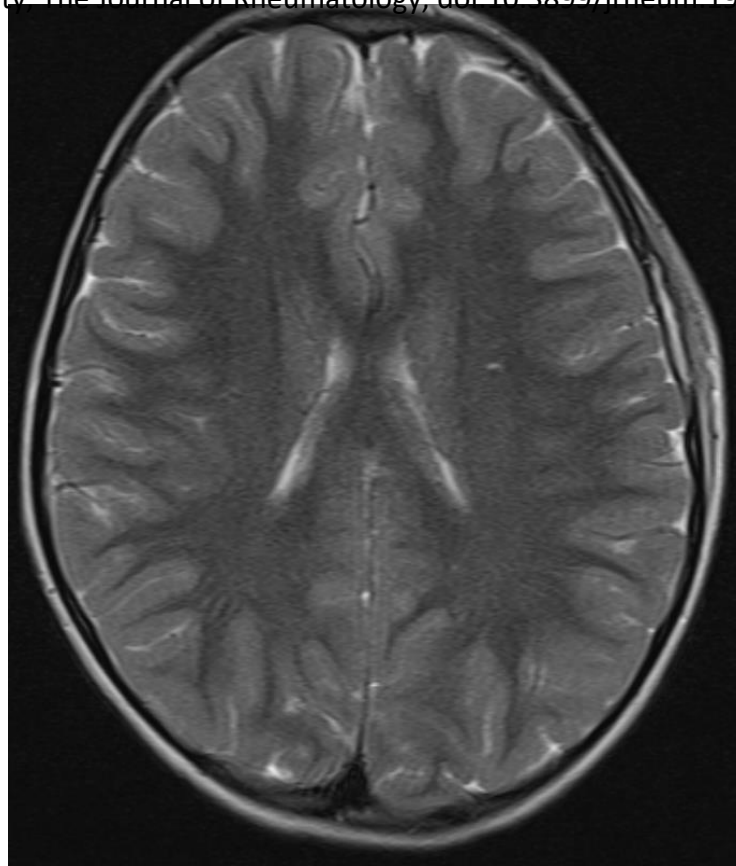

(T2) – left parietal lesion

**Signal site:** Skull (left parietal)

**Bone marrow hyperintensity:** absent, < fluid signal, similar to fluid signal

**Signal size:** absent, <25%, 25-50%, >50%, present (not gradable secondary to artifact)

**Soft tissue or periosteal hyperintensity:** absent, present

**Bony expansion:** absent, present

# Mandible

- **Signal site:** Mandible, R
- **Bone marrow hyperintensity:** absent, < fluid signal, similar to fluid signal
- **Signal size:** absent, <25%, 25-50%, >50%, present (unable to grade due to artifact)
- **Soft tissue/periosteal hyperintensity:** absent, present
- **Bony expansion:** absent, present

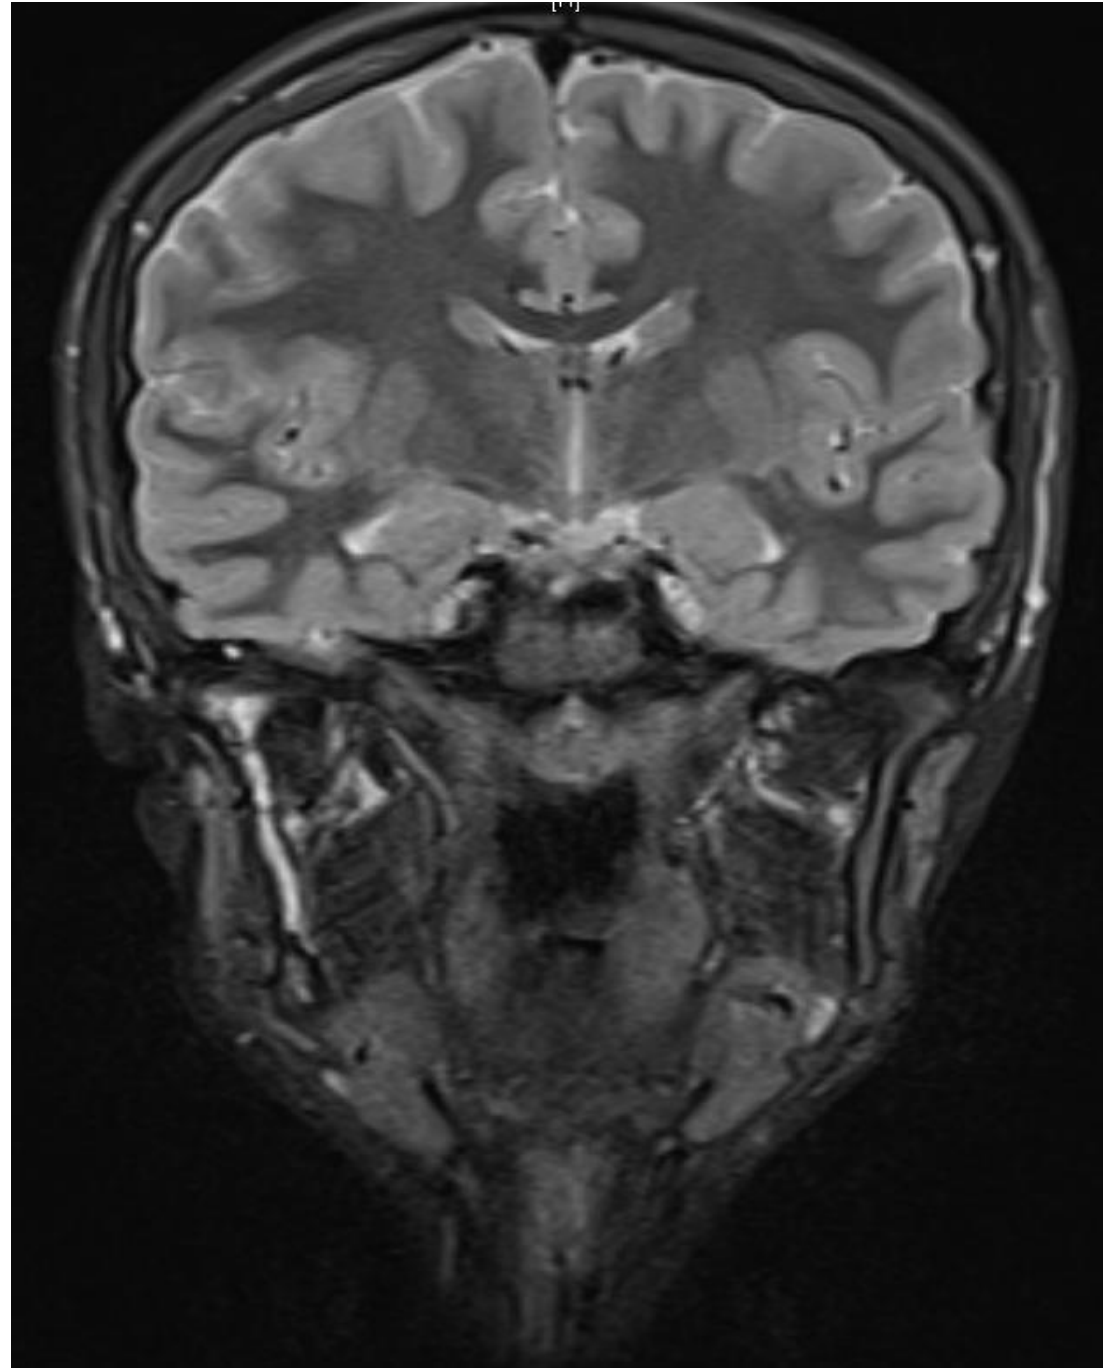

# Mandible

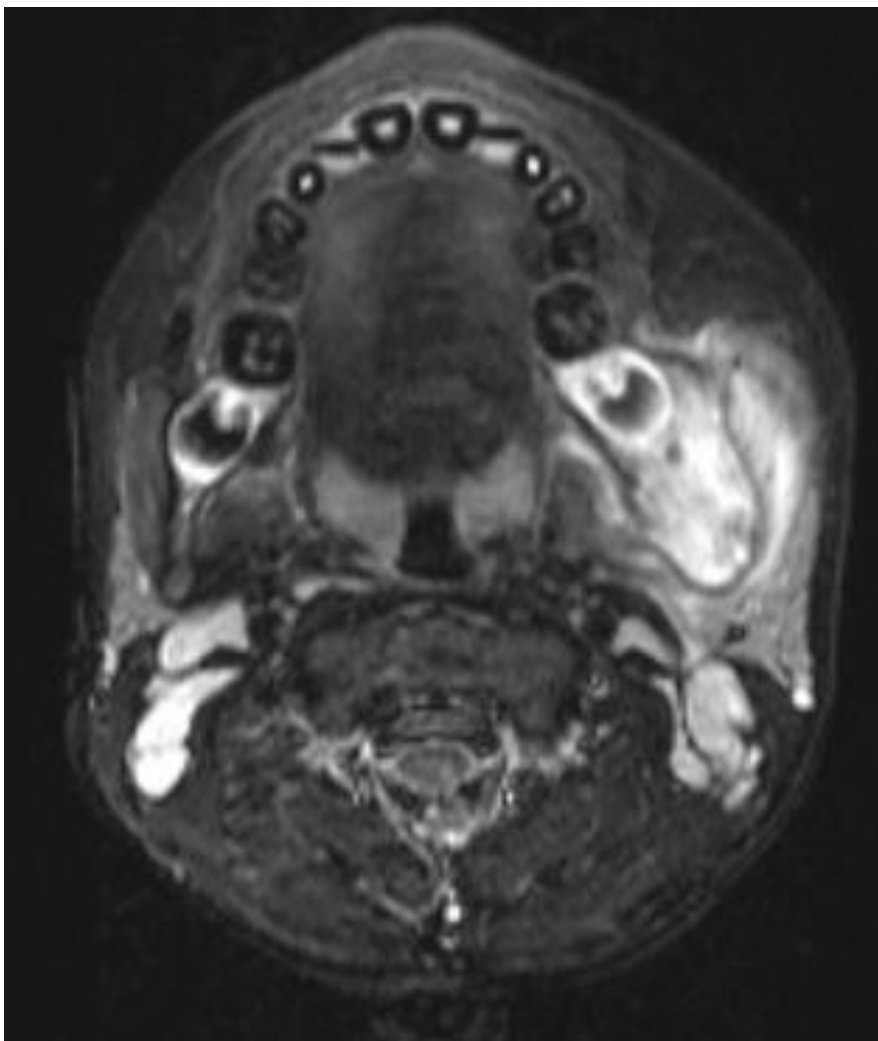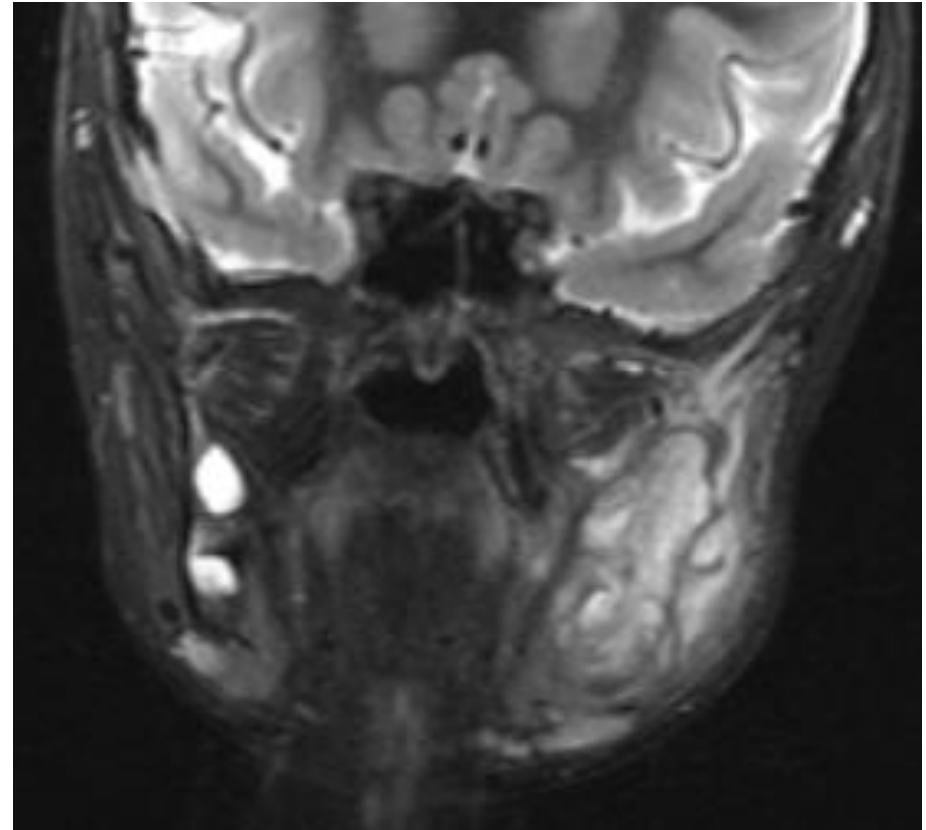

- **Signal site:** Mandible, L
- **Bone marrow hyperintensity:** absent, < fluid signal, similar to fluid signal
- **Signal size:** absent, <25%, 25-50%, >50%, present (unable to grade due to artifact)
- **Soft tissue/periosteal hyperintensity:** absent, present
- **Bony expansion:** absent, present

# Clavicle

**Signal Site:** Clavicle, R

**Bone marrow hyperintensity:**

absent, < fluid signal, similar to fluid signal

**Signal size:** absent, <25%, 25-50%, >50%, present (not gradable secondary to artifact)

**Soft tissue/periosteal**

**hyperintensity:** absent, present

**Bony expansion:** absent, present

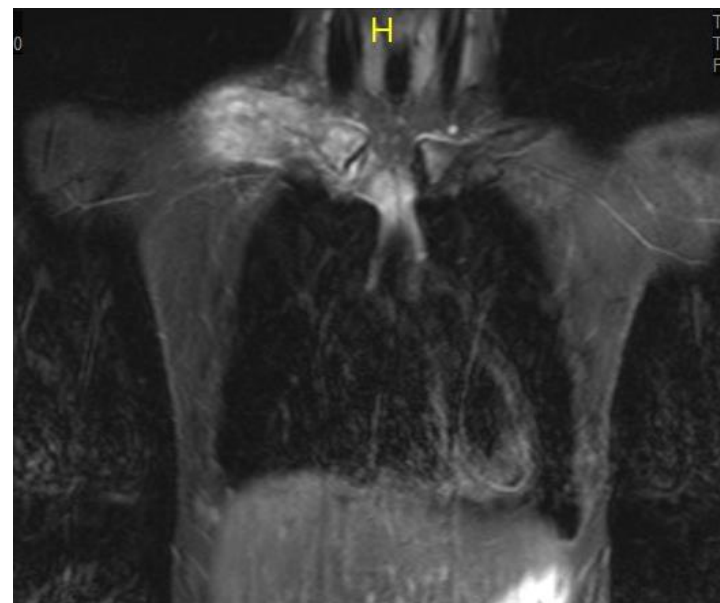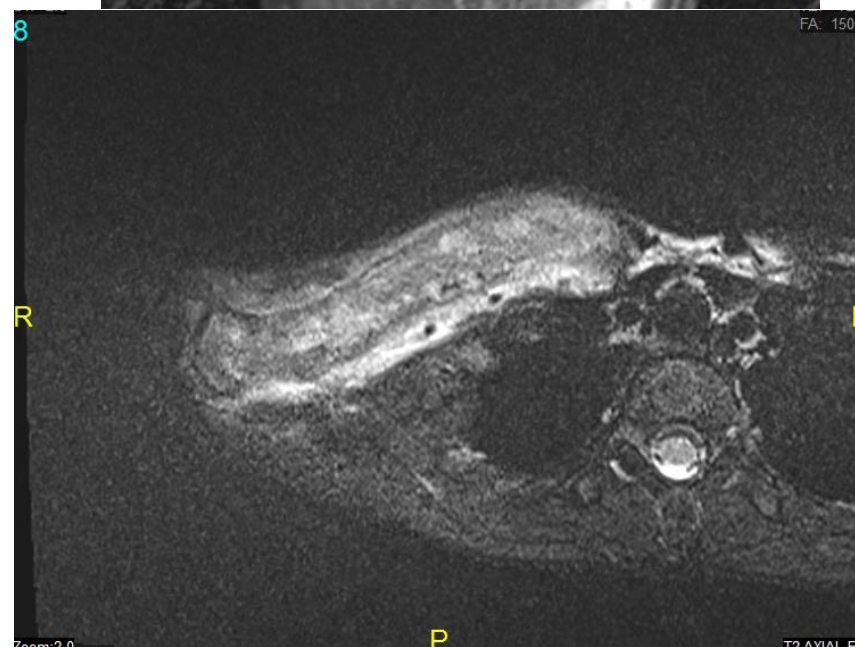

# Scapula

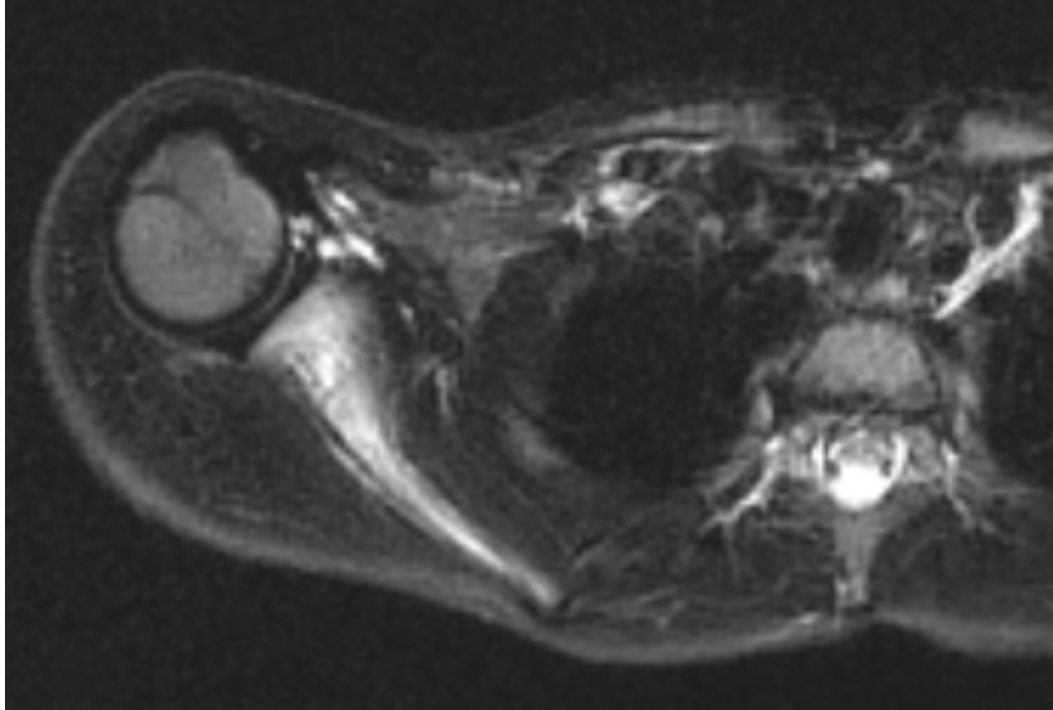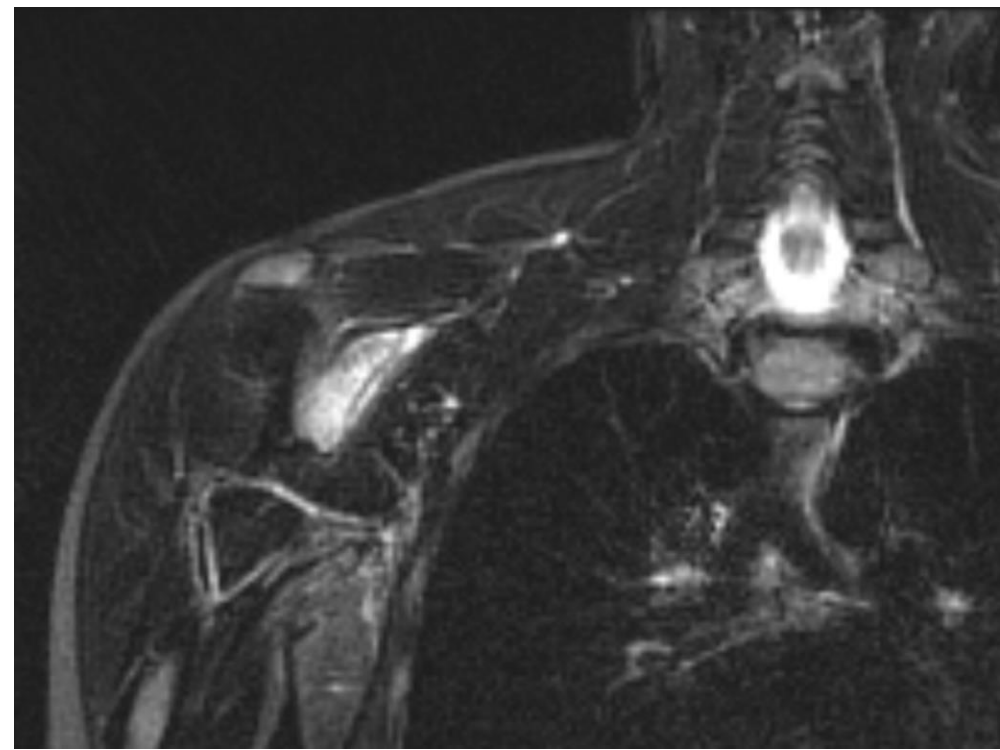

**Signal site:** scapula Right, Left

**Bone marrow hyperintensity:** absent, < fluid signal, similar to fluid signal

**Signal size:** absent, <25%, 25-50%, >50%, present (not gradable secondary to artifact)

**Soft tissue or periosteal hyperintensity:** absent, present

**Bony expansion:** absent, present

# Rib

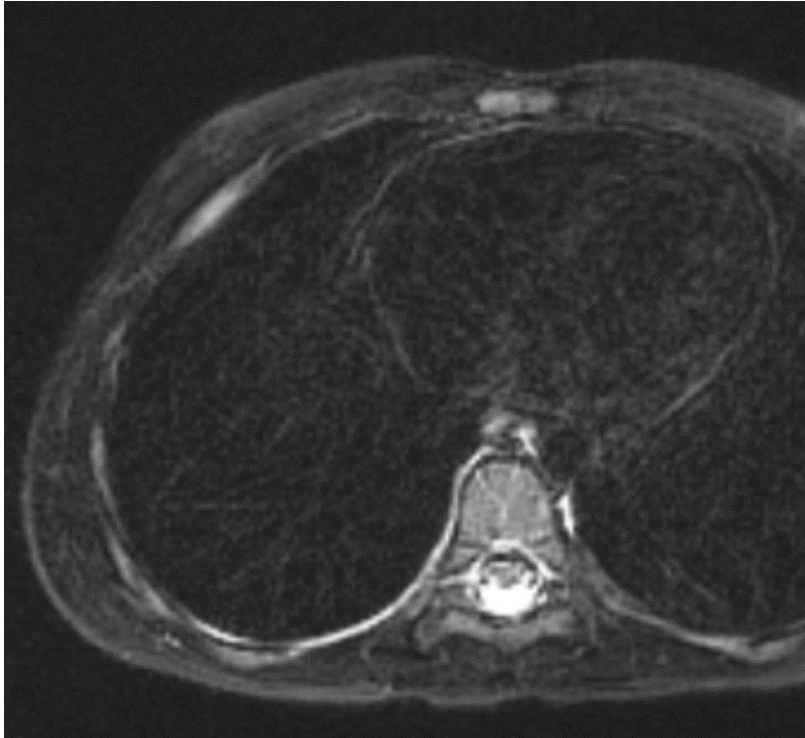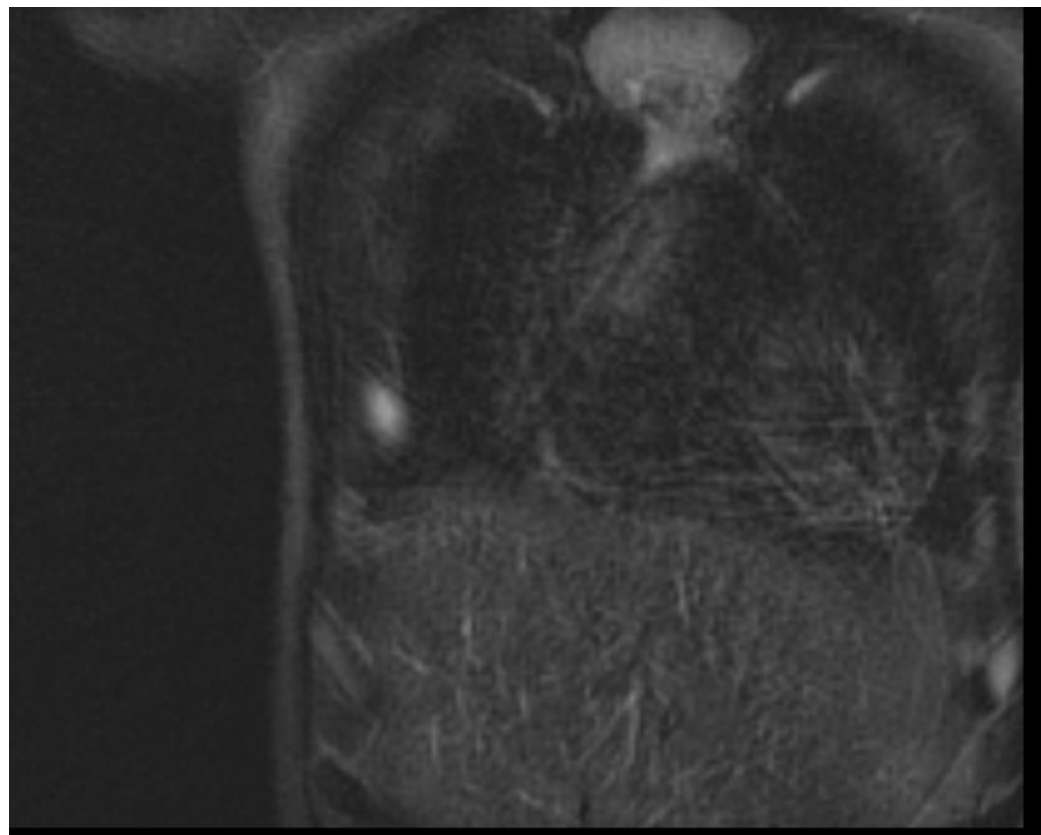

The abnormality in this patient was limited to that seen on these images (i.e. less than 25%), the remainder of this rib was normal.

**Signal site:** Rib A, Right, Left

**Bone marrow hyperintensity:** absent, < fluid signal, similar to fluid signal

**Signal size:** absent, <25%, 25-50%, >50%, present (not gradable secondary to artifact)

**Soft tissue or periosteal hyperintensity:** absent, present

**Bony expansion:** absent, present

# Sternum

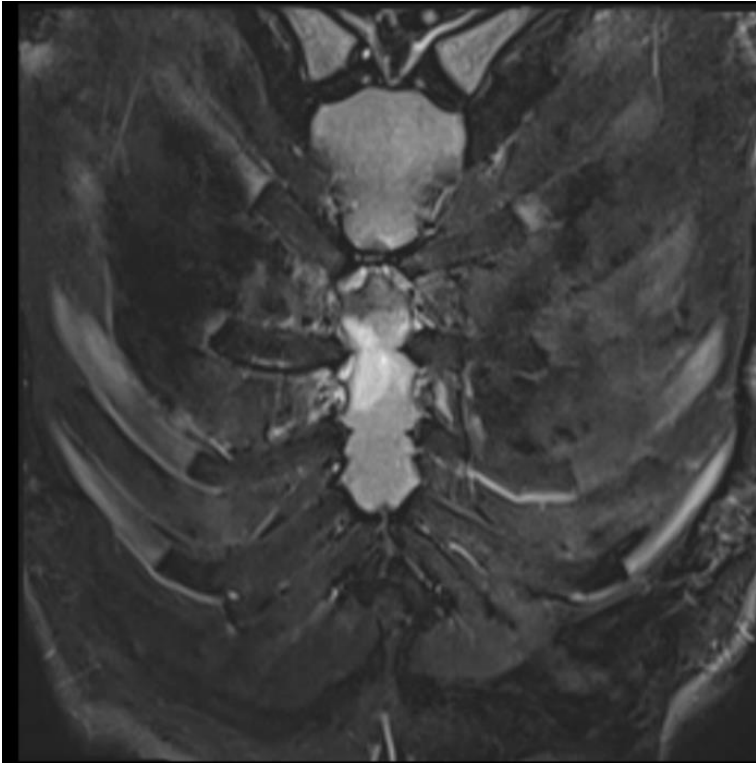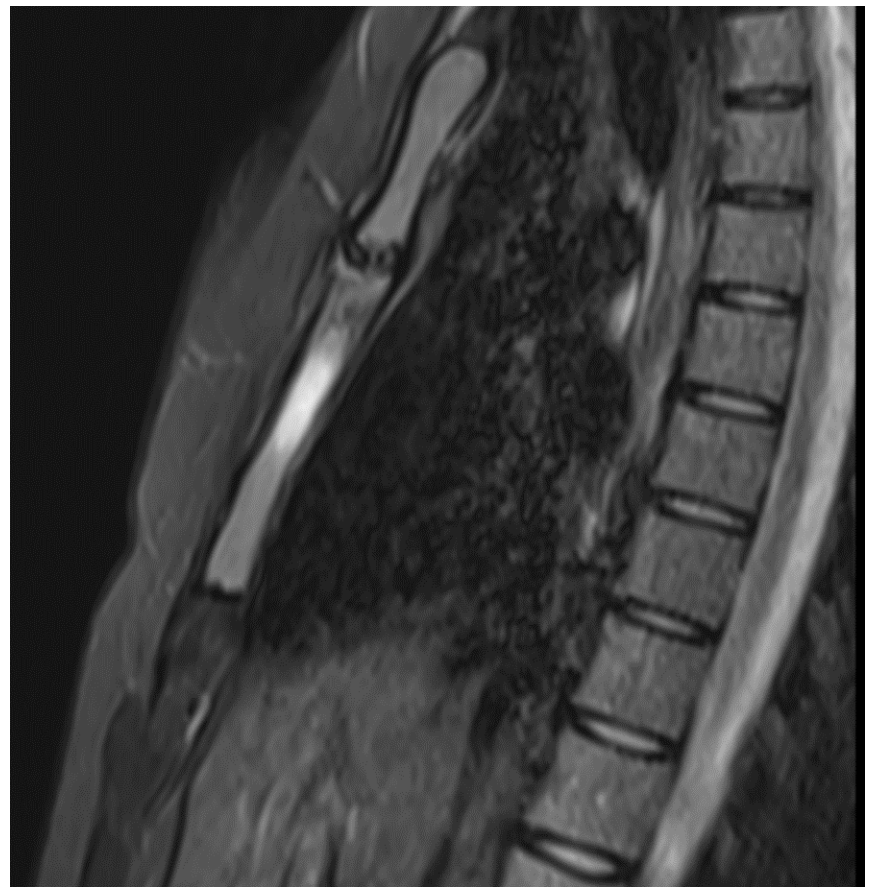

**Signal site:** Sternum

**Bone marrow hyperintensity:** absent, < fluid signal, similar to fluid signal

**Signal size:** absent, <25% (of entire manubrium+sternum), 25-50%, >50%, present (not gradable secondary to artifact)--

**-Soft tissue or periosteal hyperintensity:** absent, present

**Bony expansion:** absent, present

# Site: C spine

**Signal site:** C7 (i.e. C2, T5, L3)

**Bone marrow hyperintensity:** absent, < fluid signal, similar to fluid signal

**Signal size:** <25%, 25-50%, >50%, present (not gradable due to artifact)

**Soft tissue/periosteal hyperintensity:** absent, present

**Periosteal reaction:** absent, present

**Bony expansion:** absent, present

**Spinal compression:**

Site: C7, height loss, plana

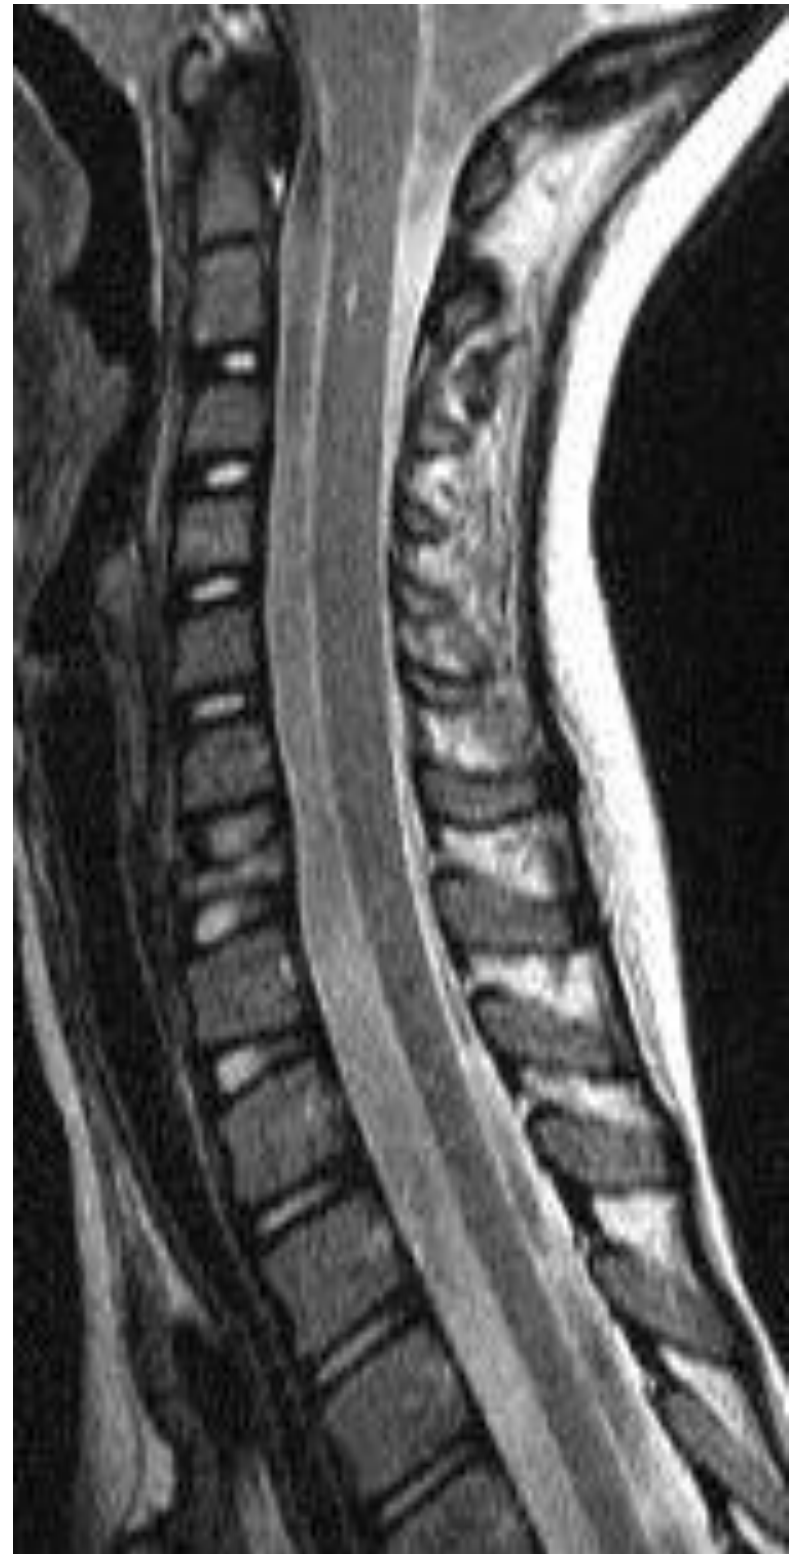

# Site: T spine

**Signal site:** T6 (i.e. C2, T5, L3)

**Bone marrow hyperintensity: Maximal signal strength:** < fluid signal, similar to fluid signal

**Signal size:** <25%, 25-50%, >50%, present (not gradable)

**Soft tissue/periosteal hyperintensity:** absent, present

**Bony expansion:** absent, present

**Signal site:** T7 (i.e. C2, T5, L3)

**Bone marrow hyperintensity: Maximal signal strength:** < fluid signal, similar to fluid signal

**Signal size:** <25%, 25-50%, >50%, present (not gradable)

**Soft tissue/periosteal hyperintensity:** absent, present

**Bony expansion:** absent, present

**Spinal compression:**

**Site:** T7, height loss, plana

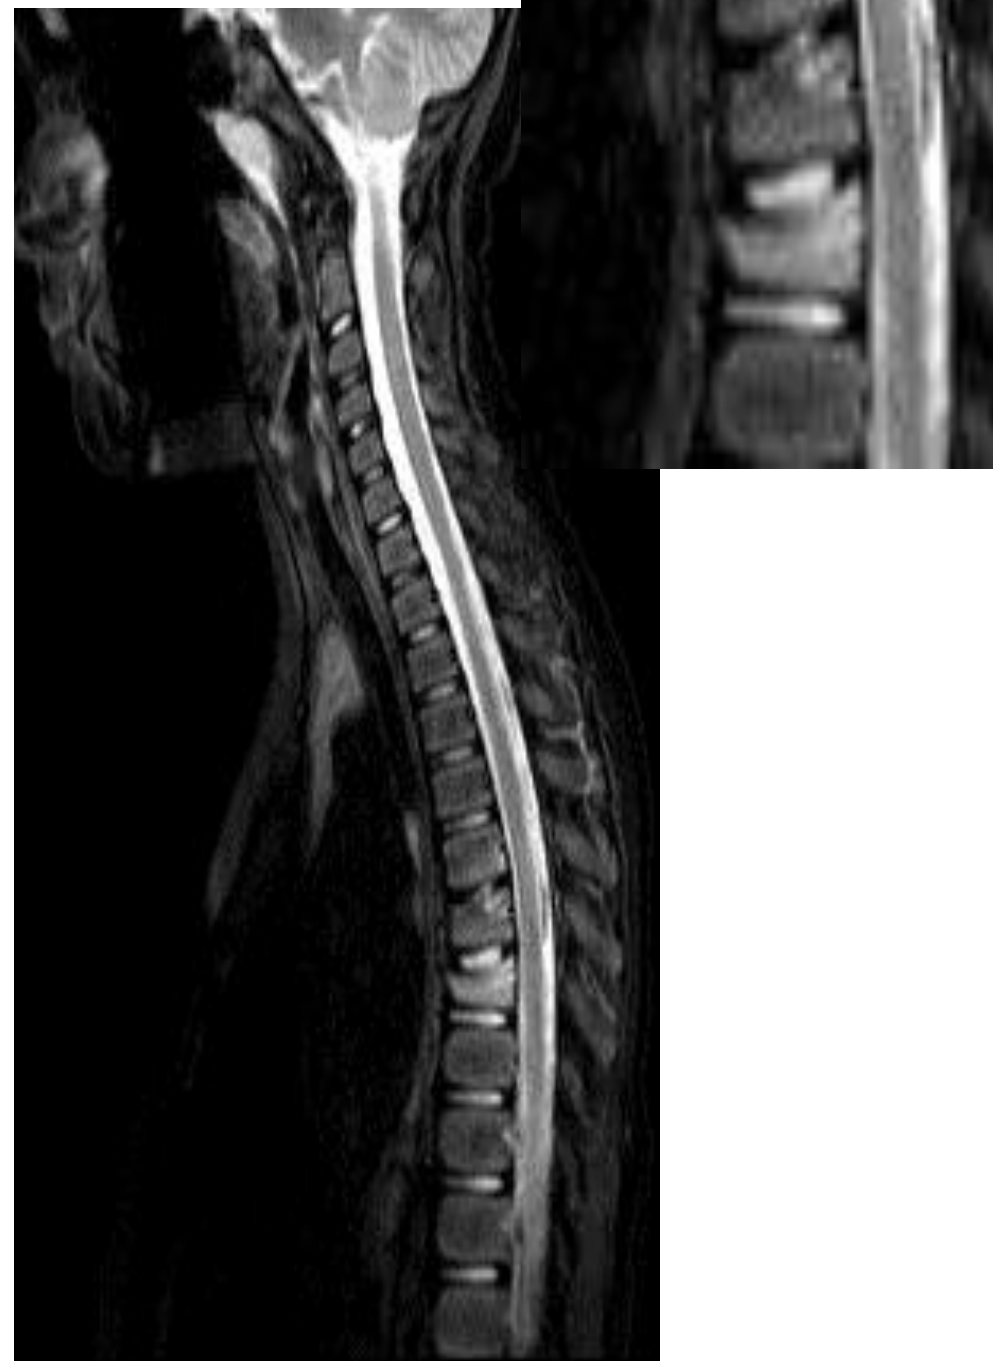

# Pelvis

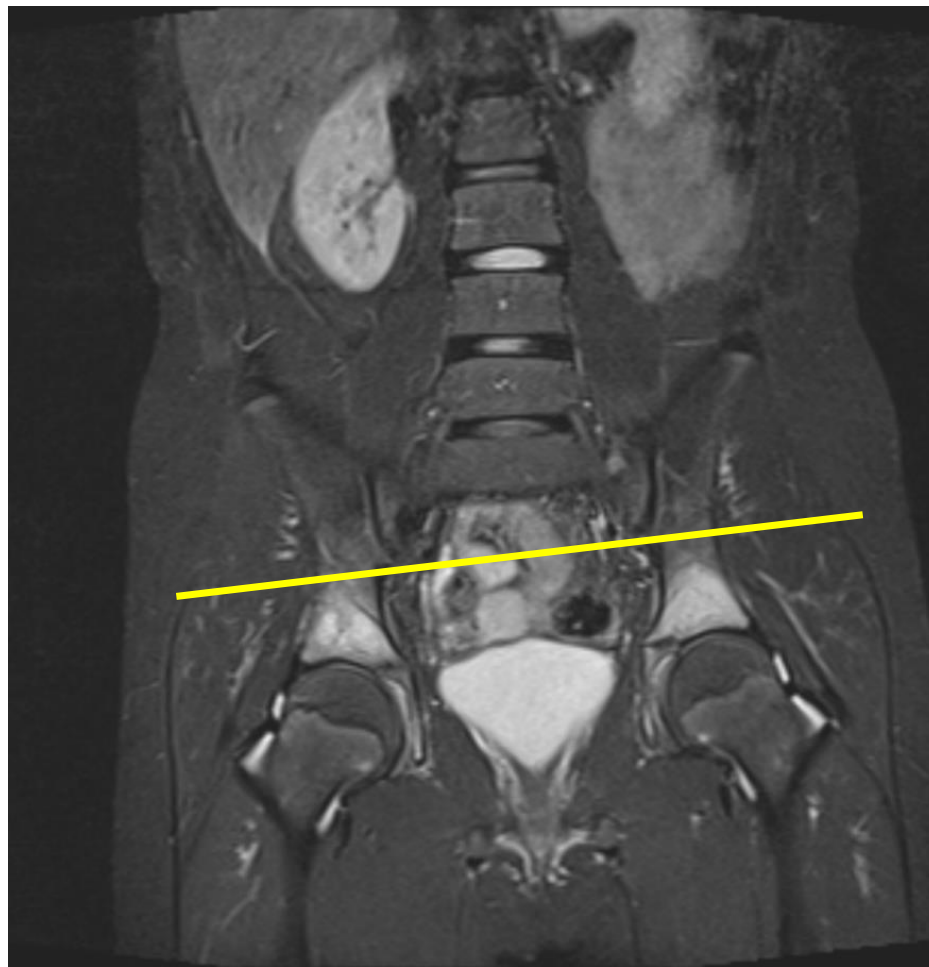

Border between ilium and peri-acetabulum

**Signal site:** periacetabular Right, Left

**Bone marrow hyperintensity:** absent, < fluid signal, similar to fluid signal

**Signal size:** absent, <25%, 25-50%, >50%, present (not gradable secondary to artifact), **extends to adjacent contiguous bone?** If so, please write the **name of site** \_\_\_\_\_ and the **size** \_\_\_\_\_

**Soft tissue/periosteal hyperintensity:** absent, present

**Bony expansion:** absent, present

**Signal site:** periacetabular Right, Left

**Bone marrow hyperintensity:** **Maximal signal strength:** < fluid signal, similar to fluid signal

**Signal size:** absent, <25%, 25-50%, >50%, present (not gradable secondary to artifact), **extends to adjacent contiguous bone?** If so, please write the **name of site** \_\_\_\_\_ and the **size** \_\_\_\_\_

**Soft tissue/periosteal hyperintensity:** absent, present

**Bony expansion:** absent, present

# Pelvis (extended lesion)

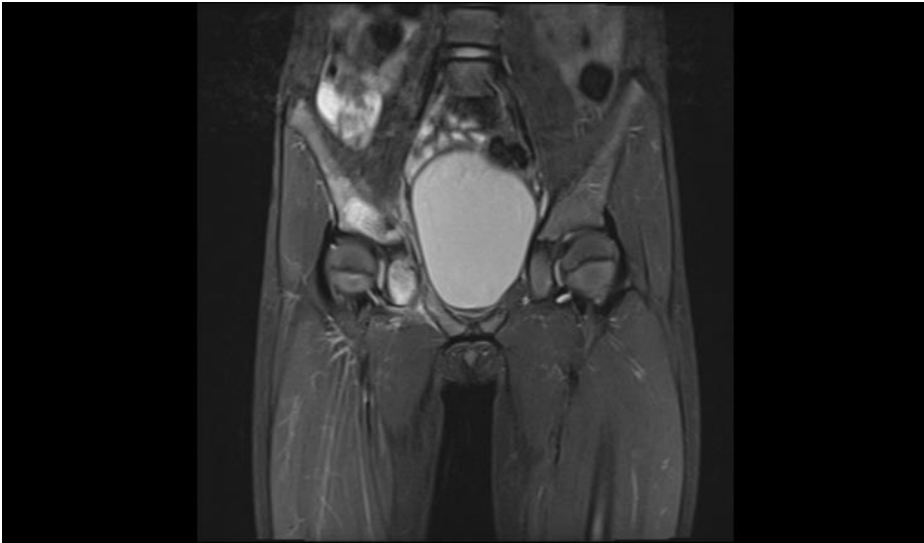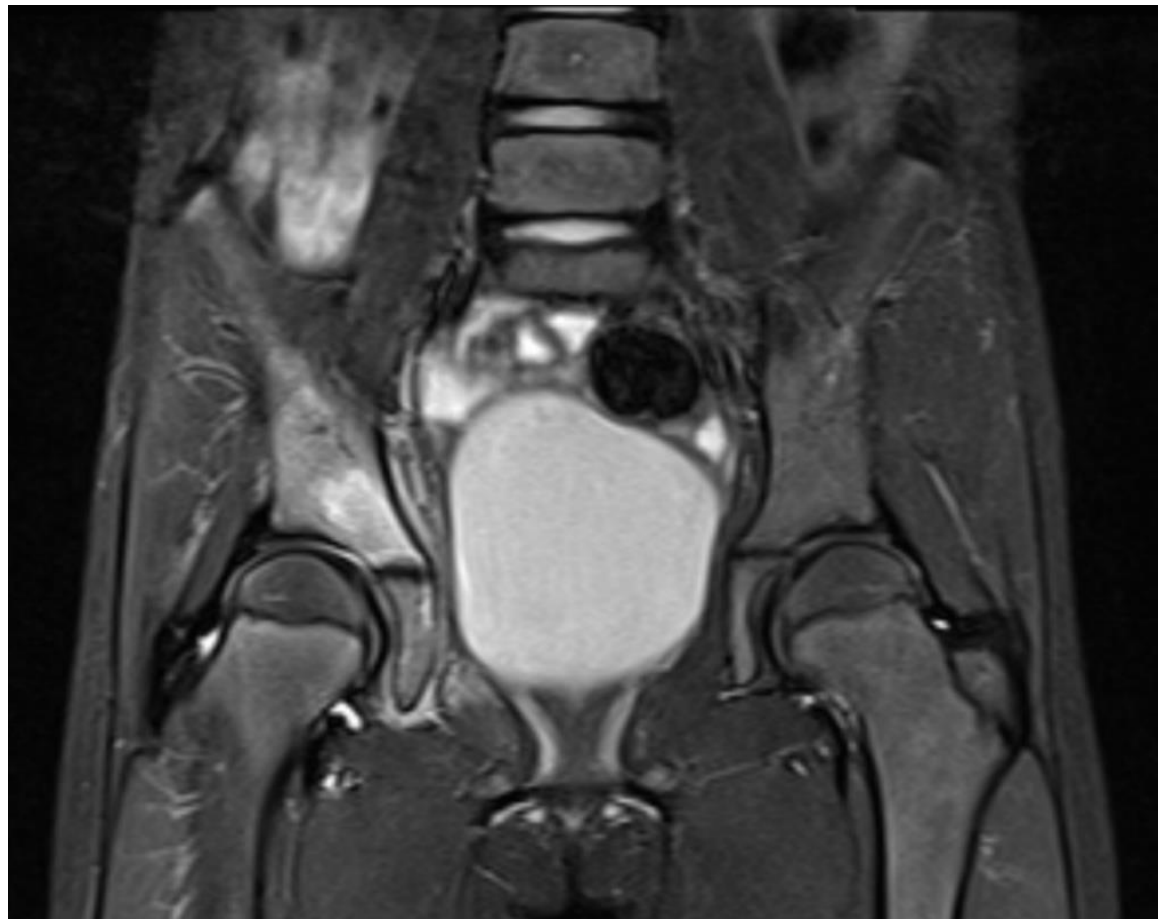

**Signal site:** periacetabular Right, Left

**Bone marrow hyperintensity: Maximal signal strength:** < fluid signal, similar to fluid signal

**Signal size:** absent, <25%, 25-50%, >50%, present (not gradable), extending to adjacent region? If so, please write the name of site ilium and the size <25%

**Soft tissue / periosteal hyperintensity:** absent, present

**Bony expansion:** absent, present

# Pelvis

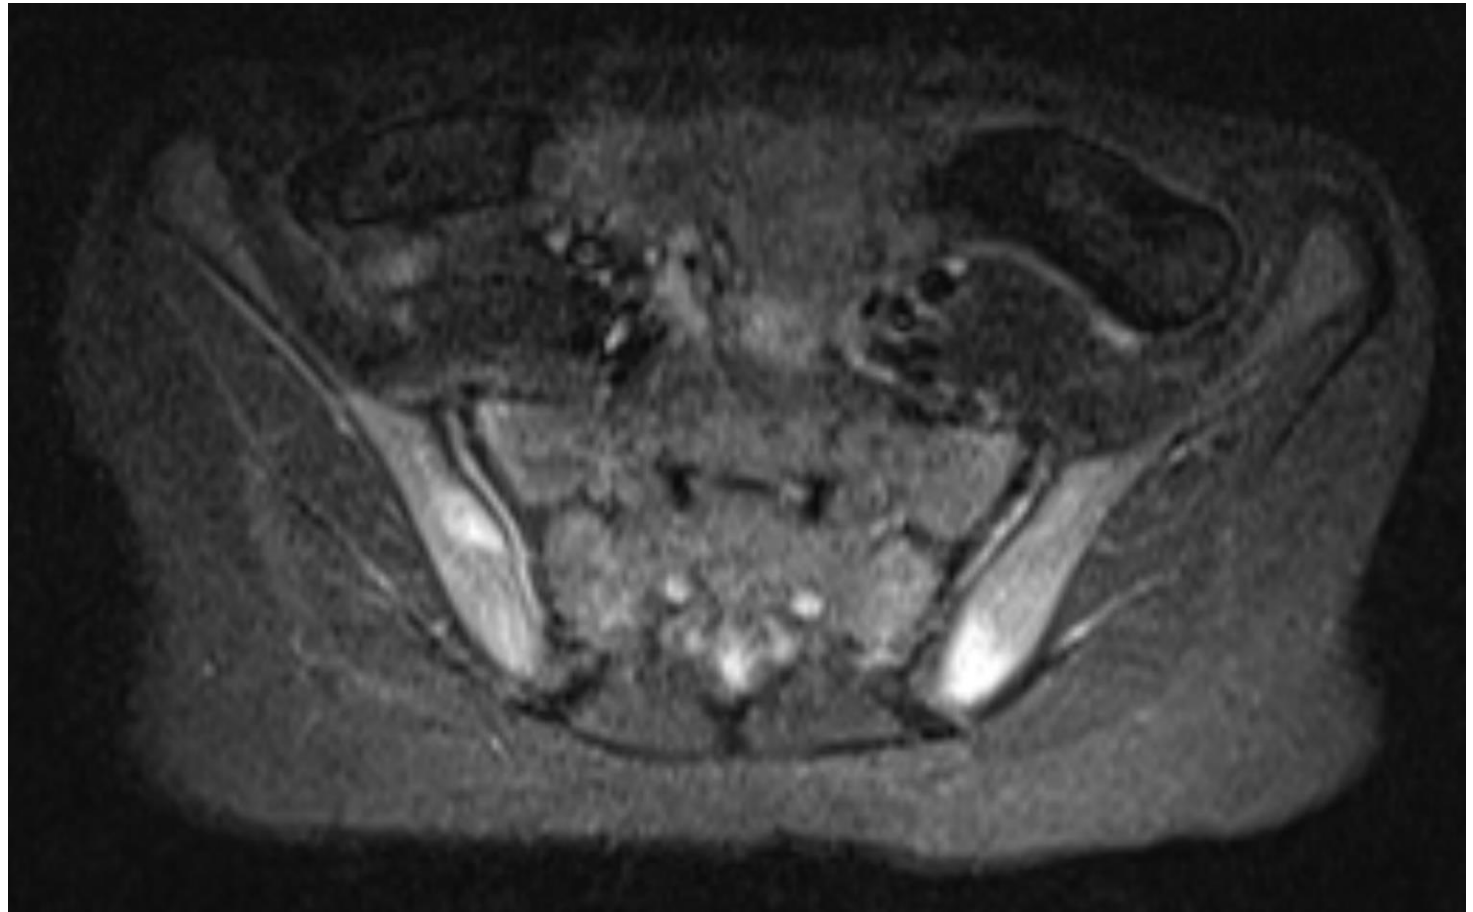

**Signal site:** ilium Right, Left  
**Bone marrow hyperintensity:** absent, < fluid signal, similar to fluid signal  
**Signal size:** absent, <25%, 25-50%, >50%, present (not gradable secondary to artifact), **extends to adjacent contiguous bone?** If so, please write the **name of site** \_\_\_\_\_ and the **size** \_\_\_\_\_  
**Soft tissue/periosteal hyperintensity:** absent, present  
**Bony expansion:** absent, present

**Signal site:** ilium Right, Left  
**Bone marrow hyperintensity:** absent, < fluid signal, similar to fluid signal  
**Signal size:** absent, <25%, 25-50%, >50%, present (not gradable secondary to artifact), **extends to adjacent contiguous bone?** If so, please write the **name of site** \_\_\_\_\_ and the **size** \_\_\_\_\_  
**Soft tissue/periosteal hyperintensity:** absent, present  
**Bony expansion:** absent, present

# Pelvis

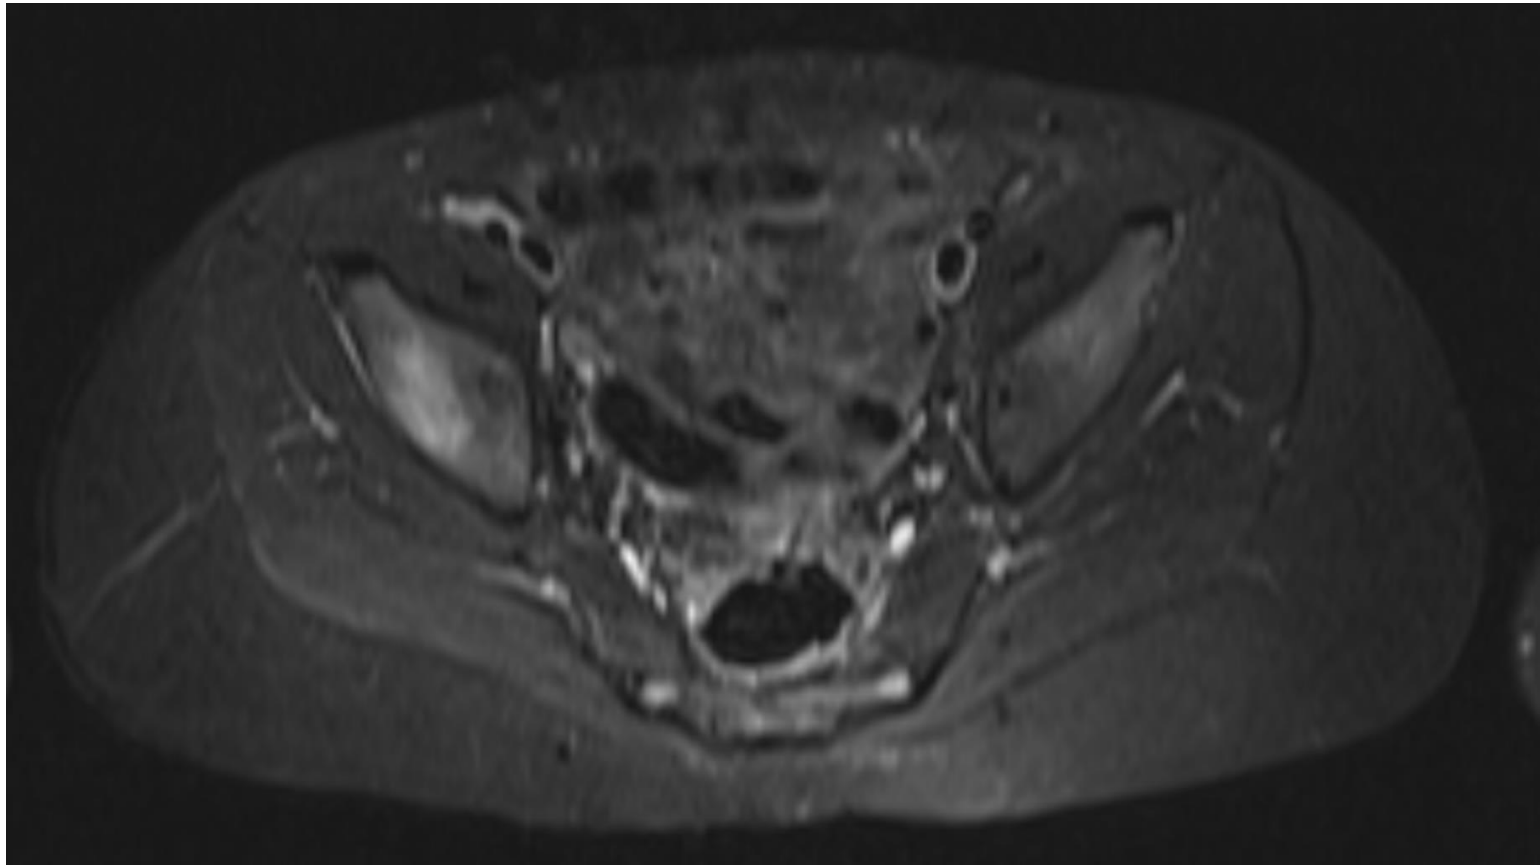

**Signal site:** periacetabular Right, Left

**Bone marrow hyperintensity:** absent, < fluid signal, similar to fluid signal

**Signal size:** absent, <25%, 25-50%, >50%, present (not gradable secondary to artifact),  
**extends to adjacent contiguous bone?** If so, please write the **name of**  
**site**\_\_\_\_\_and the **size**\_\_\_\_\_

**Soft tissue/periosteal hyperintensity:** absent, present

**Bony expansion:** absent, present

# Pelvis

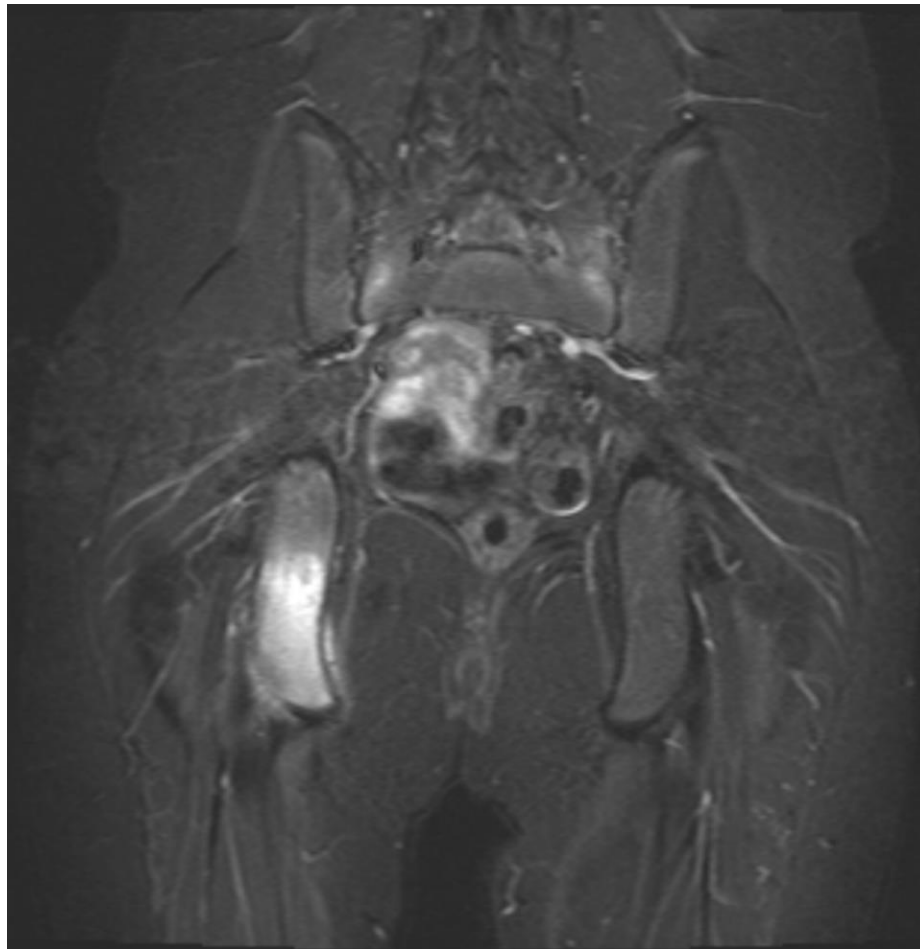

**Signal site:** pubis/ischium Right, Left

**Bone marrow hyperintensity:** absent, < fluid signal, similar to fluid signal

**Signal size:** absent, <25%, 25-50%, >50%, present (not gradable secondary to artifact), **extends to adjacent contiguous bone?** If so, please write the **name of site** \_\_\_\_\_ and the **size** \_\_\_\_\_

**Soft tissue or periosteal hyperintensity:** absent, present

**Bony expansion:** absent, present

# Pelvis

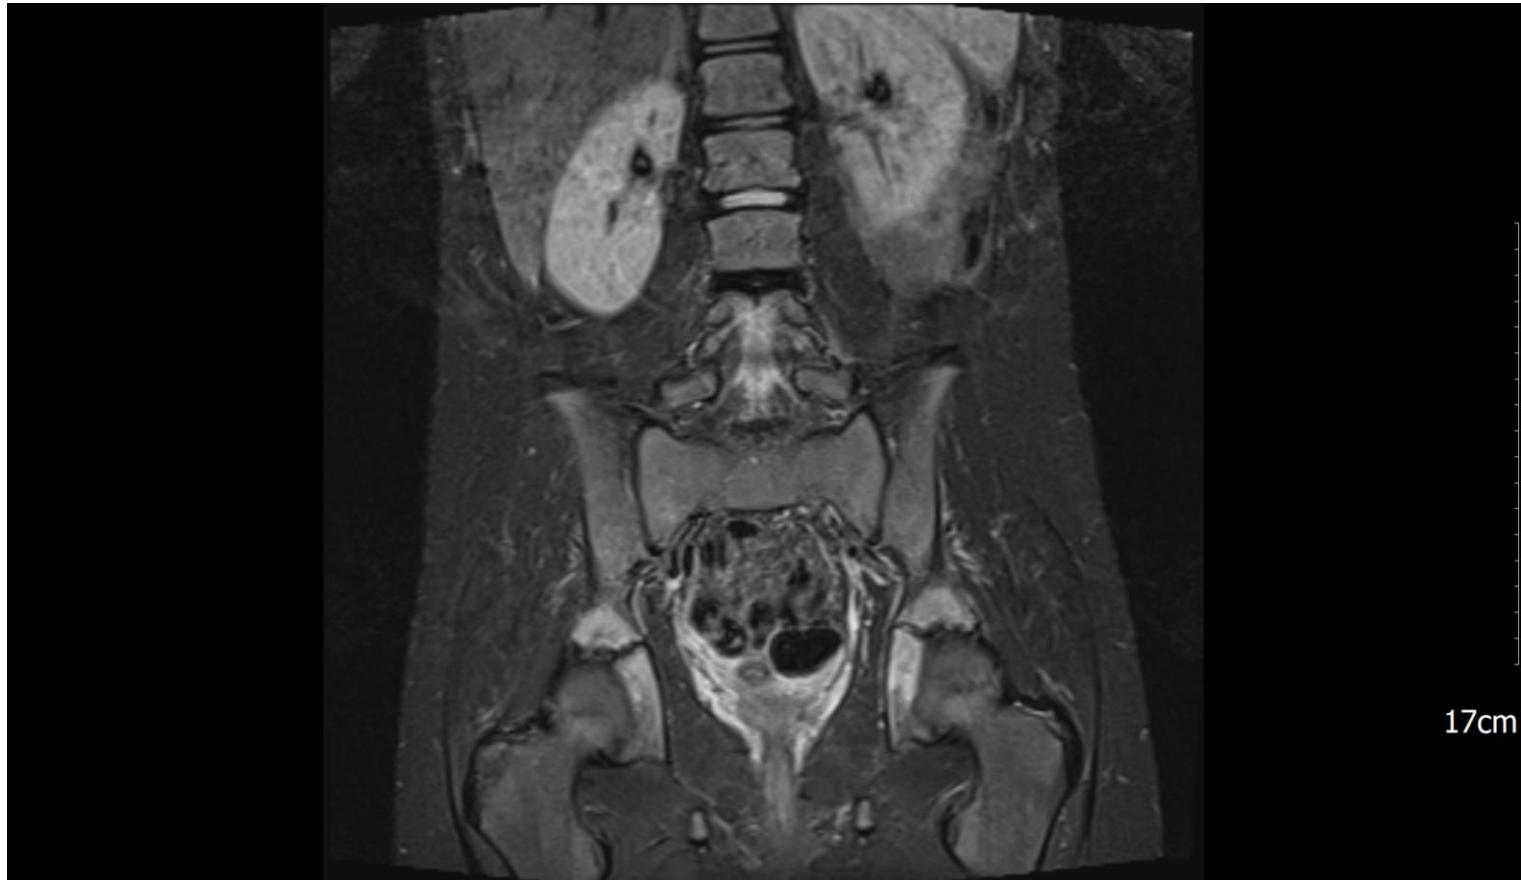

**Signal site:** periacetabular Right, Left

**Bone marrow hyperintensity:** Maximal signal strength: < fluid signal, similar to fluid signal

**Signal size:** absent, <25%, 25-50%, >50%, present (not gradable secondary to artifact), **extends to adjacent contiguous bone?** If so, please write the name of site \_\_\_\_\_ and the size \_\_\_\_\_

**Soft tissue/periosteal hyperintensity:** absent, present

**Bony expansion:** absent, present

# Pubis/Ischium

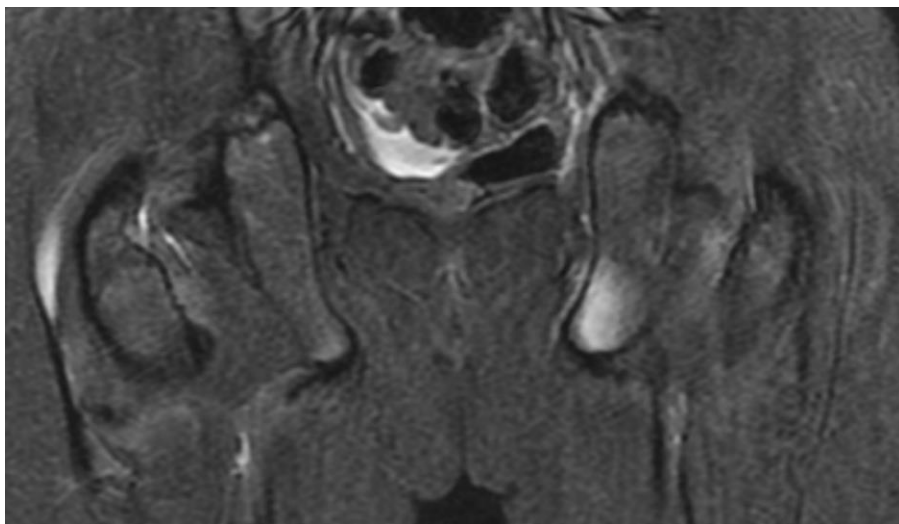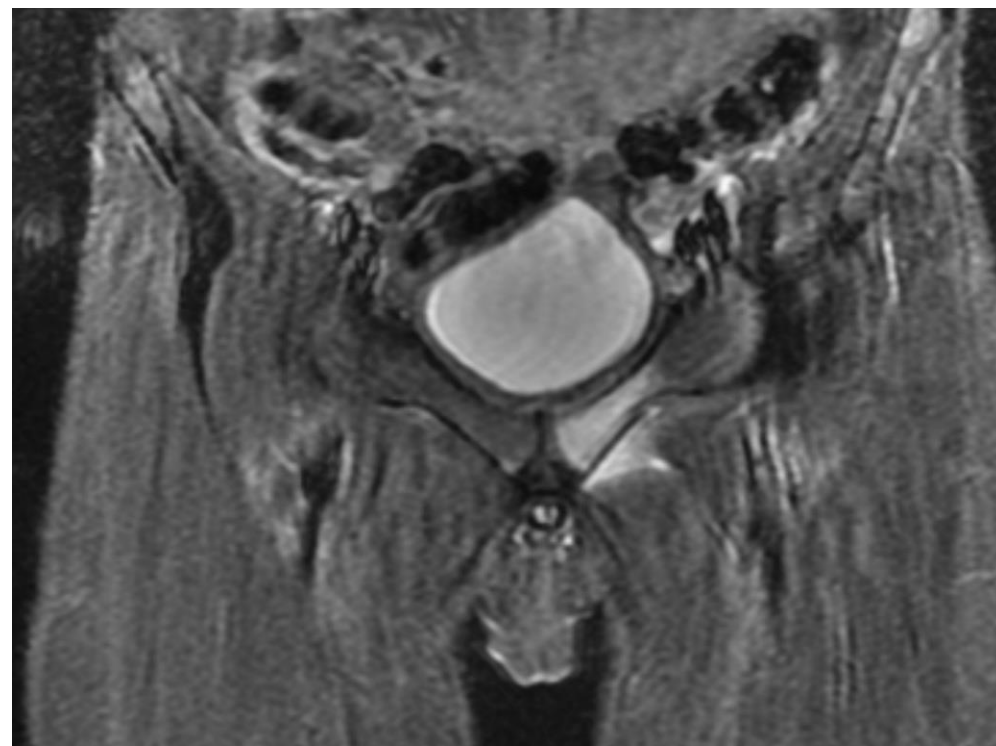

**Signal site:** Pubis/Ischium Left

**Bone marrow hyperintensity:** absent, < fluid signal, similar to fluid signal

**Signal size:** absent, <25%, 25-50%, >50%, present (not gradable secondary to artifact), **extends to adjacent contiguous bone?** If so, please write the **name of site** \_\_\_\_\_ and the **size** \_\_\_\_\_

**Soft tissue or periosteal hyperintensity:** absent, present

**Bony expansion:** absent, present

# Sacrum

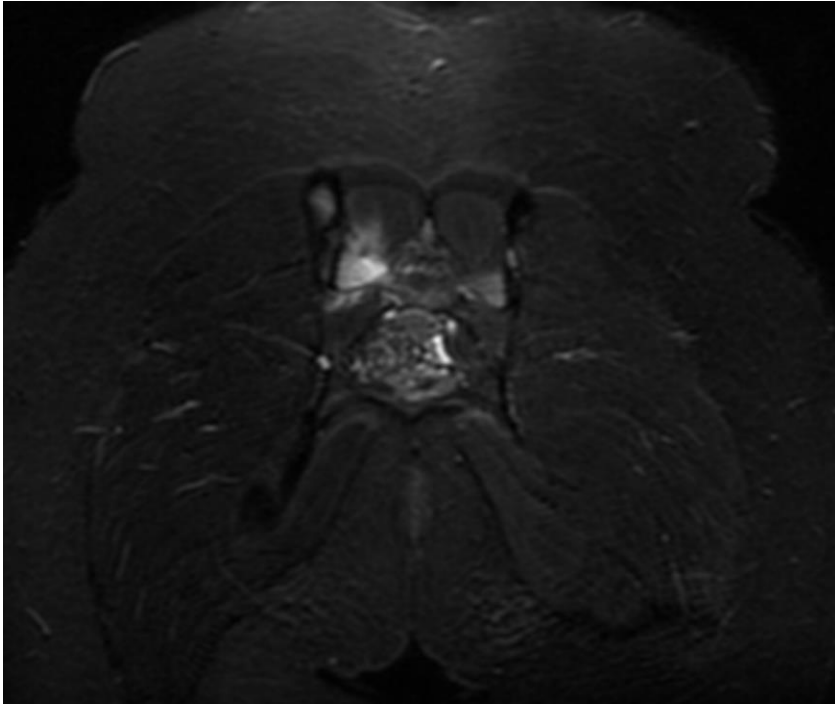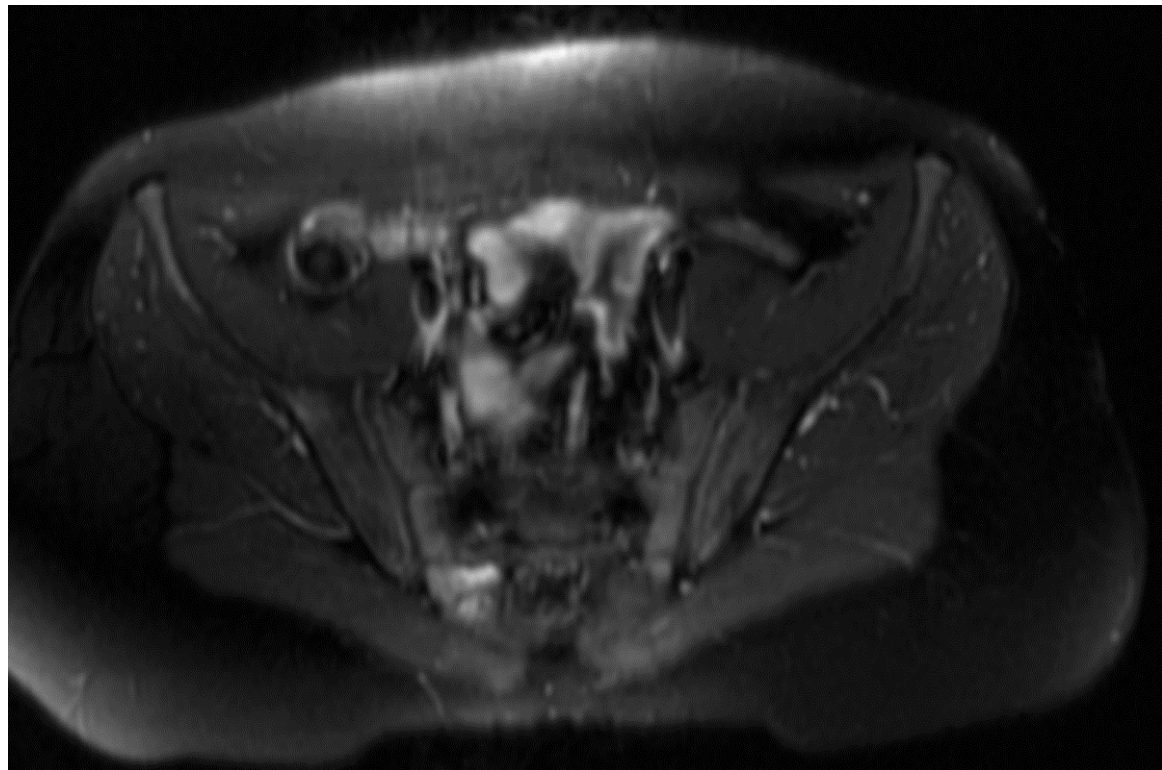

The abnormality in this patient was limited to that seen on these images (i.e. less than 25%), the remainder of this hemisacrum was normal.

**Signal site:** Sacrum Right

**Bone marrow hyperintensity:** absent, < fluid signal, similar to fluid signal

**Signal size:** absent, <25%, 25-50%, >50%, present (not gradable secondary to artifact), extends to adjacent contiguous bone? If so, please write the name of site \_\_\_\_\_ and the size \_\_\_\_\_

**Soft tissue or periosteal hyperintensity:** absent, present

**Bony expansion:** absent, present

# Humerus

**Signal site:** humerus **Right**

**Bone marrow hyperintensity:** absent, < fluid signal, similar to fluid signal

**Signal size of prox epiphysis:** absent, <25%, 25-50%, >50%

**Signal size of prox metaphysis:** absent, <25%, 25-50%, >50%

**Signal size of diaphysis:** absent, <25%, 25-50%, >50%;  
contiguous

**Signal size of dis metaphysis:** absent, <25%, 25-50%, >50%

**Signal size of dis epiphysis:** absent, <25%, 25-50%, >50%

**Soft tissue/periosteal hyperintensity:** absent, present

**Bony expansion:** absent, present

Only mark if confidence is *low* or *medium*,  
sites: \_\_\_\_\_

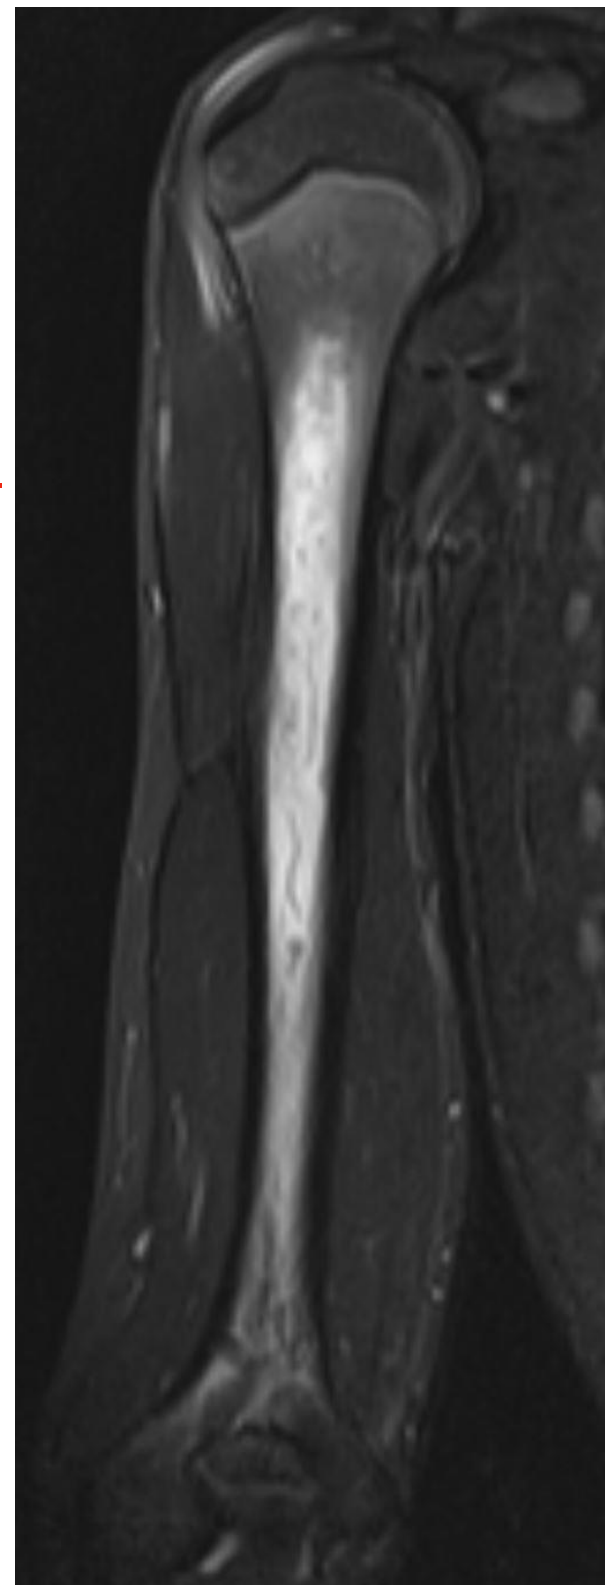

# Radius

**Signal Site:** Radius Right

**Bone marrow hyperintensity:** absent, < fluid signal, similar to fluid signal

**Signal size of prox epiphysis:** absent, <25%, 25-50%, >50%

**Signal size of prox metaphysis:** absent, <25%, 25-50%, >50%

**Signal size of diaphysis:** absent, <25%, 25-50%, >50%;  
contiguous

**Signal size of dis metaphysis:** absent, <25%, 25-50%, >50%

**Signal size of dis epiphysis:** absent, <25%, 25-50%, >50%

**Soft tissue/periosteal hyperintensity:** absent, present

**Bony expansion:** absent, present

Only mark if confidence is *low* or *medium*,  
sites: \_\_\_\_\_

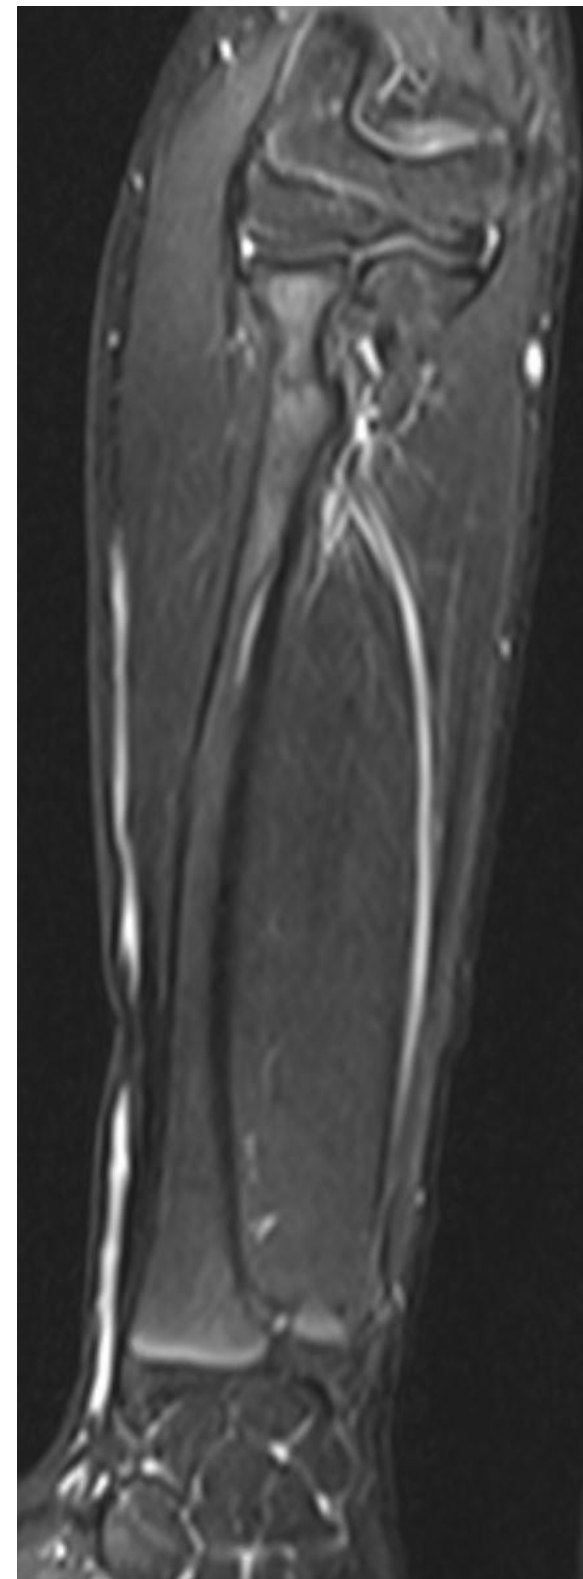

# Ulna

**Signal Site:** Ulna Left

Bone marrow hyperintensity: absent,  
< fluid signal, similar to fluid signal

**Signal size of prox epiphysis:** absent,  
<25%, 25-50%, >50%

**Signal size of prox metaphysis:** absent,  
<25%, 25-50%, >50%

**Signal size of diaphysis:** absent,  
<25%, 25-50%, >50%; contiguous

**Signal size of dist metaphysis:** absent,  
<25%, 25-50%, >50%

**Signal size of dist epiphysis:** absent,  
<25%, 25-50%, >50%

**Soft tissue/periosteal hyperintensity:**  
absent, present

**Bony expansion:** absent, present

Only mark if confidence is *low* or  
*medium*, sites: \_\_\_\_\_

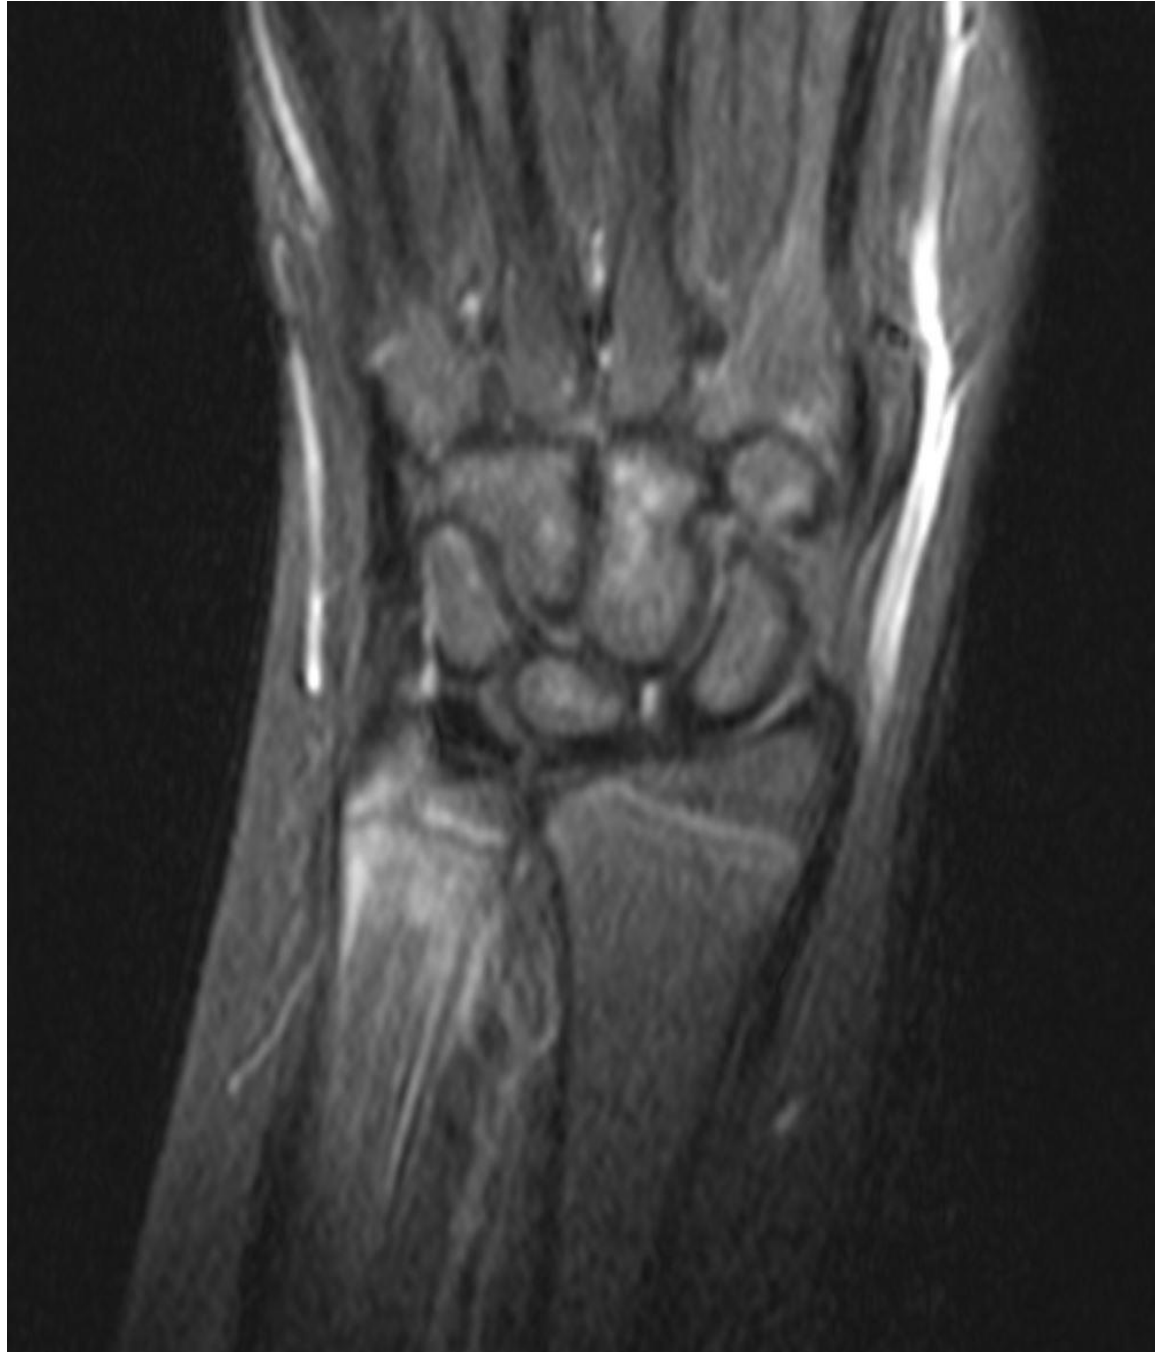

# Femur

**Signal Site:** Femur Left

**Bone marrow hyperintensity:** absent, < fluid signal, similar to fluid signal

**Signal size within proximal epiphysis:** absent, <25%, 25-50%, >50%

**Signal size within proximal metaphysis:** absent, <25%, 25-50%, >50%,

**Signal size within diaphysis:** absent, <25%, 25-50%, >50%;  
contiguous

**Signal size within distal metaphysis:** absent, <25%, 25-50%, >50%

**Signal size within distal epiphysis:** absent, <25%, 25-50%, >50%

**Soft tissue/periosteal hyperintensity:** absent, present

**Bony expansion:** absent, present

Only mark if confidence is *low* or *medium*,  
sites: \_\_\_\_\_

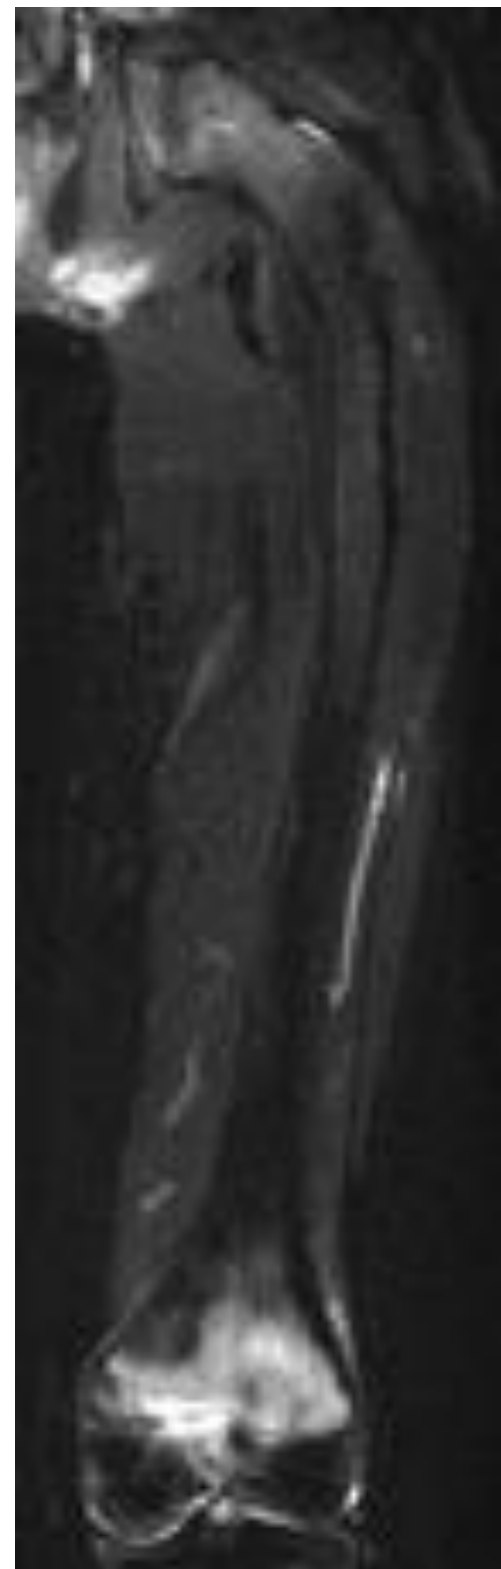

# Patella

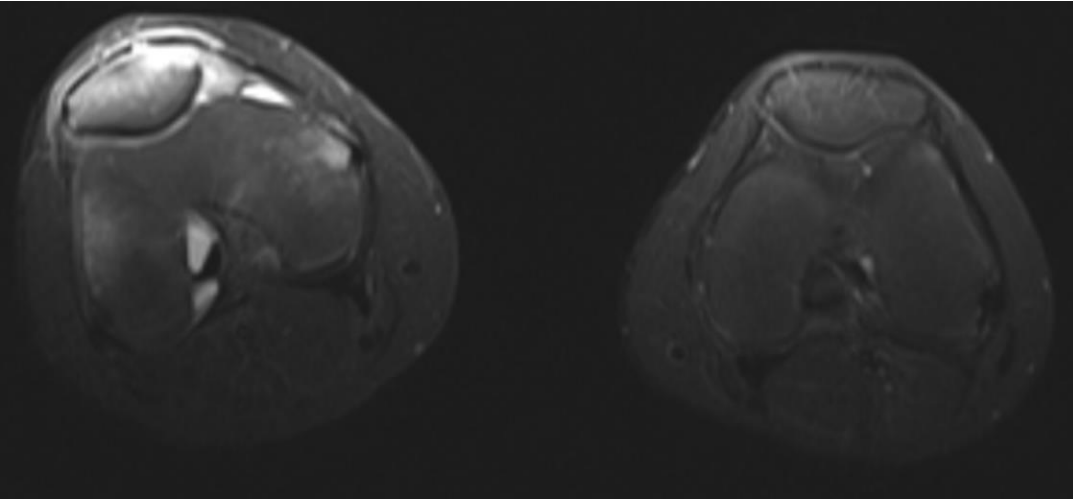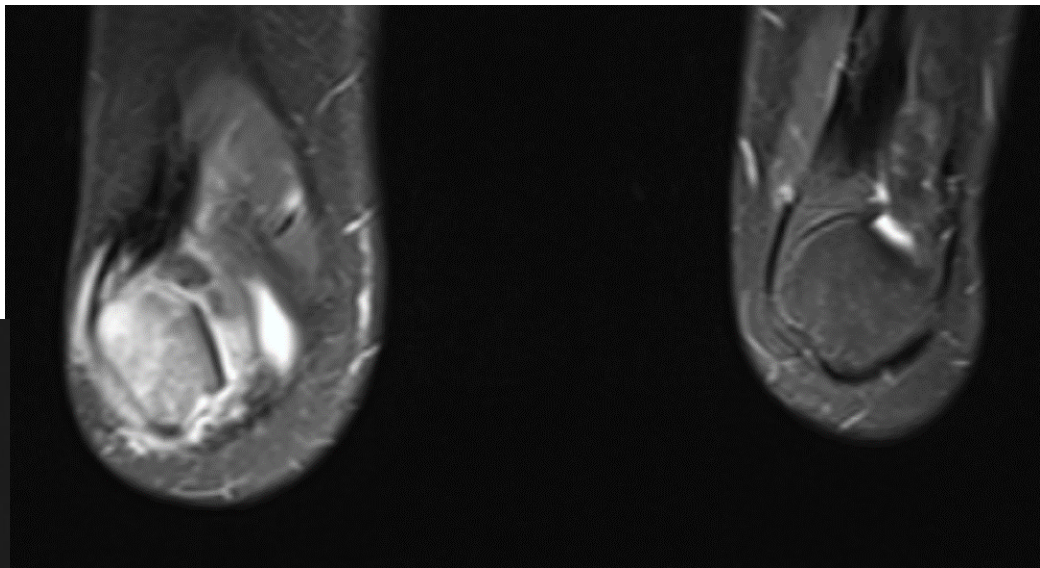

**Signal site:** Patella Right

**Bone marrow hyperintensity: Maximal signal strength:**

< fluid signal, similar to fluid signal

**Signal size:** absent, <25%, 25-50%, >50%, present (not gradable secondary to artifact),

**Soft tissue/periosteal hyperintensity:** absent, present

**Bony expansion:** absent, present

# Tibia

**Signal Site:** Tibia **Left**

**Bone marrow hyperintensity:** absent, < fluid signal, **similar to fluid signal**

**Signal within proximal epiphysis:** absent, <25%, **25-50%**, >50%

**Signal within proximal metaphysis:** **absent**, <25%, 25-50%, >50%,

**Signal within diaphysis:** **absent**, <25%, 25-50%, >50%; contiguous

**Signal within distal metaphysis:** absent, <25%, 25-50%, **>50%**

**Signal within distal epiphysis:** absent, **<25%**, 25-50%, >50%

**Soft tissue/periosteal hyperintensity:** absent, **present**

**Bony expansion:** **absent**, present

Only mark if confidence is *low* or *medium*,

sites: \_\_\_\_\_

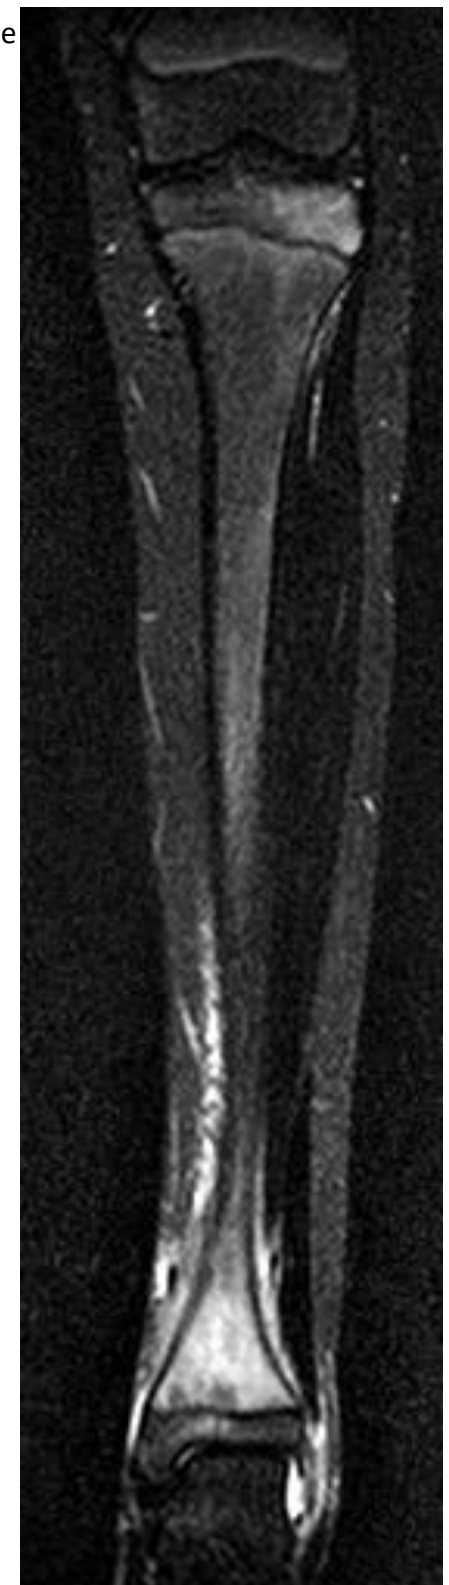

# Tibia

**Signal Site:** Tibia Left

**Bone marrow hyperintensity:** absent, < fluid signal, similar to fluid signal

**Signal size within proximal epiphysis:** absent, <25%, 25-50%, >50%

**Signal size within proximal metaphysis:** absent, <25%, 25-50%, >50%,

**Signal size within diaphysis:** absent, <25%, 25-50%, >50%; contiguous

**Signal size within distal metaphysis:** absent, <25%, 25-50%, >50%

**Signal size within distal epiphysis:** absent, <25%, 25-50%, >50%

**Soft tissue/periosteal hyperintensity:** absent, present,

**Bony expansion:** absent, present

**Only mark if confidence is *low* or *medium*, sites:** \_\_\_\_\_

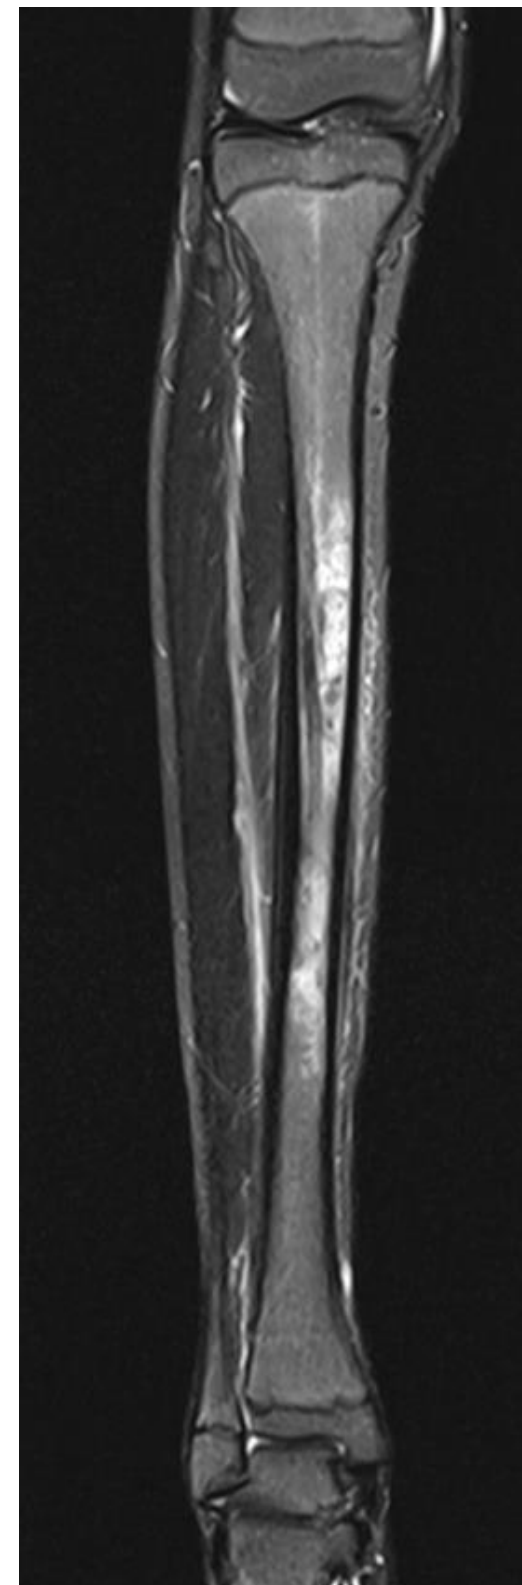

# Hypertrophy of limb

Left femur is longer and wider than the contralateral side secondary to distal disease

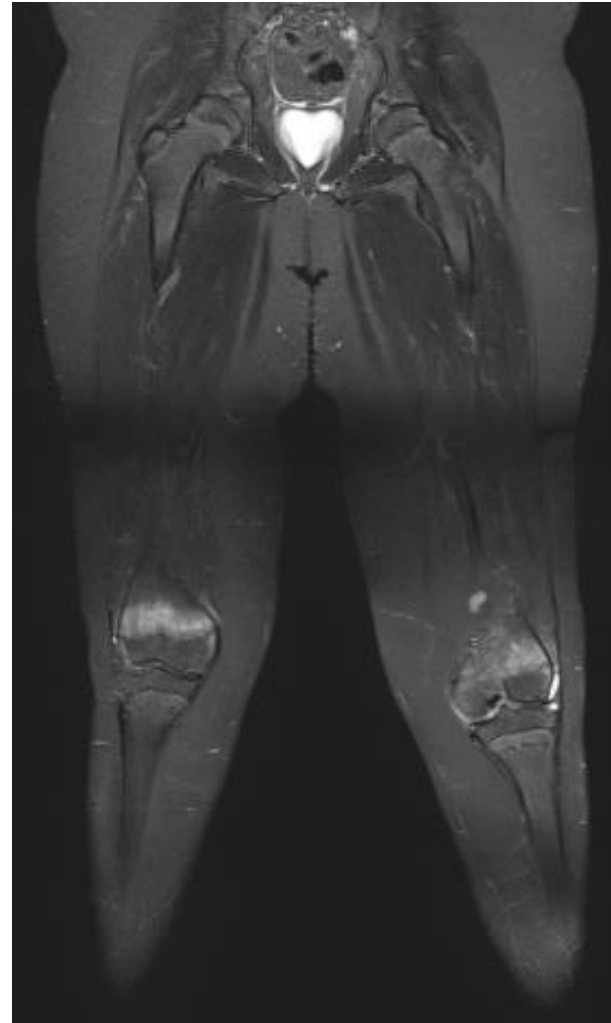

## Normal foot

Patchy, non-confluent high STIR signal involving almost all bones.

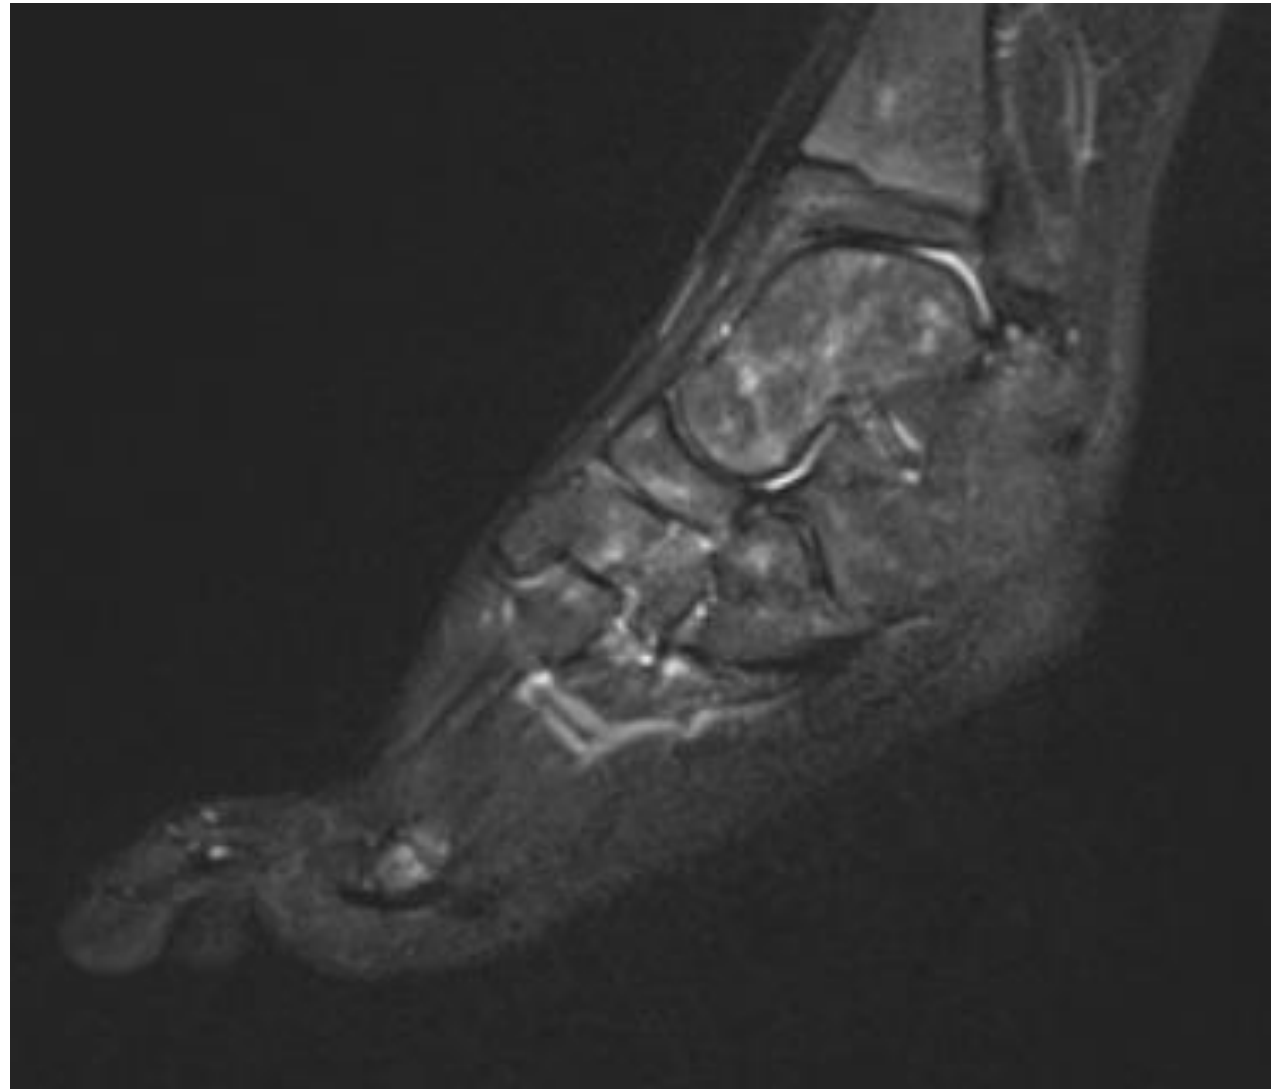

# Abnormal foot

Abnormal foot at the MT bone: treat it as a long bone

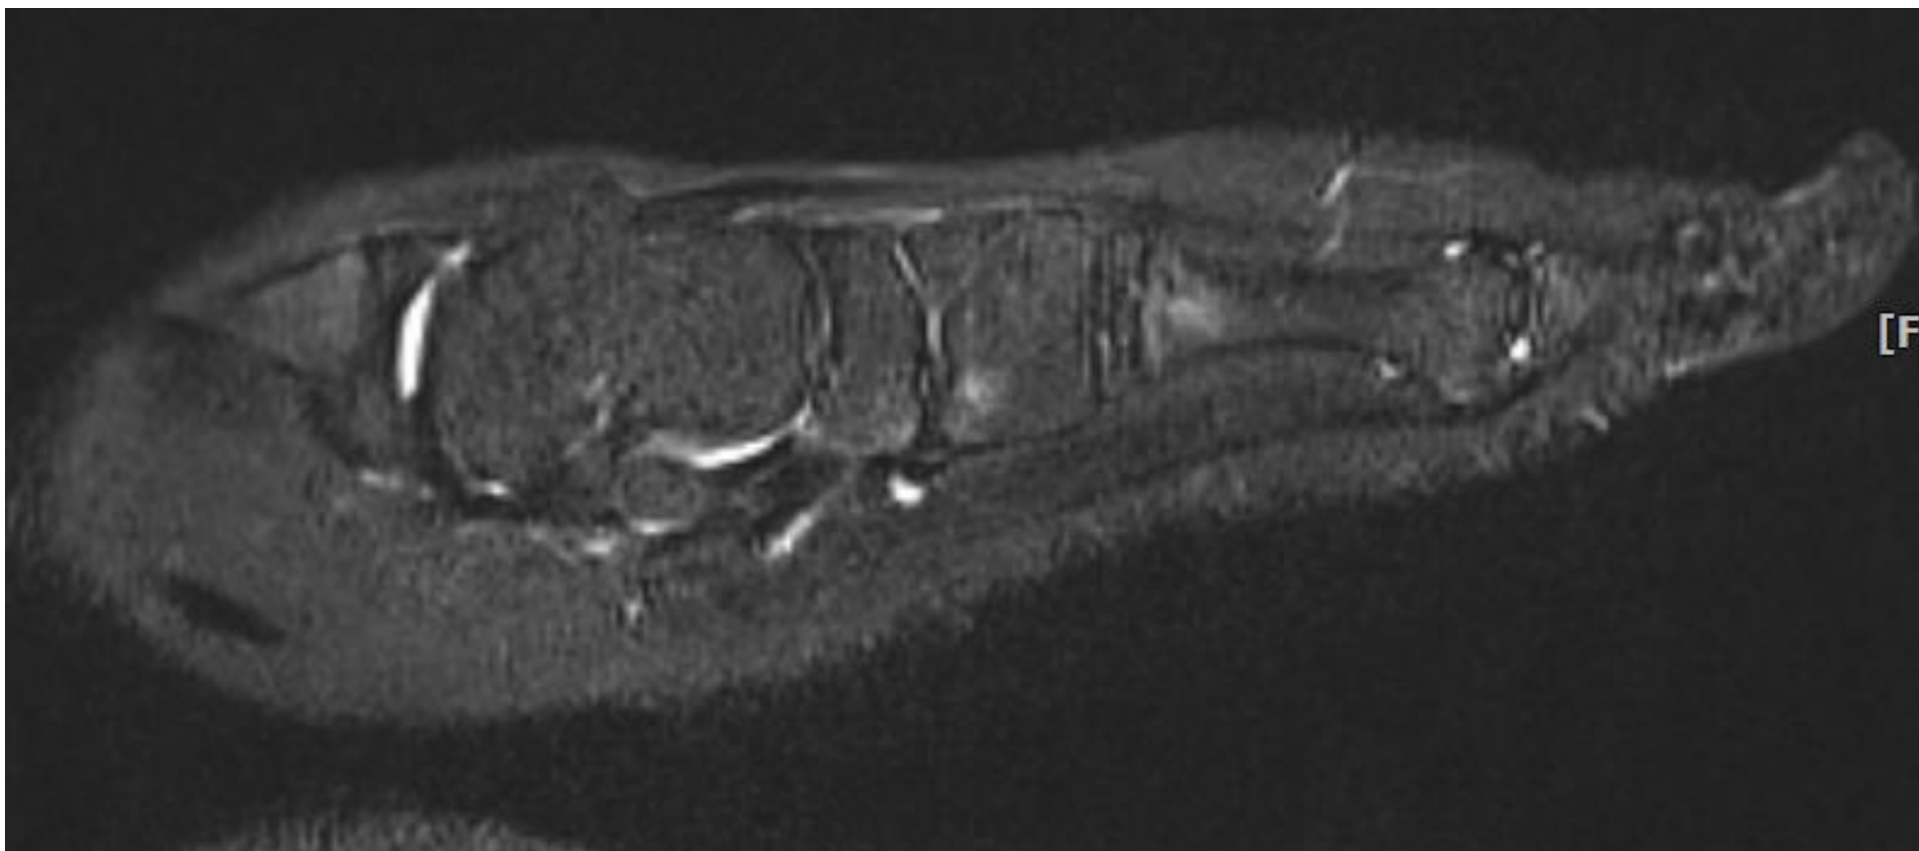

Shabshin et al. Pediatric Radiology 2006, 36: 673 (see Figure 3)

# Foot

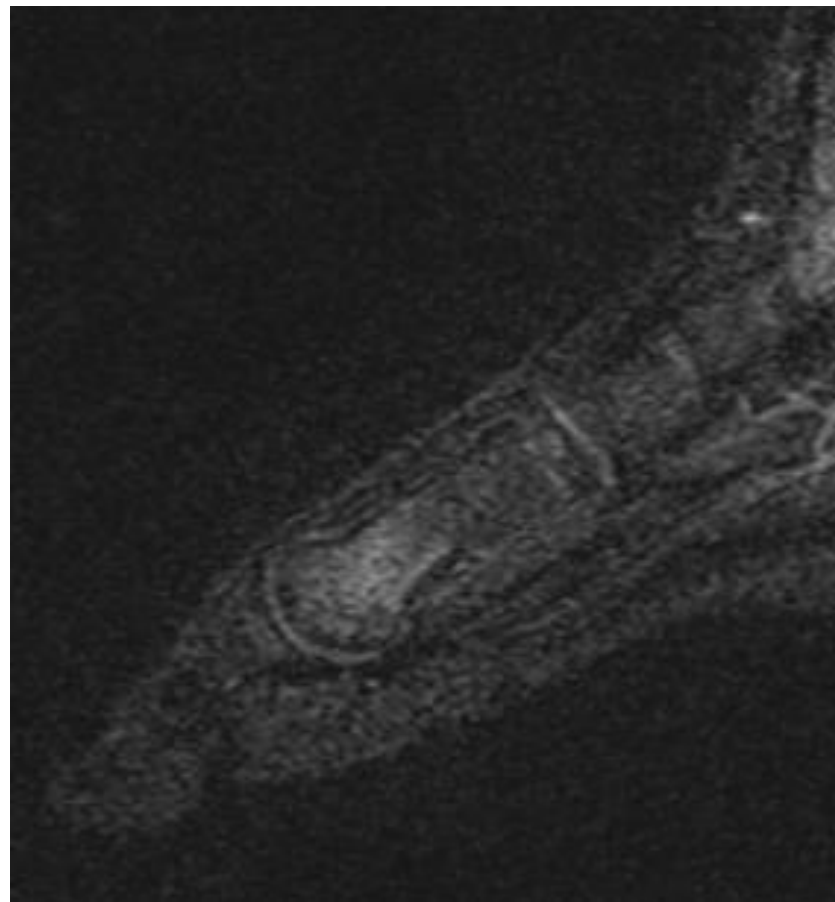

**Signal site:** forefoot/midfoot

Right, Left

**Bone marrow hyperintensity:** absent, < fluid signal, similar to fluid signal

**Signal size:** <25%, 25-50%, >50%, present (not gradable secondary to artifact)

**# of bones with edema:** 1, **specific bones:** 1<sup>st</sup> metatarsal

**Soft tissue/periosteal hyperintensity:** absent, present

**Bony expansion:** absent, present

**Only mark if confidence is *low* or *medium*, sites:** \_\_\_\_\_

# Foot

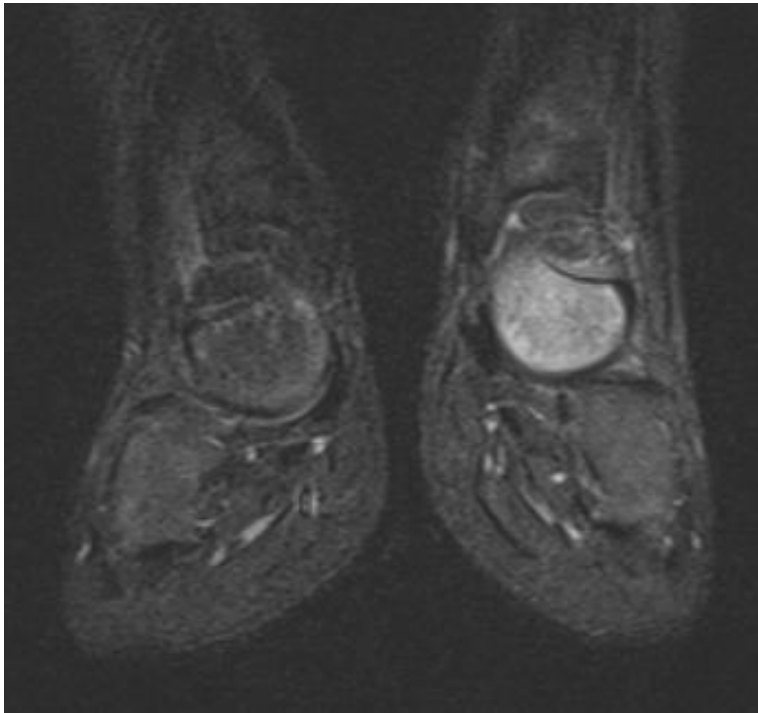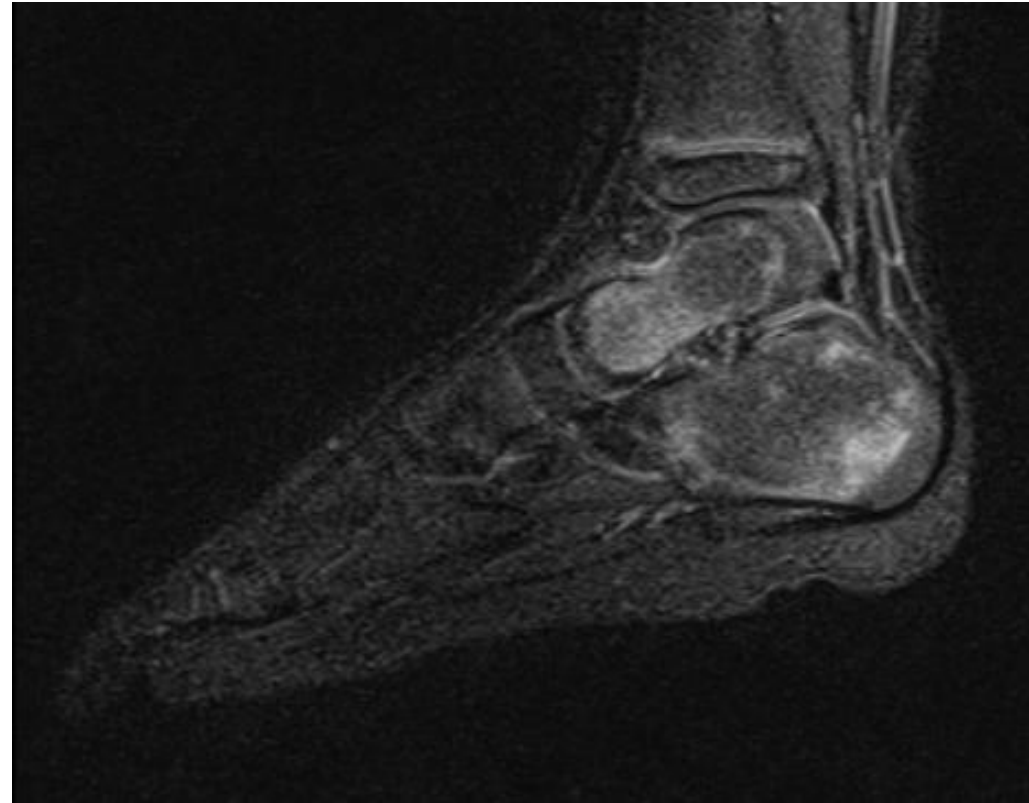

**Signal site:** hindfoot

Right, Left

**Bone marrow hyperintensity:** absent, < fluid signal, similar to fluid signal

**Signal size:** <25%, 25-50%, >50%, present (not gradable secondary to artifact)

**# of bones with edema:** 2, **specific bones:** talus, calcaneus

**Soft tissue/periosteal hyperintensity:** absent, present

**Bony expansion:** absent, present

**Only mark if confidence is *low* or *medium*, sites:** \_\_\_\_\_

Pamidronate (or  
other  
bisphosphonate)  
treatment may cause  
uniform linear  
hyperintensity within  
metaphysis and  
should NOT be  
scored

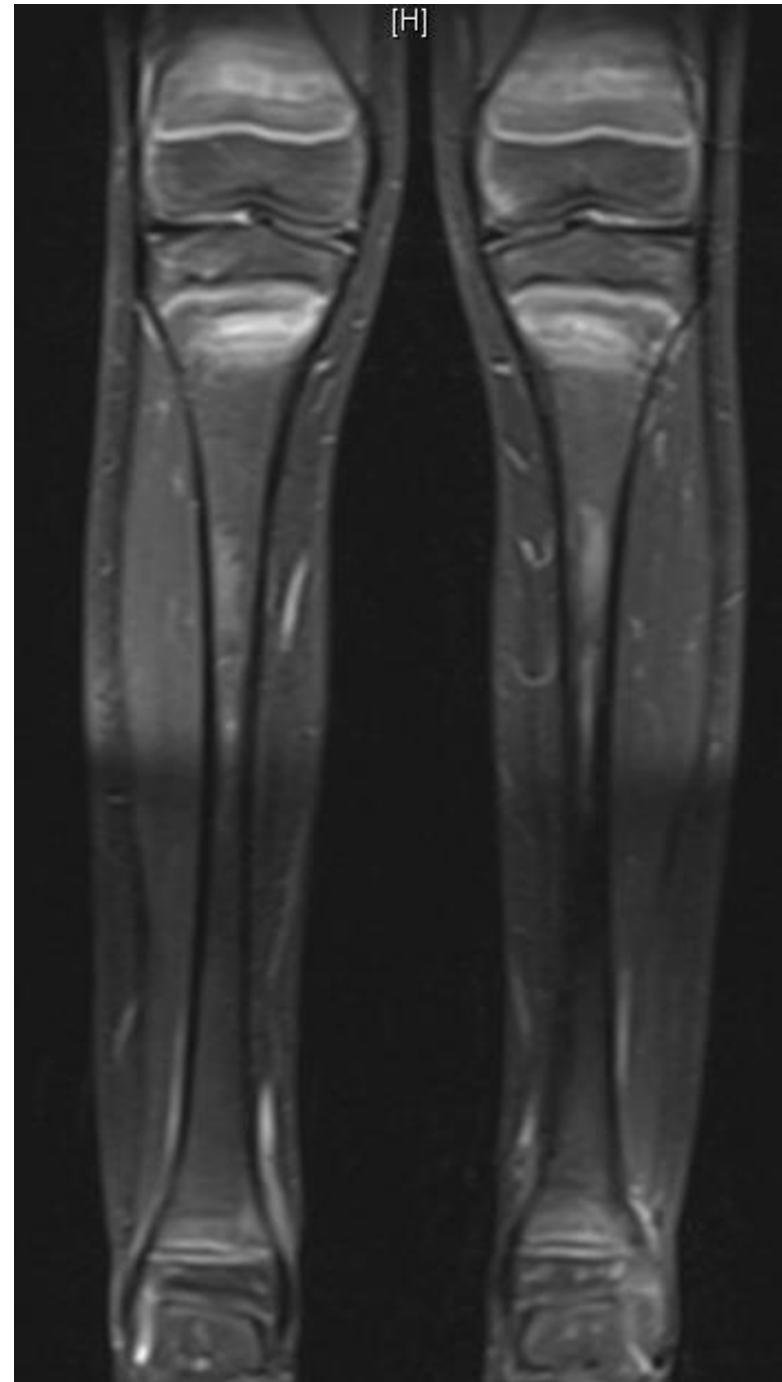

Supplement 3. Reader's characteristics\*

| <b>Variables</b>            | <b>Readers</b> |
|-----------------------------|----------------|
|                             | <b>(n=11)</b>  |
| Country                     |                |
| USA, n (%)                  | 7 (64%)        |
| Canada, n (%)               | 2 (18%)        |
| Germany, n (%)              | 1 (9%)         |
| Italy, n (%)                | 1 (9%)         |
| Years of experience         | 7 (6-10)       |
| Number of MRI read per year | 20 (10-36)     |

\*Data are presented as medians (IQR) unless stated otherwise.

Supplement 4. Prevalence of bone marrow hyperintensity, surrounding tissue hyperintensity and bony expansion in individual bone units among patients

| <b>Site</b>          | <b>Bone marrow hyperintensity</b> | <b>Vertebral compression</b> | <b>Surrounding tissue hyperintensity</b> | <b>Bony expansion</b> |
|----------------------|-----------------------------------|------------------------------|------------------------------------------|-----------------------|
| C1                   | 0%                                | 0%                           | 0%                                       | 0%                    |
| C2                   | 0%                                | 0%                           | 0%                                       | 0%                    |
| C3                   | 0%                                | 0%                           | 0%                                       | 0%                    |
| C4                   | 0%                                | 0%                           | 0%                                       | 0%                    |
| C5                   | 0%                                | 0%                           | 0%                                       | 0%                    |
| C6                   | 0%                                | 0%                           | 0%                                       | 0%                    |
| C7                   | 0%                                | 0%                           | 0%                                       | 0%                    |
| T1                   | 2%                                | 0%                           | 0%                                       | 0%                    |
| T2                   | 0%                                | 2%                           | 0%                                       | 0%                    |
| T3                   | 4%                                | 4%                           | 0%                                       | 0%                    |
| T4                   | 2%                                | 2%                           | 0%                                       | 0%                    |
| T5                   | 4%                                | 4%                           | 0%                                       | 0%                    |
| T6                   | 2%                                | 4%                           | 0%                                       | 0%                    |
| T7                   | 0%                                | 2%                           | 0%                                       | 0%                    |
| T8                   | 2%                                | 0%                           | 0%                                       | 0%                    |
| T9                   | 0%                                | 0%                           | 0%                                       | 0%                    |
| T10                  | 0%                                | 0%                           | 0%                                       | 0%                    |
| T11                  | 0%                                | 0%                           | 0%                                       | 0%                    |
| T12                  | 0%                                | 0%                           | 0%                                       | 0%                    |
| L1                   | 2%                                | 0%                           | 0%                                       | 0%                    |
| L2                   | 0%                                | 0%                           | 0%                                       | 0%                    |
| L3                   | 0%                                | 0%                           | 0%                                       | 0%                    |
| L4                   | 0%                                | 0%                           | 0%                                       | 0%                    |
| L5                   | 0%                                | 0%                           | 0%                                       | 0%                    |
| Ilium left           | 0%                                | -                            | 0%                                       | 0%                    |
| Ilium right          | 4%                                | -                            | 0%                                       | 0%                    |
| Periacetabulum left  | 2%                                | -                            | 2%                                       | 0%                    |
| Periacetabulum right | 7%                                | -                            | 0%                                       | 0%                    |
| Pubis/ischium left   | 0%                                | -                            | 0%                                       | 0%                    |
| Pubis/ischium right  | 2%                                | -                            | 0%                                       | 0%                    |
| Sacrum left          | 7%                                | -                            | 0%                                       | 0%                    |
| Sacrum right         | 2%                                | -                            | 0%                                       | 0%                    |
| Clavicle left        | 4%                                | -                            | 0%                                       | 0%                    |
| Clavicle right       | 9%                                | -                            | 2%                                       | 2%                    |
| Mandible left        | 2%                                | -                            | 2%                                       | 2%                    |
| Mandible right       | 0%                                | -                            | 0%                                       | 0%                    |
| Manubrium/sterna     | 0%                                | -                            | 0%                                       | 0%                    |
| Patella left         | 0%                                | -                            | 0%                                       | 0%                    |
| Patella right        | 2%                                | -                            | 0%                                       | 0%                    |
| Rib A right          | 0%                                | -                            | 0%                                       | 0%                    |
| Rib B right          | 0%                                | -                            | 0%                                       | 0%                    |
| Rib C right          | 0%                                | -                            | 0%                                       | 0%                    |
| Rib D right          | 0%                                | -                            | 0%                                       | 0%                    |
| Rib E right          | 0%                                | -                            | 0%                                       | 0%                    |
| Rib F right          | 0%                                | -                            | 0%                                       | 0%                    |
| Rib G right          | 0%                                | -                            | 0%                                       | 0%                    |
| Rib H right          | 0%                                | -                            | 0%                                       | 0%                    |
| Rib I right          | 0%                                | -                            | 0%                                       | 0%                    |

|                     |     |   |    |    |
|---------------------|-----|---|----|----|
| Rib J right         | 0%  | - | 0% | 0% |
| Rib K right         | 0%  | - | 0% | 0% |
| Rib L right         | 0%  | - | 0% | 0% |
| Rib A left          | 0%  | - | 0% | 0% |
| Rib B left          | 0%  | - | 0% | 0% |
| Rib C left          | 0%  | - | 0% | 0% |
| Rib D left          | 0%  | - | 0% | 0% |
| Rib E left          | 0%  | - | 0% | 0% |
| Rib F left          | 0%  | - | 0% | 0% |
| Rib G left          | 0%  | - | 0% | 0% |
| Rib H left          | 0%  | - | 0% | 0% |
| Rib I left          | 0%  | - | 0% | 0% |
| Rib J left          | 0%  | - | 0% | 0% |
| Rib K left          | 0%  | - | 0% | 0% |
| Rib L left          | 0%  | - | 0% | 0% |
| Scapula left        | 0%  | - | 0% | 0% |
| Scapula right       | 0%  | - | 0% | 0% |
| Skull left          | 0%  | - | 0% | 0% |
| Skull right         | 0%  | - | 0% | 0% |
| Fore/mid foot left  | 23% | - | 3% | 0% |
| Fore/mid foot right | 9%  | - | 0% | 0% |
| Hindfoot left       | 18% | - | 0% | 0% |
| Hindfoot right      | 9%  | - | 0% | 0% |
| Hand left           | 3%  | - | 0% | 0% |
| Hand right          | 3%  | - | 0% | 0% |
| Femur left          | 24% | - | 4% | 2% |
| Femur right         | 38% | - | 7% | 4% |
| Fibula left         | 11% | - | 2% | 0% |
| Fibula right        | 12% | - | 4% | 0% |
| Humerus left        | 6%  | - | 0% | 0% |
| Humerus right       | 9%  | - | 3% | 3% |
| Radius left         | 9%  | - | 0% | 0% |
| Radius right        | 6%  | - | 0% | 0% |
| Tibia left          | 29% | - | 4% | 0% |
| Tibia right         | 51% | - | 9% | 0% |
| Ulna left           | 0%  | - | 0% | 0% |
| Ulna right          | 0%  | - | 0% | 0% |

Supplement 5. Absolute agreement among radiologists in signal strength of bone marrow hyperintensity (A), presence of surrounding tissue hyperintensity (B), presence of bony expansion (C), signal size of bone marrow hyperintensity in long bones (D), signal size of bone marrow hyperintensity in other bones (E) and presence of vertebral compression (F) in individual bone units among patients

A. B.

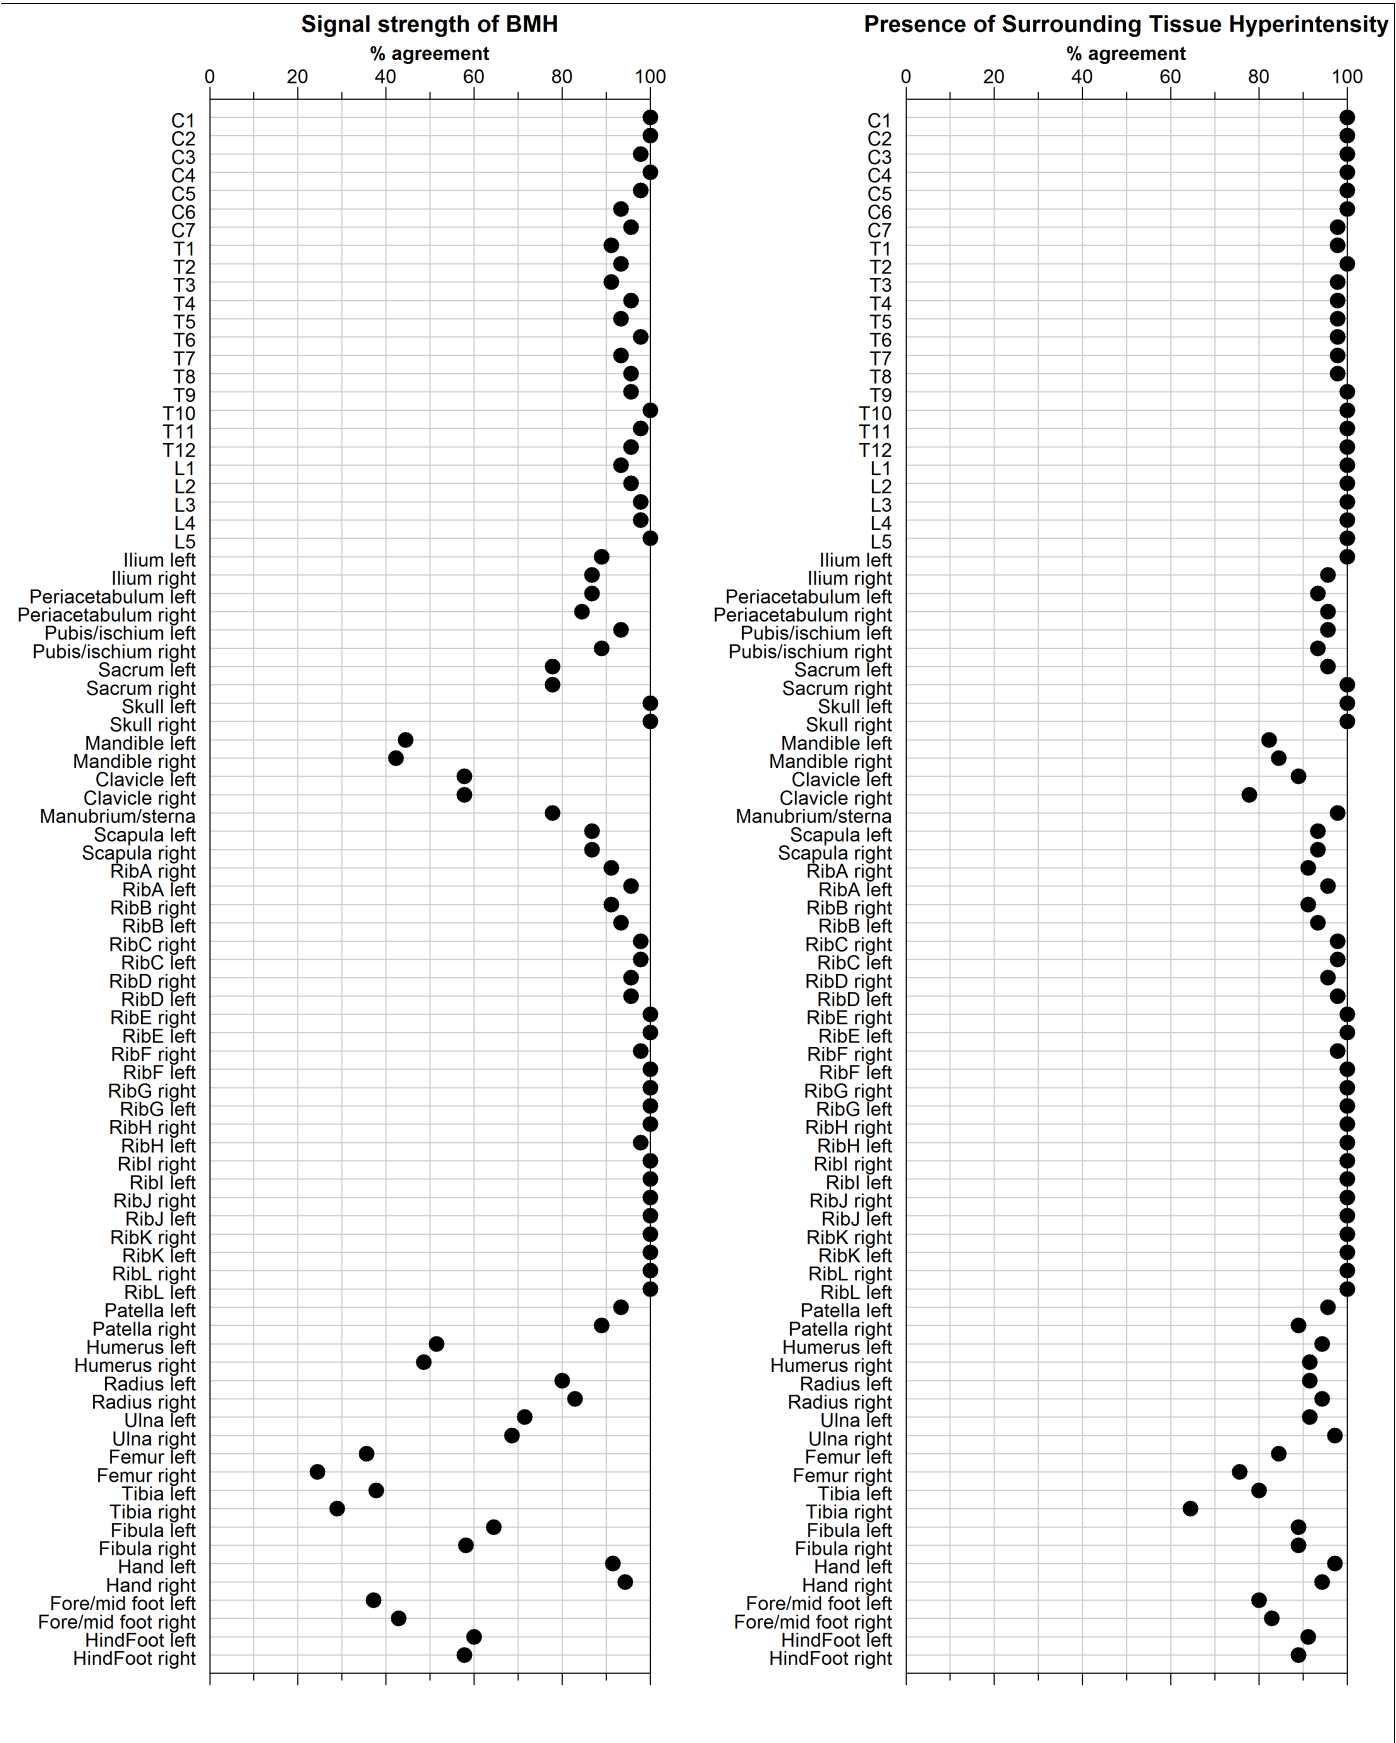

C.

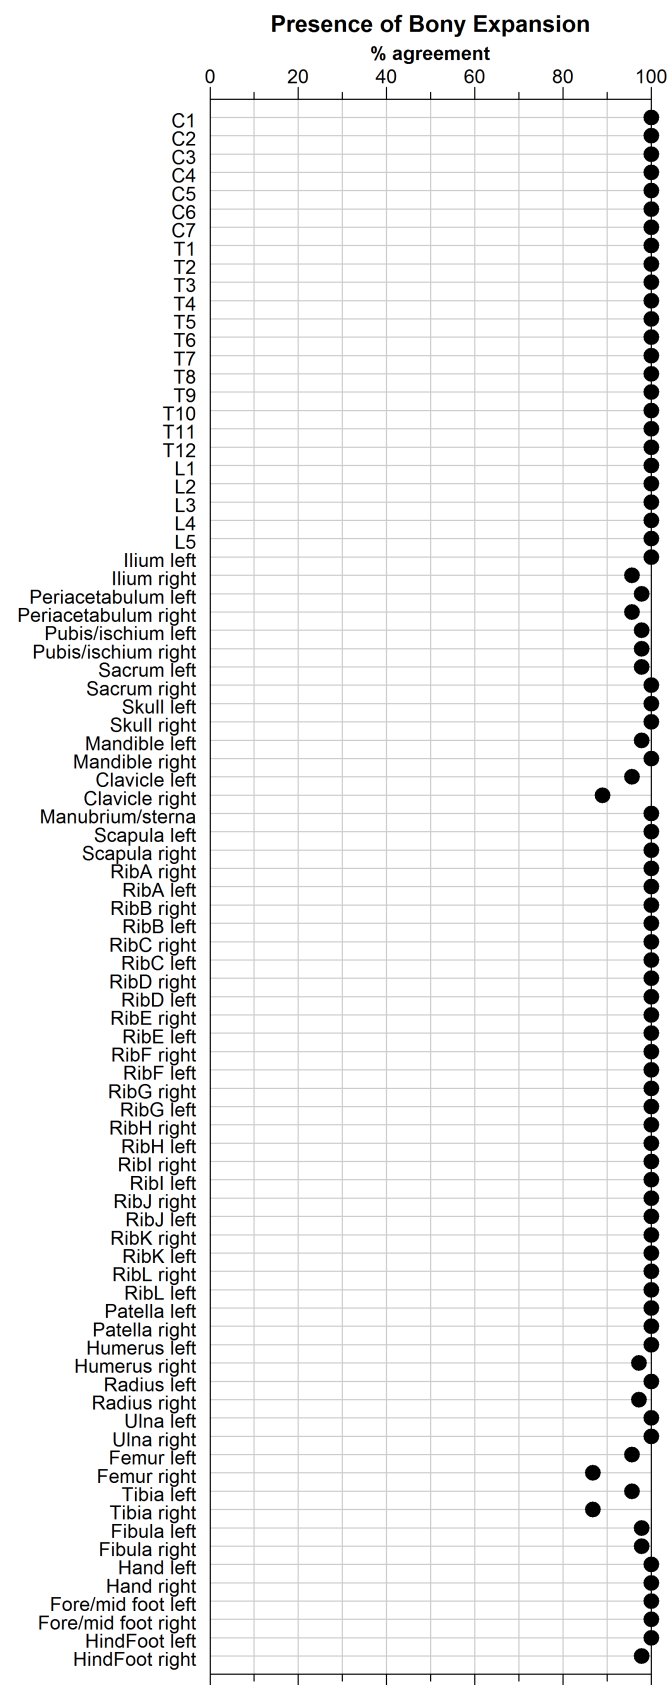

D.

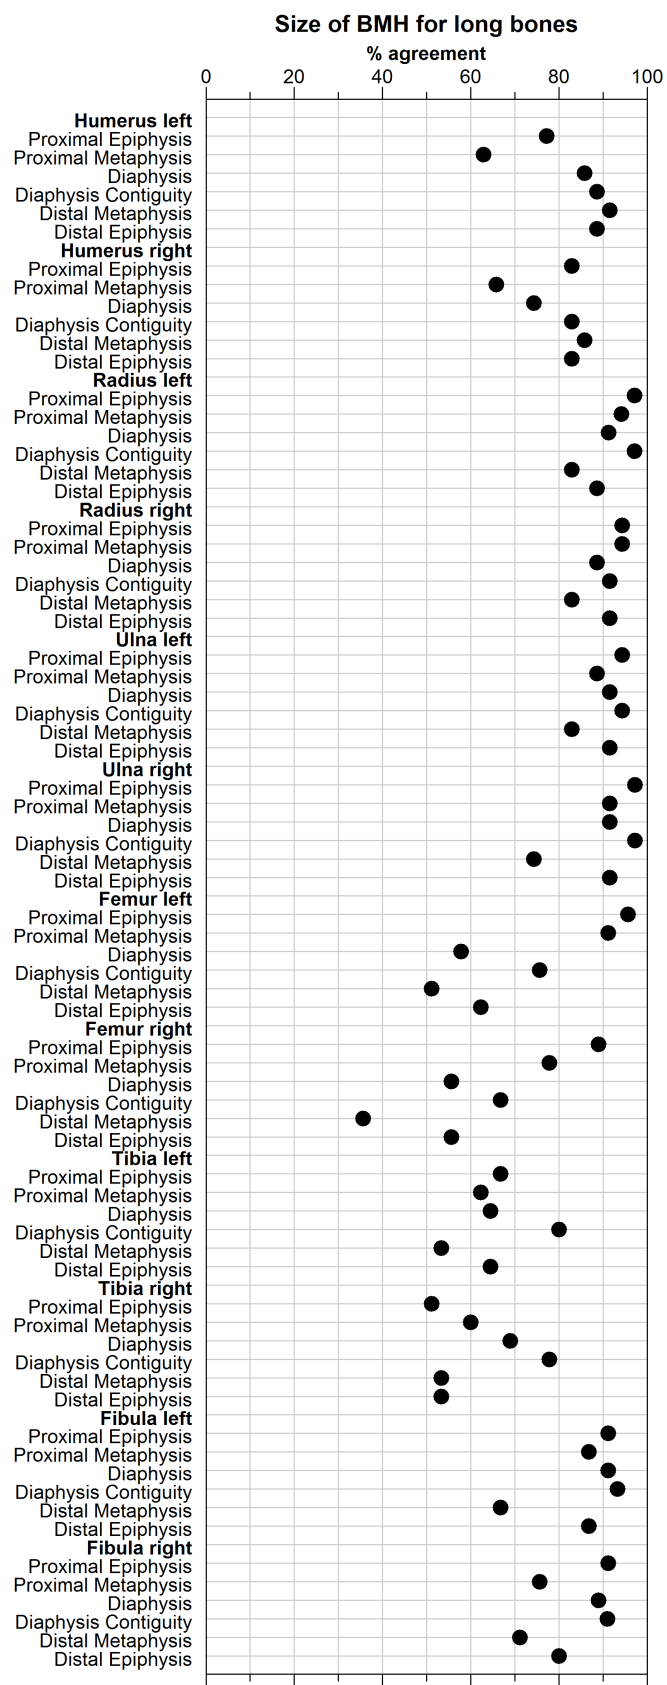

E.

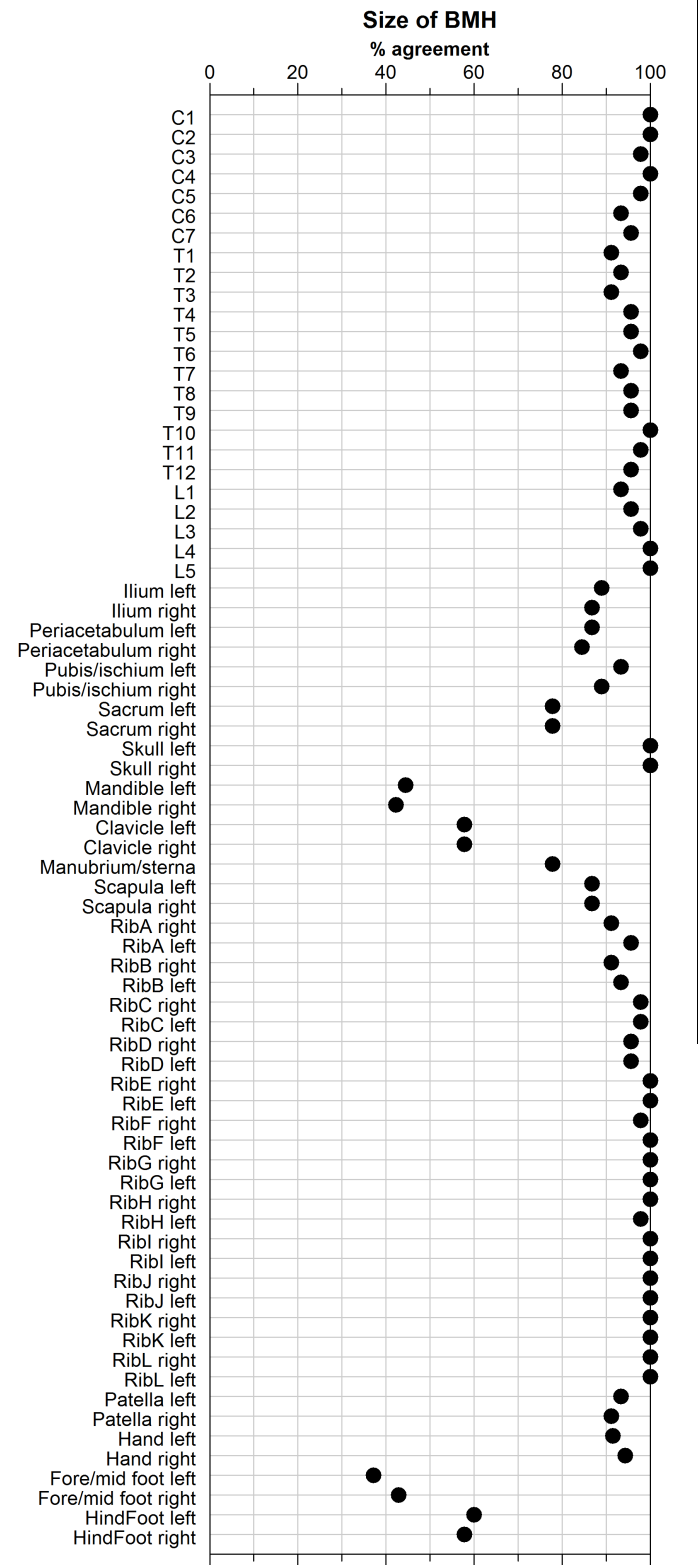

F.

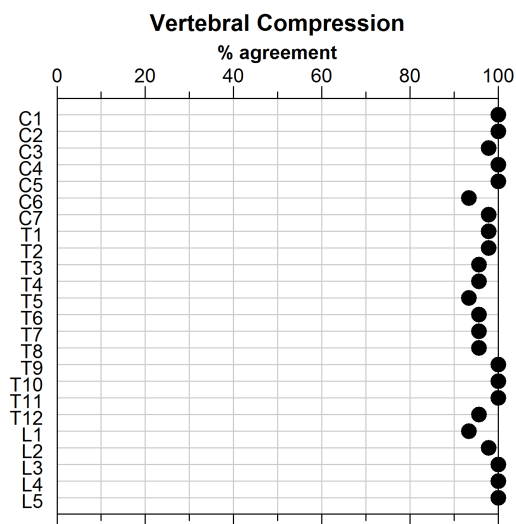

Supplement 6. Kappa results and agreement for individual bone units

A. Signal intensity of bone marrow hyperintensity

| <b>Site</b>          | <b>n<br/>subjects</b> | <b>Kappa (95%CI)</b> | <b>Agreement<br/>(%)</b> |
|----------------------|-----------------------|----------------------|--------------------------|
| <b>Spine</b>         |                       |                      |                          |
| C1                   | 45                    | NA*                  | 100%                     |
| C2                   | 45                    | NA*                  | 100%                     |
| C3                   | 45                    | 0.99 (0.98-1.00)     | 98%                      |
| C4                   | 45                    | NA*                  | 100%                     |
| C5                   | 45                    | 0.99 (0.98-1.00)     | 98%                      |
| C6                   | 45                    | 0.97 (0.94-1.00)     | 93%                      |
| C7                   | 45                    | 0.98 (0.94-1.00)     | 96%                      |
| T1                   | 45                    | 0.98 (0.95-1.00)     | 91%                      |
| T2                   | 45                    | 0.98 (0.96-1.00)     | 93%                      |
| T3                   | 45                    | 0.96 (0.91-1.00)     | 91%                      |
| T4                   | 45                    | 0.98 (0.95-1.00)     | 96%                      |
| T5                   | 45                    | 0.98 (0.95-1.00)     | 93%                      |
| T6                   | 45                    | 0.99 (0.97-1.00)     | 98%                      |
| T7                   | 45                    | 0.97 (0.94-1.00)     | 93%                      |
| T8                   | 45                    | 0.96 (0.90-1.00)     | 96%                      |
| T9                   | 45                    | 0.97 (0.92-1.00)     | 96%                      |
| T10                  | 45                    | NA*                  | 100%                     |
| T11                  | 45                    | 0.99 (0.98-1.00)     | 98%                      |
| T12                  | 45                    | 0.98 (0.96-1.00)     | 96%                      |
| L1                   | 45                    | 0.96 (0.91-1.00)     | 93%                      |
| L2                   | 45                    | 0.98 (0.96-1.00)     | 96%                      |
| L3                   | 45                    | 0.99 (0.98-1.00)     | 98%                      |
| L4                   | 45                    | 0.99 (0.98-1.00)     | 98%                      |
| L5                   | 45                    | NA*                  | 100%                     |
| <b>Complex bone</b>  |                       |                      |                          |
| Ilium left           | 45                    | 0.97 (0.93-1.00)     | 89%                      |
| Ilium right          | 45                    | 0.94 (0.89-0.99)     | 87%                      |
| Periacetabulum left  | 45                    | 0.93 (0.87-1.00)     | 87%                      |
| Periacetabulum right | 45                    | 0.92 (0.85-0.99)     | 84%                      |
| Pubis/ischium left   | 45                    | 0.98 (0.95-1.00)     | 93%                      |
| Pubis/ischium right  | 45                    | 0.93 (0.87-1.00)     | 89%                      |
| Sacrum left          | 45                    | 0.89 (0.82-0.96)     | 78%                      |
| Sacrum right         | 45                    | 0.90 (0.83-0.97)     | 78%                      |
| <b>Flat bone</b>     |                       |                      |                          |
| Clavicle left        | 45                    | 0.85 (0.77-0.92)     | 58%                      |
| Clavicle right       | 45                    | 0.83 (0.74-0.92)     | 58%                      |
| Mandible left        | 45                    | 0.74 (0.66-0.82)     | 44%                      |
| Mandible right       | 45                    | 0.72 (0.64-0.81)     | 42%                      |
| Manubrium/sterna     | 45                    | 0.93 (0.88-0.98)     | 78%                      |
| Patella left         | 45                    | 0.97 (0.94-1.00)     | 93%                      |
| Patella right        | 45                    | 0.92 (0.85-0.99)     | 89%                      |
| Rib A left           | 45                    | 0.98 (0.96-1.00)     | 96%                      |
| Rib A right          | 45                    | 0.96 (0.92-1.00)     | 91%                      |

|                     |    |                  |      |
|---------------------|----|------------------|------|
| Rib B left          | 45 | 0.98 (0.95-1.00) | 93%  |
| Rib B right         | 45 | 0.96 (0.92-1.00) | 91%  |
| Rib C left          | 45 | 0.99 (0.98-1.00) | 98%  |
| Rib C right         | 45 | 0.99 (0.98-1.00) | 98%  |
| Rib D left          | 45 | 0.98 (0.96-1.00) | 96%  |
| Rib D right         | 45 | 0.97 (0.94-1.00) | 96%  |
| Rib E left          | 45 | NA*              | 100% |
| Rib E right         | 45 | NA*              | 100% |
| Rib F left          | 45 | NA*              | 100% |
| Rib F right         | 45 | 0.99 (0.98-1.00) | 98%  |
| Rib G left          | 45 | NA*              | 100% |
| Rib G right         | 45 | NA*              | 100% |
| Rib H left          | 45 | 0.99 (0.98-1.00) | 98%  |
| Rib H right         | 45 | NA*              | 100% |
| Rib I left          | 45 | NA*              | 100% |
| Rib I right         | 45 | NA*              | 100% |
| Rib J left          | 45 | NA*              | 100% |
| Rib J right         | 45 | NA*              | 100% |
| Rib K left          | 45 | NA*              | 100% |
| Rib K right         | 45 | NA*              | 100% |
| Rib L left          | 45 | NA*              | 100% |
| Rib L right         | 45 | NA*              | 100% |
| Scapula left        | 45 | 0.92 (0.86-0.99) | 87%  |
| Scapula right       | 45 | 0.91 (0.83-0.98) | 87%  |
| Skull left          | 45 | NA*              | 100% |
| Skull right         | 45 | NA*              | 100% |
| <b>Hand/foot</b>    |    |                  |      |
| Fore/mid foot left  | 35 | 0.63 (0.51-0.75) | 37%  |
| Fore/mid foot right | 35 | 0.68 (0.55-0.80) | 43%  |
| Hindfoot left       | 45 | 0.84 (0.77-0.92) | 60%  |
| Hindfoot right      | 45 | 0.76 (0.66-0.87) | 58%  |
| Hand left           | 35 | 0.94 (0.88-1.00) | 91%  |
| Hand right          | 35 | 0.94 (0.86-1.00) | 94%  |
| <b>Long bone</b>    |    |                  |      |
| Femur left          | 45 | 0.69 (0.59-0.80) | 36%  |
| Femur right         | 45 | 0.65 (0.54-0.76) | 24%  |
| Fibula left         | 45 | 0.75 (0.62-0.88) | 64%  |
| Fibula right        | 43 | 0.76 (0.63-0.88) | 58%  |
| Humerus left        | 35 | 0.79 (0.68-0.90) | 51%  |
| Humerus right       | 35 | 0.73 (0.58-0.88) | 49%  |
| Radius left         | 35 | 0.90 (0.80-0.99) | 80%  |
| Radius right        | 35 | 0.89 (0.78-1.00) | 83%  |
| Tibia left          | 45 | 0.63 (0.51-0.75) | 38%  |
| Tibia right         | 45 | 0.60 (0.49-0.71) | 29%  |
| Ulna left           | 35 | 0.81 (0.69-0.93) | 71%  |
| Ulna right          | 35 | 0.84 (0.73-0.95) | 69%  |

95%CI, 95% confidence interval.

\* Kappa could not be calculated due to full agreement.

## B-I. Signal size of bone marrow hyperintensity in non-long bones

| Site                 | n subjects | Kappa (95%CI)    | Agreement (%) |
|----------------------|------------|------------------|---------------|
| <b>Spine</b>         |            |                  |               |
| C1                   | 45         | NA*              | 100%          |
| C2                   | 45         | NA*              | 100%          |
| C3                   | 45         | 0.99 (0.98-1.00) | 98%           |
| C4                   | 45         | NA*              | 100%          |
| C5                   | 45         | 0.99 (0.98-1.00) | 98%           |
| C6                   | 45         | 0.98 (0.96-1.00) | 93%           |
| C7                   | 45         | 0.98 (0.96-1.00) | 96%           |
| T1                   | 45         | 0.97 (0.95-1.00) | 91%           |
| T2                   | 45         | 0.98 (0.96-1.00) | 93%           |
| T3                   | 45         | 0.96 (0.92-1.00) | 91%           |
| T4                   | 45         | 0.99 (0.99-1.00) | 96%           |
| T5                   | 45         | 0.97 (0.93-1.00) | 96%           |
| T6                   | 45         | 0.99 (0.97-1.00) | 98%           |
| T7                   | 45         | 0.97 (0.91-1.00) | 93%           |
| T8                   | 45         | 0.97 (0.92-1.00) | 96%           |
| T9                   | 45         | 0.97 (0.92-1.00) | 96%           |
| T10                  | 45         | NA*              | 100%          |
| T11                  | 45         | 0.99 (0.98-1.00) | 98%           |
| T12                  | 45         | 0.98 (0.96-1.00) | 96%           |
| L1                   | 45         | 0.97 (0.94-1.00) | 93%           |
| L2                   | 45         | 0.98 (0.96-1.00) | 96%           |
| L3                   | 45         | 0.99 (0.98-1.00) | 98%           |
| L4                   | 45         | NA*              | 100%          |
| L5                   | 45         | NA*              | 100%          |
| <b>Complex bone</b>  |            |                  |               |
| Ilium left           | 45         | 0.95 (0.89-1.00) | 89%           |
| Ilium right          | 45         | 0.96 (0.91-1.00) | 87%           |
| Periacetabulum left  | 45         | 0.95 (0.90-1.00) | 87%           |
| Periacetabulum right | 45         | 0.92 (0.85-0.98) | 84%           |
| Pubis/ischium left   | 45         | 0.96 (0.89-1.00) | 93%           |
| Pubis/ischium right  | 45         | 0.94 (0.88-1.00) | 89%           |
| Sacrum left          | 45         | 0.95 (0.92-0.99) | 78%           |
| Sacrum right         | 45         | 0.91 (0.85-0.98) | 78%           |
| <b>Flat bone</b>     |            |                  |               |
| Clavicle left        | 45         | 0.91 (0.86-0.96) | 58%           |
| Clavicle right       | 45         | 0.90 (0.84-0.95) | 58%           |
| Mandible left        | 45         | 0.88 (0.83-0.93) | 44%           |
| Mandible right       | 45         | 0.87 (0.82-0.93) | 42%           |
| Manubrium/sterna     | 45         | 0.93 (0.88-0.99) | 78%           |
| Patella left         | 45         | 0.95 (0.90-1.00) | 93%           |
| Patella right        | 45         | 0.91 (0.80-1.00) | 91%           |
| Rib A left           | 45         | 0.98 (0.96-1.00) | 96%           |
| Rib A right          | 45         | 0.96 (0.92-1.00) | 91%           |
| Rib B left           | 45         | 0.98 (0.95-1.00) | 93%           |
| Rib B right          | 45         | 0.96 (0.92-1.00) | 91%           |

|                     |    |                  |      |
|---------------------|----|------------------|------|
| Rib C left          | 45 | 0.99 (0.98-1.00) | 98%  |
| Rib C right         | 45 | 0.99 (0.98-1.00) | 98%  |
| Rib D left          | 45 | 0.98 (0.96-1.00) | 96%  |
| Rib D right         | 45 | 0.98 (0.96-1.00) | 96%  |
| Rib E left          | 45 | NA*              | 100% |
| Rib E right         | 45 | NA*              | 100% |
| Rib F left          | 45 | NA*              | 100% |
| Rib F right         | 45 | 0.99 (0.98-1.00) | 98%  |
| Rib G left          | 45 | NA*              | 100% |
| Rib G right         | 45 | NA*              | 100% |
| Rib H left          | 45 | 0.99 (0.98-1.00) | 98%  |
| Rib H right         | 45 | NA*              | 100% |
| Rib I left          | 45 | NA*              | 100% |
| Rib I right         | 45 | NA*              | 100% |
| Rib J left          | 45 | NA*              | 100% |
| Rib J right         | 45 | NA*              | 100% |
| Rib K left          | 45 | NA*              | 100% |
| Rib K right         | 45 | NA*              | 100% |
| Rib L left          | 45 | NA*              | 100% |
| Rib L right         | 45 | NA*              | 100% |
| Scapula left        | 45 | 0.94 (0.89-0.99) | 87%  |
| Scapula right       | 45 | 0.95 (0.90-0.99) | 87%  |
| Skull left          | 45 | NA*              | 100% |
| Skull right         | 45 | NA*              | 100% |
| <b>Hand/foot</b>    |    |                  |      |
| Fore/mid foot left  | 35 | 0.67 (0.52-0.81) | 37%  |
| Fore/mid foot right | 35 | 0.77 (0.67-0.86) | 43%  |
| Hindfoot left       | 45 | 0.84 (0.76-0.93) | 60%  |
| Hindfoot right      | 45 | 0.80 (0.70-0.91) | 58%  |
| Hand left           | 35 | 0.95 (0.87-1.00) | 91%  |
| Hand right          | 35 | 0.97 (0.92-1.00) | 94%  |

95%CI, 95% confidence interval.

\* Kappa could not be calculated due to full agreement.

## B-II. Signal size of bone marrow hyperintensity in long bones

| Site                        | n subjects | Kappa (95%CI)    | Agreement (%) |
|-----------------------------|------------|------------------|---------------|
| <b>Proximal Epiphysis</b>   |            |                  |               |
| Femur left                  | 45         | 0.97 (0.92-1.00) | 96%           |
| Femur right                 | 45         | 0.95 (0.88-1.00) | 89%           |
| Fibula left                 | 45         | 0.96 (0.93-1.00) | 91%           |
| Fibula right                | 45         | 0.94 (0.88-1.00) | 91%           |
| Humerus left                | 35         | 0.92 (0.86-0.99) | 77%           |
| Humerus right               | 35         | 0.94 (0.88-1.00) | 83%           |
| Radius left                 | 34         | 0.99 (0.97-1.00) | 97%           |
| Radius right                | 35         | 0.96 (0.89-1.00) | 94%           |
| Tibia left                  | 45         | 0.90 (0.84-0.95) | 67%           |
| Tibia right                 | 45         | 0.87 (0.80-0.94) | 51%           |
| Ulna left                   | 35         | 0.97 (0.91-1.00) | 94%           |
| Ulna right                  | 35         | 0.99 (0.97-1.00) | 97%           |
| <b>Proximal Metaphysis</b>  |            |                  |               |
| Femur left                  | 45         | 0.96 (0.92-1.00) | 91%           |
| Femur right                 | 45         | 0.93 (0.86-0.99) | 78%           |
| Fibula left                 | 45         | 0.83 (0.69-0.98) | 87%           |
| Fibula right                | 45         | 0.82 (0.69-0.95) | 76%           |
| Humerus left                | 35         | 0.86 (0.77-0.95) | 63%           |
| Humerus right               | 35         | 0.85 (0.75-0.95) | 66%           |
| Radius left                 | 34         | 0.96 (0.88-1.00) | 94%           |
| Radius right                | 35         | 0.96 (0.90-1.00) | 94%           |
| Tibia left                  | 45         | 0.80 (0.69-0.91) | 62%           |
| Tibia right                 | 45         | 0.78 (0.67-0.90) | 60%           |
| Ulna left                   | 35         | 0.95 (0.88-1.00) | 89%           |
| Ulna right                  | 35         | 0.93 (0.83-1.00) | 91%           |
| <b>Diaphysis</b>            |            |                  |               |
| Femur left                  | 45         | 0.89 (0.83-0.94) | 58%           |
| Femur right                 | 45         | 0.89 (0.84-0.95) | 56%           |
| Fibula left                 | 45         | 0.95 (0.89-1.00) | 91%           |
| Fibula right                | 45         | 0.96 (0.92-1.00) | 89%           |
| Humerus left                | 35         | 0.95 (0.89-1.00) | 86%           |
| Humerus right               | 35         | 0.91 (0.80-1.00) | 74%           |
| Radius left                 | 34         | 0.97 (0.92-1.00) | 91%           |
| Radius right                | 35         | 0.96 (0.90-1.00) | 89%           |
| Tibia left                  | 45         | 0.91 (0.86-0.96) | 64%           |
| Tibia right                 | 45         | 0.94 (0.90-0.97) | 69%           |
| Ulna left                   | 35         | 0.96 (0.90-1.00) | 91%           |
| Ulna right                  | 35         | 0.95 (0.90-1.00) | 91%           |
| <b>Diaphysis Contiguity</b> |            |                  |               |
| Femur left                  | 45         | 0.84 (0.75-0.94) | 76%           |
| Femur right                 | 45         | 0.80 (0.71-0.90) | 67%           |
| Fibula left                 | 44         | 0.96 (0.92-1.00) | 93%           |
| Fibula right                | 44         | 0.94 (0.88-1.00) | 91%           |
| Humerus left                | 35         | 0.95 (0.90-1.00) | 89%           |

|                          |    |                  |     |
|--------------------------|----|------------------|-----|
| Humerus right            | 35 | 0.92 (0.84-0.99) | 83% |
| Radius left              | 34 | 0.97 (0.90-1.00) | 97% |
| Radius right             | 35 | 0.92 (0.83-1.00) | 91% |
| Tibia left               | 45 | 0.86 (0.76-0.95) | 80% |
| Tibia right              | 45 | 0.84 (0.74-0.94) | 78% |
| Ulna left                | 35 | 0.98 (0.95-1.00) | 94% |
| Ulna right               | 35 | 0.98 (0.94-1.00) | 97% |
| <b>Distal Metaphysis</b> |    |                  |     |
| Femur left               | 45 | 0.71 (0.58-0.85) | 51% |
| Femur right              | 45 | 0.65 (0.51-0.78) | 36% |
| Fibula left              | 45 | 0.72 (0.56-0.88) | 67% |
| Fibula right             | 45 | 0.82 (0.71-0.94) | 71% |
| Humerus left             | 35 | 0.96 (0.91-1.00) | 91% |
| Humerus right            | 35 | 0.91 (0.80-1.00) | 86% |
| Radius left              | 35 | 0.86 (0.74-0.98) | 83% |
| Radius right             | 35 | 0.82 (0.67-0.98) | 83% |
| Tibia left               | 45 | 0.83 (0.75-0.92) | 53% |
| Tibia right              | 45 | 0.81 (0.72-0.89) | 53% |
| Ulna left                | 35 | 0.85 (0.72-0.97) | 83% |
| Ulna right               | 35 | 0.82 (0.70-0.95) | 74% |
| <b>Distal Epiphysis</b>  |    |                  |     |
| Femur left               | 45 | 0.92 (0.88-0.96) | 62% |
| Femur right              | 45 | 0.91 (0.87-0.95) | 56% |
| Fibula left              | 45 | 0.90 (0.81-0.99) | 87% |
| Fibula right             | 45 | 0.93 (0.87-0.99) | 80% |
| Humerus left             | 35 | 0.94 (0.87-1.00) | 89% |
| Humerus right            | 35 | 0.94 (0.87-1.00) | 83% |
| Radius left              | 35 | 0.90 (0.77-1.00) | 89% |
| Radius right             | 35 | 0.87 (0.72-1.00) | 91% |
| Tibia left               | 45 | 0.90 (0.84-0.97) | 64% |
| Tibia right              | 45 | 0.85 (0.77-0.92) | 53% |
| Ulna left                | 35 | 0.96 (0.92-1.00) | 91% |
| Ulna right               | 35 | 0.96 (0.92-1.00) | 91% |

95%CI, 95% confidence interval.

\* Kappa could not be calculated due to full agreement.

### C. Presence of surrounding tissue hyperintensity

| Site                 | n subjects | Kappa (95%CI)    | Agreement (%) |
|----------------------|------------|------------------|---------------|
| <b>Spine</b>         |            |                  |               |
| C1                   | 45         | NA*              | 100%          |
| C2                   | 45         | NA*              | 100%          |
| C3                   | 45         | NA*              | 100%          |
| C4                   | 45         | NA*              | 100%          |
| C5                   | 45         | NA*              | 100%          |
| C6                   | 45         | NA*              | 100%          |
| C7                   | 45         | 0.99 (0.98-1.00) | 98%           |
| T1                   | 45         | 0.99 (0.98-1.00) | 98%           |
| T2                   | 45         | NA*              | 100%          |
| T3                   | 45         | 0.98 (0.93-1.00) | 98%           |
| T4                   | 45         | 0.98 (0.93-1.00) | 98%           |
| T5                   | 45         | 0.98 (0.93-1.00) | 98%           |
| T6                   | 45         | 0.98 (0.93-1.00) | 98%           |
| T7                   | 45         | 0.99 (0.98-1.00) | 98%           |
| T8                   | 45         | 0.99 (0.96-1.00) | 98%           |
| T9                   | 45         | NA*              | 100%          |
| T10                  | 45         | NA*              | 100%          |
| T11                  | 45         | NA*              | 100%          |
| T12                  | 45         | NA*              | 100%          |
| L1                   | 45         | NA*              | 100%          |
| L2                   | 45         | NA*              | 100%          |
| L3                   | 45         | NA*              | 100%          |
| L4                   | 45         | NA*              | 100%          |
| L5                   | 45         | NA*              | 100%          |
| <b>Complex bone</b>  |            |                  |               |
| Ilium left           | 45         | NA*              | 100%          |
| Ilium right          | 45         | 0.97 (0.93-1.00) | 96%           |
| Periacetabulum left  | 45         | 0.96 (0.92-1.00) | 93%           |
| Periacetabulum right | 45         | 0.97 (0.93-1.00) | 96%           |
| Pubis/ischium left   | 45         | 0.98 (0.94-1.00) | 96%           |
| Pubis/ischium right  | 45         | 0.98 (0.95-1.00) | 93%           |
| Sacrum left          | 45         | 0.97 (0.92-1.00) | 96%           |
| Sacrum right         | 45         | NA*              | 100%          |
| <b>Flat bone</b>     |            |                  |               |
| Clavicle left        | 45         | 0.94 (0.88-1.00) | 89%           |
| Clavicle right       | 45         | 0.91 (0.85-0.96) | 78%           |
| Mandible left        | 45         | 0.92 (0.87-0.98) | 82%           |
| Mandible right       | 45         | 0.94 (0.89-0.98) | 84%           |
| Manubrium/sterna     | 45         | 0.99 (0.98-1.00) | 98%           |
| Patella left         | 45         | 0.98 (0.94-1.00) | 96%           |
| Patella right        | 45         | 0.93 (0.86-1.00) | 89%           |
| Rib A left           | 45         | 0.98 (0.96-1.00) | 96%           |
| Rib A right          | 45         | 0.97 (0.94-1.00) | 91%           |
| Rib B left           | 45         | 0.98 (0.95-1.00) | 93%           |
| Rib B right          | 45         | 0.97 (0.94-1.00) | 91%           |
| Rib C left           | 45         | 0.99 (0.98-1.00) | 98%           |

|                     |    |                  |      |
|---------------------|----|------------------|------|
| Rib C right         | 45 | 0.99 (0.98-1.00) | 98%  |
| Rib D left          | 45 | 0.99 (0.98-1.00) | 98%  |
| Rib D right         | 45 | 0.98 (0.96-1.00) | 96%  |
| Rib E left          | 45 | NA*              | 100% |
| Rib E right         | 45 | NA*              | 100% |
| Rib F left          | 45 | NA*              | 100% |
| Rib F right         | 45 | 0.99 (0.98-1.00) | 98%  |
| Rib G left          | 45 | NA*              | 100% |
| Rib G right         | 45 | NA*              | 100% |
| Rib H left          | 45 | NA*              | 100% |
| Rib H right         | 45 | NA*              | 100% |
| Rib I left          | 45 | NA*              | 100% |
| Rib I right         | 45 | NA*              | 100% |
| Rib J left          | 45 | NA*              | 100% |
| Rib J right         | 45 | NA*              | 100% |
| Rib K left          | 45 | NA*              | 100% |
| Rib K right         | 45 | NA*              | 100% |
| Rib L left          | 45 | NA*              | 100% |
| Rib L right         | 45 | NA*              | 100% |
| Scapula left        | 45 | 0.97 (0.93-1.00) | 93%  |
| Scapula right       | 45 | 0.97 (0.93-1.00) | 93%  |
| Skull left          | 45 | NA*              | 100% |
| Skull right         | 45 | NA*              | 100% |
| <b>Hand/foot</b>    |    |                  |      |
| Fore/mid foot left  | 35 | 0.92 (0.86-0.98) | 80%  |
| Fore/mid foot right | 35 | 0.93 (0.87-0.99) | 83%  |
| Hindfoot left       | 45 | 0.93 (0.86-1.00) | 91%  |
| Hindfoot right      | 45 | 0.92 (0.85-0.99) | 89%  |
| Hand left           | 35 | 0.98 (0.94-1.00) | 97%  |
| Hand right          | 35 | 0.97 (0.93-1.00) | 94%  |
| <b>Long bone</b>    |    |                  |      |
| Femur left          | 45 | 0.90 (0.83-0.98) | 84%  |
| Femur right         | 45 | 0.85 (0.77-0.94) | 76%  |
| Fibula left         | 45 | 0.93 (0.87-1.00) | 89%  |
| Fibula right        | 45 | 0.94 (0.89-1.00) | 89%  |
| Humerus left        | 35 | 0.98 (0.95-1.00) | 94%  |
| Humerus right       | 35 | 0.95 (0.89-1.00) | 91%  |
| Radius left         | 35 | 0.97 (0.93-1.00) | 91%  |
| Radius right        | 35 | 0.97 (0.93-1.00) | 94%  |
| Tibia left          | 45 | 0.88 (0.79-0.96) | 80%  |
| Tibia right         | 45 | 0.76 (0.65-0.87) | 64%  |
| Ulna left           | 35 | 0.97 (0.93-1.00) | 91%  |
| Ulna right          | 35 | 0.99 (0.97-1.00) | 97%  |

95%CI, 95% confidence interval.

\* Kappa could not be calculated due to full agreement.

#### D. Presence of bony expansion

| Site                 | n subjects | Kappa (95%CI)    | Agreement (%) |
|----------------------|------------|------------------|---------------|
| <b>Spine</b>         |            |                  |               |
| C1                   | 45         | NA*              | 100%          |
| C2                   | 45         | NA*              | 100%          |
| C3                   | 45         | NA*              | 100%          |
| C4                   | 45         | NA*              | 100%          |
| C5                   | 45         | NA*              | 100%          |
| C6                   | 45         | NA*              | 100%          |
| C7                   | 45         | NA*              | 100%          |
| T1                   | 45         | NA*              | 100%          |
| T2                   | 45         | NA*              | 100%          |
| T3                   | 45         | NA*              | 100%          |
| T4                   | 45         | NA*              | 100%          |
| T5                   | 45         | NA*              | 100%          |
| T6                   | 45         | NA*              | 100%          |
| T7                   | 45         | NA*              | 100%          |
| T8                   | 45         | NA*              | 100%          |
| T9                   | 45         | NA*              | 100%          |
| T10                  | 45         | NA*              | 100%          |
| T11                  | 45         | NA*              | 100%          |
| T12                  | 45         | NA*              | 100%          |
| L1                   | 45         | NA*              | 100%          |
| L2                   | 45         | NA*              | 100%          |
| L3                   | 45         | NA*              | 100%          |
| L4                   | 45         | NA*              | 100%          |
| L5                   | 45         | NA*              | 100%          |
| <b>Complex bone</b>  |            |                  |               |
| Ilium left           | 45         | NA*              | 100%          |
| Ilium right          | 45         | 0.97 (0.92-1.00) | 96%           |
| Periacetabulum left  | 45         | 0.98 (0.93-1.00) | 98%           |
| Periacetabulum right | 45         | 0.98 (0.96-1.00) | 96%           |
| Pubis/ischium left   | 45         | 0.99 (0.98-1.00) | 98%           |
| Pubis/ischium right  | 45         | 0.99 (0.98-1.00) | 98%           |
| Sacrum left          | 45         | 0.99 (0.96-1.00) | 98%           |
| Sacrum right         | 45         | NA*              | 100%          |
| <b>Flat bone</b>     |            |                  |               |
| Clavicle left        | 45         | 0.97 (0.92-1.00) | 96%           |
| Clavicle right       | 45         | 0.93 (0.87-1.00) | 89%           |
| Mandible left        | 45         | 0.99 (0.96-1.00) | 98%           |
| Mandible right       | 45         | NA*              | 100%          |
| Manubrium/sterna     | 45         | NA*              | 100%          |
| Patella left         | 45         | NA*              | 100%          |
| Patella right        | 45         | NA*              | 100%          |
| Rib A left           | 45         | NA*              | 100%          |
| Rib A right          | 45         | NA*              | 100%          |
| Rib B left           | 45         | NA*              | 100%          |
| Rib B right          | 45         | NA*              | 100%          |

|                     |    |                  |      |
|---------------------|----|------------------|------|
| Rib C left          | 45 | NA*              | 100% |
| Rib C right         | 45 | NA*              | 100% |
| Rib D left          | 45 | NA*              | 100% |
| Rib D right         | 45 | NA*              | 100% |
| Rib E left          | 45 | NA*              | 100% |
| Rib E right         | 45 | NA*              | 100% |
| Rib F left          | 45 | NA*              | 100% |
| Rib F right         | 45 | NA*              | 100% |
| Rib G left          | 45 | NA*              | 100% |
| Rib G right         | 45 | NA*              | 100% |
| Rib H left          | 45 | NA*              | 100% |
| Rib H right         | 45 | NA*              | 100% |
| Rib I left          | 45 | NA*              | 100% |
| Rib I right         | 45 | NA*              | 100% |
| Rib J left          | 45 | NA*              | 100% |
| Rib J right         | 45 | NA*              | 100% |
| Rib K left          | 45 | NA*              | 100% |
| Rib K right         | 45 | NA*              | 100% |
| Rib L left          | 45 | NA*              | 100% |
| Rib L right         | 45 | NA*              | 100% |
| Scapula left        | 45 | NA*              | 100% |
| Scapula right       | 45 | NA*              | 100% |
| Skull left          | 45 | NA*              | 100% |
| Skull right         | 45 | NA*              | 100% |
| <b>Hand/foot</b>    |    |                  |      |
| Fore/mid foot left  | 35 | NA*              | 100% |
| Fore/mid foot right | 35 | NA*              | 100% |
| Hindfoot left       | 45 | NA*              | 100% |
| Hindfoot right      | 45 | 0.99 (0.98-1.00) | 98%  |
| Hand left           | 35 | NA*              | 100% |
| Hand right          | 35 | NA*              | 100% |
| <b>Long bone</b>    |    |                  |      |
| Femur left          | 45 | 0.98 (0.96-1.00) | 96%  |
| Femur right         | 45 | 0.93 (0.88-0.99) | 87%  |
| Fibula left         | 45 | 0.99 (0.98-1.00) | 98%  |
| Fibula right        | 45 | 0.99 (0.96-1.00) | 98%  |
| Humerus left        | 35 | NA*              | 100% |
| Humerus right       | 35 | 0.99 (0.97-1.00) | 97%  |
| Radius left         | 35 | NA*              | 100% |
| Radius right        | 35 | 0.98 (0.94-1.00) | 97%  |
| Tibia left          | 45 | 0.98 (0.96-1.00) | 96%  |
| Tibia right         | 45 | 0.94 (0.89-0.99) | 87%  |
| Ulna left           | 35 | NA*              | 100% |
| Ulna right          | 35 | NA*              | 100% |

95%CI, 95% confidence interval.

\* Kappa could not be calculated due to full agreement.

### E. Vertebral compression

| Site         | n subjects | Kappa (95%CI)    | Agreement (%) |
|--------------|------------|------------------|---------------|
| <b>Spine</b> |            |                  |               |
| C1           | 45         | NA*              | 100%          |
| C2           | 45         | NA*              | 100%          |
| C3           | 45         | 0.99 (0.98-1.00) | 98%           |
| C4           | 45         | NA*              | 100%          |
| C5           | 45         | NA*              | 100%          |
| C6           | 45         | 0.97 (0.93-1.00) | 93%           |
| C7           | 45         | 0.99 (0.96-1.00) | 98%           |
| T1           | 45         | 0.98 (0.93-1.00) | 98%           |
| T2           | 45         | 0.99 (0.96-1.00) | 98%           |
| T3           | 45         | 0.97 (0.92-1.00) | 96%           |
| T4           | 45         | 0.98 (0.96-1.00) | 96%           |
| T5           | 45         | 0.98 (0.96-1.00) | 93%           |
| T6           | 45         | 0.97 (0.94-1.00) | 96%           |
| T7           | 45         | 0.98 (0.95-1.00) | 96%           |
| T8           | 45         | 0.97 (0.92-1.00) | 96%           |
| T9           | 45         | NA*              | 100%          |
| T10          | 45         | NA*              | 100%          |
| T11          | 45         | NA*              | 100%          |
| T12          | 45         | 0.98 (0.94-1.00) | 96%           |
| L1           | 45         | 0.98 (0.95-1.00) | 93%           |
| L2           | 45         | 0.99 (0.98-1.00) | 98%           |
| L3           | 45         | NA*              | 100%          |
| L4           | 45         | NA*              | 100%          |
| L5           | 45         | NA*              | 100%          |

95%CI, 95% confidence interval.

\* Kappa could not be calculated due to full agreement.

## F. Joint effusion

| Site             | n subjects | Kappa (95%CI)    | Agreement (%) |
|------------------|------------|------------------|---------------|
| Shoulder left    | 45         | NA*              | 100%          |
| Shoulder right   | 45         | NA*              | 100%          |
| Elbow left       | 45         | NA*              | 100%          |
| Elbow right      | 45         | 0.97 (0.92-1.00) | 96%           |
| Wrist left       | 45         | NA*              | 100%          |
| Wrist right      | 45         | NA*              | 100%          |
| Hip left         | 45         | 0.88 (0.82-0.95) | 73%           |
| Hip right        | 45         | 0.88 (0.81-0.95) | 76%           |
| Knee left        | 45         | 0.89 (0.83-0.95) | 73%           |
| Knee right       | 45         | 0.90 (0.84-0.96) | 76%           |
| Tibiotalar left  | 45         | 0.86 (0.78-0.95) | 76%           |
| Tibiotalar right | 45         | 0.82 (0.73-0.91) | 67%           |
| Subtalar left    | 45         | 0.98 (0.95-1.00) | 93%           |
| Subtalar right   | 45         | 0.98 (0.95-1.00) | 93%           |

95%CI, 95% confidence interval.

\* Kappa could not be calculated due to full agreement.

Supplement 7. Descriptive data of readings with various confidence levels.

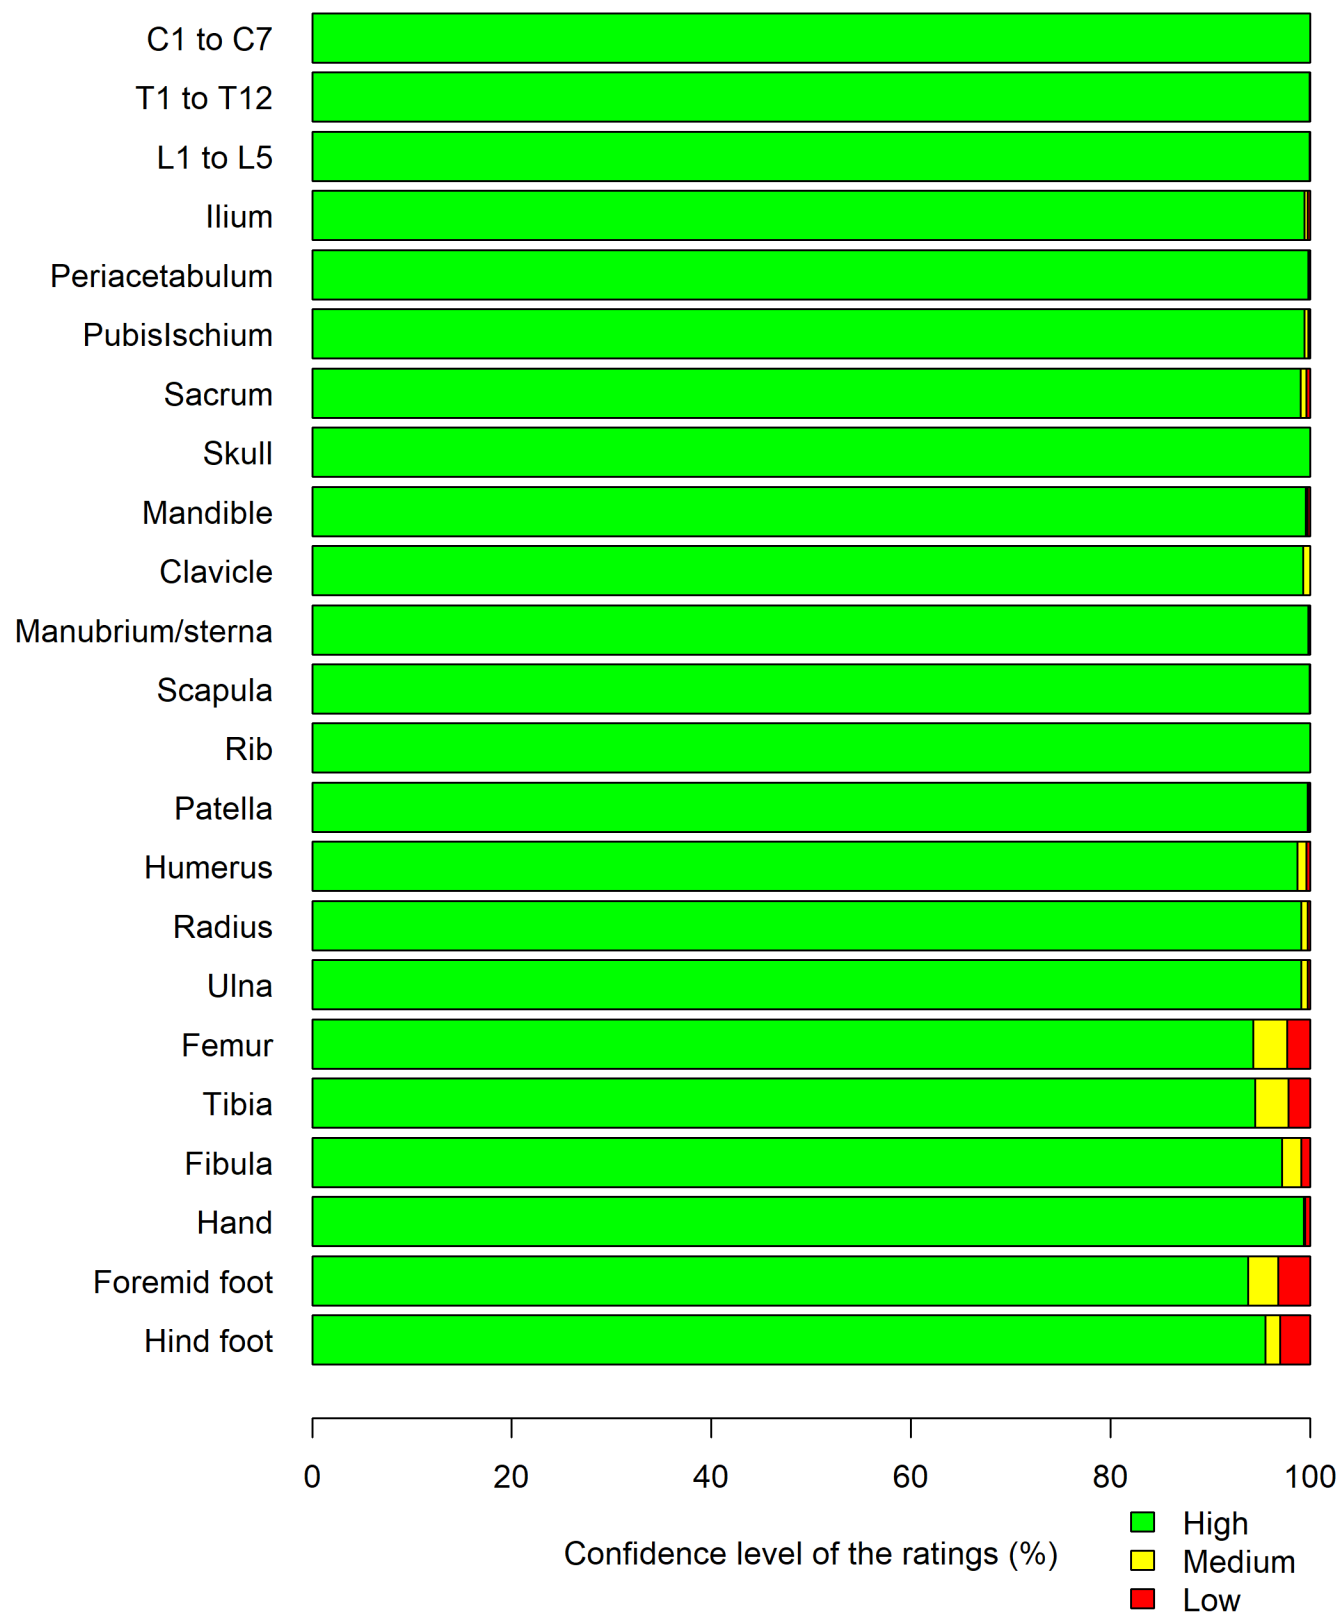

Supplement: 190186DataSuppl.pdf [file 190186DataSuppl.pdf]
